# Supplementary material
Source: publisher site journal article supplement (https://www.spandidos-publications.com/5620/downloadSupplementary)
Supplement: Supplementary file 1 [file downloadSupplementary]

## Sheet: up-regulated（FC＞1.3）
Table SII. Sensitized obese mouse group versus non-sensitized lean mouse group up and downregulated differentially expressed proteins.
Accession	Gene Name	Description	Coverage [%]	# Peptides	# PSMs	# Unique Peptides	# AAs	MW [kDa]	calc. pI	Score Sequest HT: Sequest HT	Case1	Case2	Case3	Con1	Con2	Con3	FC	P value	Log2FC	NCBI_gene_ID
Q9EP95	Retnla	Resistin-like alpha OS=Mus musculus OX=10090 GN=Retnla PE=1 SV=1	23	2	2	2	111	11.9	5.25	2.84	165.3	194.4	154.5	30.7	26.8	28.3	5.99301	0.000283	2.58328	57262
P01636		Ig kappa chain V-V region MOPC 149 OS=Mus musculus OX=10090 PE=1 SV=1	21	2	7	1	108	12	7.28	14.11	168.1	159.4	166.1	37.9	25.2	43.3	4.6391	2.72e-05	2.21384	#N/A
Q9JL95	Prg3	Proteoglycan 3 OS=Mus musculus OX=10090 GN=Prg3 PE=2 SV=1	3	1	1	1	222	25.2	6.52	2.51	158.6	164.3	158.3	39.5	41.8	37.4	4.05392	8.26e-07	2.01932	53856
P04918	Saa3	Serum amyloid A-3 protein OS=Mus musculus OX=10090 GN=Saa3 PE=1 SV=1	6	1	1	1	122	13.8	9.88	1.98	154.5	161.6	161.5	47.5	39.4	35.5	3.90196	9.82e-06	1.9642	20210
Q9R002	Ifi202	Interferon-activable protein 202 OS=Mus musculus OX=10090 GN=Ifi202 PE=1 SV=3	4	2	2	2	445	50.4	8.48	3.95	156.2	158.1	154.1	43.3	46.5	41.9	3.55657	3.84e-07	1.83049	-
A0A140T8N9	Igkv6-32	Immunoglobulin kappa variable 6-32 (Fragment) OS=Mus musculus OX=10090 GN=Igkv6-32 PE=4 SV=2	26	2	9	2	115	12.6	7.85	22.12	163	155.8	147.3	43.4	48.4	42.1	3.48096	2.32e-05	1.79948	-
E9PX73	Ly9	T-lymphocyte surface antigen Ly-9 OS=Mus musculus OX=10090 GN=Ly9 PE=1 SV=1	3	2	2	2	544	61.1	7.11	3.63	160.4	148.1	156.2	43.9	43.5	48	3.43205	9.34e-06	1.77907	17085
Q9JHF7	Hpgds	Hematopoietic prostaglandin D synthase OS=Mus musculus OX=10090 GN=Hpgds PE=1 SV=3	11	2	2	2	199	23.2	6.8	3.12	157.2	147.3	153	49.6	47	45.9	3.21053	4.37e-06	1.68281	54486
A0A140LHP7	Tyrobp	TYRO protein tyrosine kinase-binding protein (Fragment) OS=Mus musculus OX=10090 GN=Tyrobp PE=1 SV=1	6	1	1	1	141	15.2	5.06	2.66	153.4	154.4	149.1	43	57.2	42.9	3.19287	3.14e-05	1.67485	22177
E9PXX7	Txndc5	Thioredoxin domain-containing protein 5 OS=Mus musculus OX=10090 GN=Txndc5 PE=1 SV=1	46	13	26	13	344	38.5	5.39	55.85	158.1	146.3	151.4	46.3	49.2	48.6	3.16308	7.93e-06	1.66133	105245
P18242	Ctsd	Cathepsin D OS=Mus musculus OX=10090 GN=Ctsd PE=1 SV=1	37	12	49	12	410	44.9	7.15	85.75	155.7	146.4	152.2	48	47.7	50	3.11805	3.31e-06	1.64064	13033
A0A0A6YYE7	Igkv4-57	Immunoglobulin kappa variable 4-57 (Fragment) OS=Mus musculus OX=10090 GN=Igkv4-57 PE=4 SV=2	12	1	3	1	117	12.7	8.91	5.79	149	157.3	147.8	42.5	54.1	49.2	3.11454	2.17e-05	1.63902	-
P11928	Oas1a	2'-5'-oligoadenylate synthase 1A OS=Mus musculus OX=10090 GN=Oas1a PE=1 SV=2	8	3	4	3	367	42.4	8.09	5.98	153.3	147.1	151.8	46.7	46.3	54.8	3.05954	6.99e-06	1.61331	246730
Q99N69	Lpxn	Leupaxin OS=Mus musculus OX=10090 GN=Lpxn PE=1 SV=2	10	4	4	4	386	43.5	6.43	10.65	151.7	149	148.6	50.3	51.3	49.1	2.98142	1.12e-07	1.576	107321
Q61878	Prg2	Bone marrow proteoglycan OS=Mus musculus OX=10090 GN=Prg2 PE=1 SV=1	9	2	3	2	223	24.2	6.2	6.9	156.3	148.5	144.2	48.4	51.3	51.2	2.97548	1.1e-05	1.57312	19074
P01878		Ig alpha chain C region OS=Mus musculus OX=10090 PE=1 SV=1	44	12	99	12	344	36.9	5.06	284.73	150.9	148.6	149	49.5	50.7	51.3	2.9604	3.83e-08	1.56579	#N/A
A0A0A6YXN4	Ighv1-18	Immunoglobulin heavy variable V1-18 (Fragment) OS=Mus musculus OX=10090 GN=Ighv1-18 PE=1 SV=1	39	4	7	2	117	12.9	7.94	14.79	147.5	148.4	150.4	47.9	55.8	49.9	2.9056	2.66e-06	1.53884	-
O09046	Il4i1	L-amino-acid oxidase OS=Mus musculus OX=10090 GN=Il4i1 PE=1 SV=1	4	2	2	2	630	70.1	6.83	5.35	154.4	146	145.3	47.2	53.7	53.4	2.88853	1.13e-05	1.53033	100328588
Q920A5	Scpep1	Retinoid-inducible serine carboxypeptidase OS=Mus musculus OX=10090 GN=Scpep1 PE=1 SV=2	12	6	10	6	452	50.9	5.66	21.88	149.4	148.3	147.9	49.7	53.6	51	2.88788	1.55e-07	1.53001	74617
A0A140T8Q1	Igkv12-41	Protein Igkv12-41 (Fragment) OS=Mus musculus OX=10090 GN=Igkv12-41 PE=1 SV=2	41	4	9	2	115	12.6	8.31	25.73	150.3	145.6	149	53	51.9	50.4	2.86478	4.42e-07	1.51842	-
Q9D8I1	Mzb1	Marginal zone B- and B1-cell-specific protein OS=Mus musculus OX=10090 GN=Mzb1 PE=1 SV=2	32	5	10	5	188	20.6	6.02	16.6	149.1	146.4	148.3	50.5	54.4	51.4	2.83941	2.93e-07	1.50559	69816
A2APF7	Zbp1	Z-DNA-binding protein 1 OS=Mus musculus OX=10090 GN=Zbp1 PE=1 SV=1	3	1	2	1	411	44.2	5.8	6.88	146.8	149.4	146.6	51.7	60	45.4	2.81859	2.51e-05	1.49497	58203
P39654	Alox15	Arachidonate 15-lipoxygenase OS=Mus musculus OX=10090 GN=Alox15 PE=1 SV=4	12	7	10	7	663	75.4	6.11	16.35	149.4	145.6	145.7	51.5	53.2	54.6	2.76648	4.33e-07	1.46805	11687
Q9JHG7	Pik3cg	Phosphatidylinositol 4,5-bisphosphate 3-kinase catalytic subunit gamma isoform OS=Mus musculus OX=10090 GN=Pik3cg PE=1 SV=2	4	4	4	4	1102	126.3	7.21	6.64	150.9	135.6	153.6	44.6	61.7	53.5	2.75407	0.000235	1.46156	30955
Q61176	Arg1	Arginase-1 OS=Mus musculus OX=10090 GN=Arg1 PE=1 SV=1	30	8	16	8	323	34.8	7.01	26.27	149.2	143	148	53.6	52.8	53.5	2.75297	1.06e-06	1.46099	11846
Q9QZ85	Iigp1	Interferon-inducible GTPase 1 OS=Mus musculus OX=10090 GN=Iigp1 PE=1 SV=2	14	5	5	5	413	47.5	6.33	12.66	146.5	151.3	140.8	55.8	57.6	48	2.71747	2.6e-05	1.44227	60440
P31725	S100a9	Protein S100-A9 OS=Mus musculus OX=10090 GN=S100a9 PE=1 SV=3	54	9	79	9	113	13	7.17	129.25	147.2	146.4	143.8	50.6	58.2	53.8	2.69004	2.96e-06	1.42763	20202
P25206	Mcm3	DNA replication licensing factor MCM3 OS=Mus musculus OX=10090 GN=Mcm3 PE=1 SV=2	14	9	13	9	812	91.5	5.55	17.6	142.6	147.1	147.6	57.8	49.5	55.4	2.68777	6.29e-06	1.42641	17215
Q3U687	Ifit1bl2	Interferon-induced protein with tetratricopeptide repeats 1B-like 2 OS=Mus musculus OX=10090 GN=Ifit1bl2 PE=1 SV=1	9	4	4	2	466	54	6.87	8.24	150.6	144.4	141	52.7	56.2	55	2.66016	7.05e-06	1.41151	112419
O70200	Aif1	Allograft inflammatory factor 1 OS=Mus musculus OX=10090 GN=Aif1 PE=1 SV=1	18	3	4	3	147	16.9	8.76	7.72	151.2	142.3	141.8	53.4	57.1	54.2	2.64299	1.01e-05	1.40217	11629
Q9R1Q9	Atp6ap1	V-type proton ATPase subunit S1 OS=Mus musculus OX=10090 GN=Atp6ap1 PE=1 SV=1	3	2	2	2	463	51	5.92	2.26	146	141.6	147.7	57.7	50.2	56.8	2.64299	7.12e-06	1.40217	54411
A0A075B5W2	Ighv1-52	Immunoglobulin heavy variable 1-52 OS=Mus musculus OX=10090 GN=Ighv1-52 PE=4 SV=1	28	3	5	2	116	13	7.88	8.2	150.6	137.7	146.5	55.9	54	55.4	2.63037	1.99e-05	1.39527	-
Q64287	Irf4	Interferon regulatory factor 4 OS=Mus musculus OX=10090 GN=Irf4 PE=1 SV=1	8	4	4	3	450	51.5	6.99	5.17	150.2	142.2	142.3	55.4	52.4	57.6	2.62817	7.92e-06	1.39406	16364
P28667	Marcksl1	MARCKS-related protein OS=Mus musculus OX=10090 GN=Marcksl1 PE=1 SV=2	14	2	4	2	200	20.2	4.61	6.74	132.8	158.3	143.3	52.3	53.4	59.9	2.62319	0.000323	1.39132	17357
Q9BDB7	Ifi44l	Interferon-induced protein 44-like OS=Mus musculus OX=10090 GN=Ifi44l PE=2 SV=2	7	3	5	3	447	49.6	6.54	7.67	152.7	142.4	138.4	51.4	56.2	58.8	2.60517	4.89e-05	1.38138	15061
Q8BV66	Ifi44	Interferon-induced protein 44 OS=Mus musculus OX=10090 GN=Ifi44 PE=2 SV=1	5	2	2	2	422	47.8	7.03	2.21	136.8	148.4	146.6	67	58.5	42.7	2.56718	0.000387	1.36019	99899
Q9D7Z6	Clca1	Calcium-activated chloride channel regulator 1 OS=Mus musculus OX=10090 GN=Clca1 PE=1 SV=2	15	12	17	12	913	100	6.01	27.21	144.3	143.2	144.2	56	58.4	53.9	2.56506	3.31e-07	1.35899	23844
O89017	Lgmn	Legumain OS=Mus musculus OX=10090 GN=Lgmn PE=1 SV=1	9	3	3	3	435	49.3	6.39	5.1	136.1	151.1	142.7	49.6	64.2	56.4	2.52585	0.000139	1.33677	19141
A0A0R4J0Z1	Pdia4	Protein disulfide-isomerase A4 OS=Mus musculus OX=10090 GN=Pdia4 PE=1 SV=1	50	34	99	34	641	72.3	5.22	204.68	146	140.4	142.5	55.6	57.2	58.4	2.50526	1.22e-06	1.32496	12304
A0A0A6YX66	Ighv1-20	Immunoglobulin heavy variable V1-20 (Fragment) OS=Mus musculus OX=10090 GN=Ighv1-20 PE=4 SV=1	24	3	4	1	117	13.1	8.43	8.54	146	141.8	140.8	59	51.6	60.9	2.49912	1.23e-05	1.32142	-
A0A0B4J1K5	Iglv3	Immunoglobulin lambda variable 3 (Fragment) OS=Mus musculus OX=10090 GN=Iglv3 PE=4 SV=1	8	1	1	1	122	13.4	5.76	2.61	131.8	166.1	130.2	63	60.7	48.1	2.49185	0.002464	1.31722	-
Q9R233	Tapbp	Tapasin OS=Mus musculus OX=10090 GN=Tapbp PE=1 SV=2	14	6	10	6	465	49.7	8.5	18.56	140.1	148.2	139.6	54.7	56.4	61.1	2.4849	1.47e-05	1.31319	21356
A0A0R4J027	Acod1	Cis-aconitate decarboxylase OS=Mus musculus OX=10090 GN=Acod1 PE=1 SV=1	7	4	5	4	488	53.7	7.55	7.1	138.3	143.1	144.9	55.7	68.4	49.6	2.45423	0.000138	1.29527	16365
P18528		Ig heavy chain V region 6.96 OS=Mus musculus OX=10090 PE=4 SV=1	31	2	5	1	98	11	7.93	15.5	144.2	140.3	140.8	55.1	58.1	61.5	2.43446	2.97e-06	1.2836	#N/A
A0A0G2JFZ3	Igkv19-93	Immunoglobulin kappa chain variable 19-93 (Fragment) OS=Mus musculus OX=10090 GN=Igkv19-93 PE=1 SV=4	17	2	4	2	115	12.8	8.29	10.44	146.4	137.1	141.5	59.5	58.9	56.6	2.42857	7.89e-06	1.28011	-
A0A075B5Q3	Ighv2-5	Immunoglobulin heavy variable 2-5 OS=Mus musculus OX=10090 GN=Ighv2-5 PE=4 SV=1	17	2	2	1	115	12.5	8.97	5.59	146.7	139.9	136.8	54.7	66.2	55.6	2.39887	6.3e-05	1.26235	-
Q3T9E4	Tgtp2	T-cell-specific guanine nucleotide triphosphate-binding protein 2 OS=Mus musculus OX=10090 GN=Tgtp2 PE=1 SV=2	23	9	11	9	415	47.1	5.74	25.93	144.5	138.8	139.8	60.1	57.9	58.9	2.39175	1.61e-06	1.25806	100039796
Q9WUU7	Ctsz	Cathepsin Z OS=Mus musculus OX=10090 GN=Ctsz PE=1 SV=1	24	6	13	6	306	34	6.6	24.51	141.1	138.3	142.5	58.6	59.7	59.6	2.37156	3.72e-07	1.24583	64138
A0A0B4J1I1	Igkv16-104	Immunoglobulin kappa variable 16-104 (Fragment) OS=Mus musculus OX=10090 GN=Igkv16-104 PE=4 SV=1	9	1	4	1	116	12.9	7.08	8.15	145.6	135.5	139.3	60.2	62	57.4	2.34076	1.57e-05	1.22698	-
P08113	Hsp90b1	Endoplasmin OS=Mus musculus OX=10090 GN=Hsp90b1 PE=1 SV=2	45	38	111	36	802	92.4	4.82	220.98	143	137.9	139.5	58.6	61.9	59.1	2.34076	1.59e-06	1.22698	22027
E9Q5I3	Muc5b	Mucin 5, subtype B, tracheobronchial OS=Mus musculus OX=10090 GN=Muc5b PE=1 SV=1	2	6	8	6	4800	515.1	5.73	7.16	138.3	144.9	136.7	58.7	56.2	65.2	2.33148	2.64e-05	1.22125	74180
Q91XV3	Basp1	Brain acid soluble protein 1 OS=Mus musculus OX=10090 GN=Basp1 PE=1 SV=3	69	10	22	10	226	22.1	4.51	38.63	141.3	142	136.3	57.2	64	59.2	2.32594	7.83e-06	1.21782	70350
Q64339	Isg15	Ubiquitin-like protein ISG15 OS=Mus musculus OX=10090 GN=Isg15 PE=1 SV=4	22	2	4	2	161	17.9	7.9	10.29	150.1	131.5	137.7	61.4	61.9	57.5	2.31914	0.000147	1.21359	100038882
P31996	Cd68	Macrosialin OS=Mus musculus OX=10090 GN=Cd68 PE=1 SV=1	6	2	3	2	326	34.8	8.85	7.71	141.8	135.2	142.1	63.3	52	65.6	2.31675	7.62e-05	1.2121	12514
Q9D8U6	Mcemp1	Mast cell-expressed membrane protein 1 OS=Mus musculus OX=10090 GN=Mcemp1 PE=2 SV=1	13	3	4	3	183	20.6	9.26	6.85	139.9	144.9	133.4	59.7	61	61.1	2.30033	1.96e-05	1.20184	69189
Q61599	Arhgdib	Rho GDP-dissociation inhibitor 2 OS=Mus musculus OX=10090 GN=Arhgdib PE=1 SV=3	44	8	20	8	200	22.8	5.11	18.49	140.7	136.9	140.6	57.8	67	57.1	2.29907	2.12e-05	1.20105	11857
Q09014	Ncf1	Neutrophil cytosol factor 1 OS=Mus musculus OX=10090 GN=Ncf1 PE=1 SV=3	33	13	19	13	390	44.6	9.01	38.72	141.6	137.2	138.7	60.1	60.3	62.1	2.28767	6.83e-07	1.19388	17969
O88593	Pglyrp1	Peptidoglycan recognition protein 1 OS=Mus musculus OX=10090 GN=Pglyrp1 PE=1 SV=1	13	1	1	1	182	20.5	7.44	5	115.7	180.8	121	45.7	105	31.8	2.28767	0.062924	1.19388	21946
A0A0U1RQ20	Pycard	Apoptosis-associated speck-like protein-containing a CARD (Fragment) OS=Mus musculus OX=10090 GN=Pycard PE=1 SV=1	29	4	6	4	151	16.7	4.89	12.24	133.7	143.4	139.3	57.2	65.3	61.1	2.26797	2.92e-05	1.1814	66824
O35744	Chil3	Chitinase-like protein 3 OS=Mus musculus OX=10090 GN=Chil3 PE=1 SV=2	32	12	29	8	398	44.4	5.69	47.35	138.1	143.1	134.9	57.9	64	62.1	2.26141	1.33e-05	1.17722	12655
P10605	Ctsb	Cathepsin B OS=Mus musculus OX=10090 GN=Ctsb PE=1 SV=2	30	10	26	10	339	37.3	5.91	57.18	135.8	142.4	137.8	58.9	63.5	61.7	2.25964	5.25e-06	1.17609	13030
A0A0B4J1M0	Ighv1-77	Immunoglobulin heavy variable 1-77 OS=Mus musculus OX=10090 GN=Ighv1-77 PE=1 SV=1	21	2	3	1	98	10.7	9.22	2.75	142.9	134.7	138.3	59	53.1	72	2.2591	0.000219	1.17575	-
P18527		Ig heavy chain V region 914 OS=Mus musculus OX=10090 PE=1 SV=1	28	2	8	1	97	10.7	9.17	18.33	142.1	137.9	135.7	59.2	62.3	62.8	2.25556	3.87e-06	1.17349	#N/A
P35174	Stfa2	Stefin-2 OS=Mus musculus OX=10090 GN=Stfa2 PE=3 SV=2	19	2	5	2	103	11.8	7.17	10.31	146.5	132.7	136.5	67.9	54.4	62	2.25556	0.00017	1.17349	20862
P01723		Ig lambda-1 chain V region OS=Mus musculus OX=10090 PE=1 SV=2	36	2	3	2	117	12.2	5.21	9.82	146.8	133.3	134.5	66	62.9	56.5	2.23625	0.000119	1.16108	#N/A
E9PWE9	Syk	Tyrosine-protein kinase OS=Mus musculus OX=10090 GN=Syk PE=1 SV=1	22	10	13	10	583	66	7.15	23.46	139.9	137.7	136.8	64.3	58.9	62.5	2.23156	2.01e-06	1.15805	20963
A0A075B5S9	Ighv9-4	Immunoglobulin heavy variable 9-4 OS=Mus musculus OX=10090 GN=Ighv9-4 PE=4 SV=1	35	3	4	3	98	10.9	9.07	10.08	144.3	133.4	136.5	60.2	63.7	62	2.22808	2.35e-05	1.1558	-
Q91Z98	Chil4	Chitinase-like protein 4 OS=Mus musculus OX=10090 GN=Chil4 PE=1 SV=2	32	9	19	5	402	44.9	6.19	29.59	141.5	131.3	141.2	62.3	55	68.8	2.22461	0.000128	1.15355	104183
Q9JM51	Ptges	Prostaglandin E synthase OS=Mus musculus OX=10090 GN=Ptges PE=1 SV=1	11	2	2	2	153	17.3	9.39	5.21	132.9	145	135.8	57.3	64.2	64.8	2.22061	6.48e-05	1.15096	64292
A0A0G2JFP4	Frrs1	Ferric-chelate reductase 1 OS=Mus musculus OX=10090 GN=Frrs1 PE=1 SV=1	1	1	1	1	592	66	8.32	1.83	127.3	146.6	139.4	57.7	66.7	62.4	2.21253	0.000261	1.1457	20321
Q9QZZ4	Myo15a	Unconventional myosin-XV OS=Mus musculus OX=10090 GN=Myo15a PE=1 SV=2	0	1	1	1	3511	395.4	9.16	2.37	137.6	136.2	139.1	60.8	64.5	61.9	2.20566	6.78e-07	1.14121	-
P27808	Mgat1	Alpha-1,3-mannosyl-glycoprotein 2-beta-N-acetylglucosaminyltransferase OS=Mus musculus OX=10090 GN=Mgat1 PE=1 SV=1	5	2	3	2	447	51.7	8.9	4.81	135.8	142	134.5	59.2	66.8	61.8	2.19542	2.02e-05	1.1345	17308
Q9DCJ9	Npl	N-acetylneuraminate lyase OS=Mus musculus OX=10090 GN=Npl PE=1 SV=1	4	2	2	2	320	35.1	8.03	2.29	140.1	141.8	130	52.2	77.7	58.3	2.18863	0.000941	1.13003	74091
F6WR04	Ctss	Cathepsin S OS=Mus musculus OX=10090 GN=Ctss PE=1 SV=1	24	6	10	6	341	38.6	7.15	11.96	139.8	134.4	137.6	62.2	62.2	63.8	2.1881	1.46e-06	1.12968	13040
E0CXZ9	Kcnab2	Voltage-gated potassium channel subunit beta-2 OS=Mus musculus OX=10090 GN=Kcnab2 PE=1 SV=1	16	7	7	7	382	42.7	8.98	9.21	139.2	133.5	138.5	63.2	61.9	63.6	2.17912	2.4e-06	1.12375	16498
Q3UP87	Elane	Neutrophil elastase OS=Mus musculus OX=10090 GN=Elane PE=2 SV=1	15	4	4	4	265	28.6	10.01	4.32	135.4	137.9	137.7	61.3	59.2	68.6	2.17345	1.52e-05	1.11999	50701
Q8CC47	Galns	N-acetylgalactosamine-6-sulfatase OS=Mus musculus OX=10090 GN=Galns PE=1 SV=1	8	4	4	3	440	48.5	6.52	7.9	138.6	135.7	136.2	60.1	62.3	67.1	2.16623	5.21e-06	1.11518	50917
O70145	Ncf2	Neutrophil cytosol factor 2 OS=Mus musculus OX=10090 GN=Ncf2 PE=1 SV=1	31	16	24	16	525	59.4	6.61	43.22	139.3	135.9	134.9	59.4	66.8	63.6	2.1607	8.29e-06	1.1115	17970
O08900	Ikzf3	Zinc finger protein Aiolos OS=Mus musculus OX=10090 GN=Ikzf3 PE=1 SV=2	3	1	1	1	507	57.9	6.33	2.27	129.7	142.4	138	61.7	60.2	68	2.15956	7.73e-05	1.11074	22780
P51437	Camp	Cathelicidin antimicrobial peptide OS=Mus musculus OX=10090 GN=Camp PE=1 SV=2	46	5	12	5	172	19.4	8.68	23.48	136.9	135.6	137.4	62.4	64.3	63.2	2.1585	7.24e-08	1.11003	12796
Q61263	Soat1	Sterol O-acyltransferase 1 OS=Mus musculus OX=10090 GN=Soat1 PE=1 SV=2	2	1	1	1	540	63.8	9.01	2.98	151.7	118.4	138.8	71	50.2	70	2.1386	0.003575	1.09667	20652
Q03267	Ikzf1	DNA-binding protein Ikaros OS=Mus musculus OX=10090 GN=Ikzf1 PE=1 SV=2	4	2	2	2	517	57.3	6.52	6.52	139.1	132.1	137.6	63.1	63.4	64.7	2.13808	4.9e-06	1.09631	22778
D3Z6T3	Ctse	Cathepsin E OS=Mus musculus OX=10090 GN=Ctse PE=1 SV=1	10	4	6	4	364	39.2	4.78	9.83	133.8	134.3	139.8	63.7	62.2	66.2	2.12337	5.69e-06	1.08636	13034
A0A140T8T7	Col6a5	Collagen alpha-5(VI) chain OS=Mus musculus OX=10090 GN=Col6a5 PE=1 SV=1	5	14	15	14	2640	289.3	6.67	22.25	133	133	141.6	61.5	65.6	65.3	2.1185	2.22e-05	1.08305	665033
Q99K94	Stat1	Signal transducer and activator of transcription OS=Mus musculus OX=10090 GN=Stat1 PE=1 SV=1	38	26	48	26	712	83.1	6.02	98.85	137	134.1	136.4	63	64.6	64.9	2.11688	2.89e-07	1.08194	20846
F6SPK0	Ube2j1	Ubiquitin-conjugating enzyme E2 J1 (Fragment) OS=Mus musculus OX=10090 GN=Ube2j1 PE=1 SV=1	22	5	8	5	262	28.9	7.25	14.85	136.9	134	135.1	58.9	72.3	62.8	2.09278	6.45e-05	1.06542	56228
Q9QUH0	Glrx	Glutaredoxin-1 OS=Mus musculus OX=10090 GN=Glrx PE=1 SV=3	37	4	9	4	107	11.9	8.37	16.92	140.5	129.9	135.4	69.2	63.1	61.8	2.09068	5.04e-05	1.06397	93692
P14439	H2-Ea	H-2 class II histocompatibility antigen, E-U alpha chain OS=Mus musculus OX=10090 GN=H2-Ea PE=2 SV=2	5	2	2	2	255	29.1	5.29	2.65	140.9	131.6	133.3	66.5	61.4	66.3	2.0896	2.87e-05	1.06323	-
P11247	Mpo	Myeloperoxidase OS=Mus musculus OX=10090 GN=Mpo PE=1 SV=2	30	23	47	20	718	81.1	9.55	83.7	135.5	134	136.2	65.4	62.4	66.5	2.08801	8.97e-07	1.06213	17523
A0A0A0MQM2	Plch1	Phosphoinositide phospholipase C OS=Mus musculus OX=10090 GN=Plch1 PE=1 SV=1	1	1	5	1	1073	122.5	7.72	6.34	135.6	136.6	133.2	62.6	62.8	69.1	2.08432	7.57e-06	1.05958	269437
Q08024	Cbfb	Core-binding factor subunit beta OS=Mus musculus OX=10090 GN=Cbfb PE=1 SV=1	24	3	3	3	187	22	5.77	5.24	138.2	139.5	127.8	66.4	62.7	65.5	2.08376	5.38e-05	1.05919	12400
P06800	Ptprc	Receptor-type tyrosine-protein phosphatase C OS=Mus musculus OX=10090 GN=Ptprc PE=1 SV=4	14	18	28	18	1293	144.7	5.94	42.44	136.4	133.8	134.5	64.6	65.8	64.9	2.0722	1.36e-07	1.05116	19264
Q91XB0	Trex1	Three-prime repair exonuclease 1 OS=Mus musculus OX=10090 GN=Trex1 PE=1 SV=2	7	2	4	2	314	33.7	7.99	8.07	131.6	138.7	134	55.6	77.7	62.5	2.06486	0.000532	1.04605	22040
Q31621	H2-DMa	Class II histocompatibility antigen, M alpha chain OS=Mus musculus OX=10090 GN=H2-DMa PE=1 SV=1	7	2	2	2	261	29	4.7	4.47	134.6	136.3	133	60	71.4	64.7	2.05966	3.6e-05	1.04241	14998
A0A140T8M3	Igkv8-30	Immunoglobulin kappa chain variable 8-30 (Fragment) OS=Mus musculus OX=10090 GN=Igkv8-30 PE=4 SV=2	37	3	6	2	121	13.3	6.49	11.25	137.9	135.6	130.3	65.4	68.2	62.6	2.0581	1.53e-05	1.04132	-
P20060	Hexb	Beta-hexosaminidase subunit beta OS=Mus musculus OX=10090 GN=Hexb PE=1 SV=2	12	7	8	7	536	61.1	8.12	16.81	138.6	128.9	136	66	63.9	66.6	2.05343	2.15e-05	1.03804	15212
E0CXP3	Cd3g	T-cell surface glycoprotein CD3 gamma chain (Fragment) OS=Mus musculus OX=10090 GN=Cd3g PE=1 SV=1	23	2	2	2	100	11	8.75	2.35	136.3	139.4	127.6	68.5	68.5	59.8	2.04929	0.000113	1.03512	12502
P35492	Hal	Histidine ammonia-lyase OS=Mus musculus OX=10090 GN=Hal PE=1 SV=1	7	5	5	5	657	72.2	6.34	10.13	132.9	135.9	134.5	67.4	63.2	66.2	2.04929	1.42e-06	1.03512	15109
P01592	Jchain	Immunoglobulin J chain OS=Mus musculus OX=10090 GN=Jchain PE=1 SV=4	35	5	11	5	159	18	4.89	27.29	137.6	129	136.2	67	64.6	65.5	2.04363	1.55e-05	1.03114	16069
Q6NVF4	Helb	DNA helicase B OS=Mus musculus OX=10090 GN=Helb PE=1 SV=2	2	2	2	2	1074	121.4	5.82	2.24	139.4	136.5	126.7	59.9	62.3	75.3	2.03848	0.000369	1.02749	117599
P27005	S100a8	Protein S100-A8 OS=Mus musculus OX=10090 GN=S100a8 PE=1 SV=3	90	5	31	5	89	10.3	5.68	57.54	136.1	132.8	133.5	57.2	66.8	73.7	2.03541	0.000153	1.02532	20201
P43276	Hist1h1b	Histone H1.5 OS=Mus musculus OX=10090 GN=Hist1h1b PE=1 SV=2	37	13	43	8	223	22.6	10.92	87.79	139.4	131.8	131.1	63	69.9	64.8	2.0349	3.51e-05	1.02496	-
Q3TRM8	Hk3	Hexokinase-3 OS=Mus musculus OX=10090 GN=Hk3 PE=1 SV=2	20	16	25	16	922	100	5.94	42.18	134.8	132.4	134.1	67.1	64.5	67	2.02065	4.36e-07	1.01482	212032
Q91YN5	Uap1	UDP-N-acetylhexosamine pyrophosphorylase OS=Mus musculus OX=10090 GN=Uap1 PE=1 SV=1	11	5	7	5	522	58.6	6.49	10.95	134.2	135.4	131.6	62.1	69.4	67.2	2.01912	1.01e-05	1.01373	107652
E9Q2X6	Smc4	Structural maintenance of chromosomes protein OS=Mus musculus OX=10090 GN=Smc4 PE=1 SV=1	2	3	3	3	1261	144.1	7.58	3.4	145.4	118.1	137.6	65	61	73	2.01558	0.0016	1.01119	70099
P14901	Hmox1	Heme oxygenase 1 OS=Mus musculus OX=10090 GN=Hmox1 PE=1 SV=1	9	2	2	2	289	32.9	6.54	1.77	126.9	131.3	142.5	83.9	54.2	61.1	2.01155	0.002659	1.0083	15368
A0A075B5T3	Ighv6-6	Immunoglobulin heavy variable 6-6 (Fragment) OS=Mus musculus OX=10090 GN=Ighv6-6 PE=4 SV=1	23	2	4	1	119	13.3	7.08	9.66	129.3	128.9	142.2	50	72.5	77	2.00702	0.002073	1.00505	-
P01807		Ig heavy chain V region X44 OS=Mus musculus OX=10090 PE=1 SV=1	40	4	9	4	119	13.2	7.94	20.26	135.1	130	134.9	67.2	61.4	71.4	2	3.74e-05	1	#N/A
A0A140T8N4	Igkv5-37	Immunoglobulin kappa variable 5-37 (Fragment) OS=Mus musculus OX=10090 GN=Igkv5-37 PE=4 SV=2	10	1	2	1	115	12.6	8	2.67	129.4	131.9	138.1	67.5	60.8	72.4	1.99003	9.82e-05	0.992794	-
Q8BMK4	Ckap4	Cytoskeleton-associated protein 4 OS=Mus musculus OX=10090 GN=Ckap4 PE=1 SV=2	49	28	49	28	575	63.7	5.64	93.69	135	132.8	131.3	64.1	67.9	68.8	1.98755	3.26e-06	0.990991	216197
P08905	Lyz2	Lysozyme C-2 OS=Mus musculus OX=10090 GN=Lyz2 PE=1 SV=2	20	3	9	1	148	16.7	8.81	16.67	130.4	138.8	129	65	71.5	65.3	1.97324	6.13e-05	0.980567	17105
Q05816	Fabp5	Fatty acid-binding protein 5 OS=Mus musculus OX=10090 GN=Fabp5 PE=1 SV=3	73	9	40	9	135	15.1	6.54	85.56	133.6	133.1	131.2	64.7	69.8	67.7	1.96785	2.45e-06	0.976623	16592
P49290	Epx	Eosinophil peroxidase OS=Mus musculus OX=10090 GN=Epx PE=1 SV=2	21	15	24	12	716	81.3	10.35	42.09	132.8	127.8	136.9	68.2	69	65.4	1.96199	2.19e-05	0.972321	13861
O70570	Pigr	Polymeric immunoglobulin receptor OS=Mus musculus OX=10090 GN=Pigr PE=1 SV=1	15	8	10	8	771	84.9	5.4	22.53	136	130.8	130.7	65.4	67.8	69.4	1.96199	6.52e-06	0.972321	18703
Q9DCE9	Igtp	Interferon gamma-induced GTPase OS=Mus musculus OX=10090 GN=Igtp PE=1 SV=1	17	9	10	8	423	48.5	7.77	14.39	132.7	136.4	128.1	65.1	71.8	65.9	1.95858	3.5e-05	0.969808	16145
P01667		Ig kappa chain V-III region PC 6308 OS=Mus musculus OX=10090 PE=1 SV=1	53	3	8	2	111	12.1	4.61	4.88	114.6	130.6	151.7	66.8	65.6	70.8	1.95325	0.004012	0.965875	#N/A
Q01320	Top2a	DNA topoisomerase 2-alpha OS=Mus musculus OX=10090 GN=Top2a PE=1 SV=2	5	8	9	5	1528	172.7	8.6	12.94	123.6	139.2	134	67.4	66.5	69.3	1.95276	0.000158	0.965512	21973
A0A075B5N7	Igkv6-13	Immunoglobulin kappa variable 6-13 OS=Mus musculus OX=10090 GN=Igkv6-13 PE=1 SV=7	41	3	11	2	95	10.4	6.51	19.23	133.7	134.3	128	64.1	71.4	68.5	1.94118	2.57e-05	0.956931	-
Q62426	Cstb	Cystatin-B OS=Mus musculus OX=10090 GN=Cstb PE=1 SV=1	73	5	11	5	98	11	7.39	18.33	135.1	129.5	131.4	65.7	69.1	69.2	1.94118	5.76e-06	0.956931	13014
P08071	Ltf	Lactotransferrin OS=Mus musculus OX=10090 GN=Ltf PE=1 SV=4	53	35	90	35	707	77.8	8.53	189.08	132.8	131.7	131.2	67.6	68.2	68.3	1.93876	2.65e-08	0.955131	17002
Q5I2A0	Serpina3g	Serine protease inhibitor A3G OS=Mus musculus OX=10090 GN=Serpina3g PE=1 SV=2	32	12	20	6	440	49	6.46	51.12	132.5	131.6	131.6	64.6	71	68.7	1.93686	4.65e-06	0.953718	20715
Q3TBA3	Tap1	Antigen peptide transporter 1 OS=Mus musculus OX=10090 GN=Tap1 PE=1 SV=1	14	9	13	9	696	75.9	8.7	20.01	130.5	133.8	131.1	66	70.2	68.4	1.93255	2.3e-06	0.950506	21354
Q8K482	Emilin2	EMILIN-2 OS=Mus musculus OX=10090 GN=Emilin2 PE=1 SV=1	3	3	3	3	1074	117.2	5.62	4.96	125.4	136	133.6	64.2	72.5	68.3	1.92683	9.34e-05	0.946229	246707
Q8CHQ0	Fbxo4	F-box only protein 4 OS=Mus musculus OX=10090 GN=Fbxo4 PE=1 SV=2	8	3	3	3	385	43.7	6.11	2.34	128.4	133.1	133.2	63.9	72.6	68.8	1.92255	2.91e-05	0.943023	106052
P16110	Lgals3	Galectin-3 OS=Mus musculus OX=10090 GN=Lgals3 PE=1 SV=3	24	7	22	7	264	27.5	8.38	43.74	131.2	130.5	132.7	66.2	69.2	70.3	1.91735	1.41e-06	0.939117	16854
Q9D3P8	Plgrkt	Plasminogen receptor (KT) OS=Mus musculus OX=10090 GN=Plgrkt PE=1 SV=1	7	1	2	1	147	17.3	9.5	5.63	136.6	126	131.5	68.3	71.5	66.2	1.91311	5.25e-05	0.935918	67759
A0A140T8N2	Igkv5-48	Protein Igkv5-48 (Fragment) OS=Mus musculus OX=10090 GN=Igkv5-48 PE=1 SV=2	10	1	1	1	115	12.6	5.94	3.78	123.9	147.8	122.2	69.3	71.1	65.6	1.91214	0.001745	0.935185	-
A0A0R4J0B2	Plbd1	Phospholipase B-like OS=Mus musculus OX=10090 GN=Plbd1 PE=1 SV=1	19	9	12	9	550	63	8.87	13.29	135.3	128.3	130.3	66.1	68.3	71.7	1.91121	1.88e-05	0.934485	66857
P29351	Ptpn6	Tyrosine-protein phosphatase non-receptor type 6 OS=Mus musculus OX=10090 GN=Ptpn6 PE=1 SV=2	35	21	32	21	595	67.5	7.81	60.51	132	129.5	132	64.7	76	65.8	1.90557	7.22e-05	0.930222	15170
P01915		H-2 class II histocompatibility antigen, E-D beta chain OS=Mus musculus OX=10090 PE=3 SV=1	23	5	7	5	264	30	5.83	17.48	126.5	135.8	131.2	64.6	74.4	67.5	1.90557	9.48e-05	0.930222	#N/A
A0A0R4J256	Psmb9	Proteasome subunit beta type OS=Mus musculus OX=10090 GN=Psmb9 PE=1 SV=1	14	3	4	3	219	23.3	5.01	3.85	138.3	128.1	126.9	72.3	65.7	68.7	1.90276	0.000109	0.928092	16912
Q99LR1	Abhd12	Monoacylglycerol lipase ABHD12 OS=Mus musculus OX=10090 GN=Abhd12 PE=1 SV=2	11	3	3	3	398	45.2	8.72	5.32	132.1	138.3	122.8	57.7	85.4	63.6	1.90227	0.002877	0.927725	76192
Q61233	Lcp1	Plastin-2 OS=Mus musculus OX=10090 GN=Lcp1 PE=1 SV=4	54	29	82	25	627	70.1	5.33	146.55	132.8	128.2	131.6	69.1	69.8	68.6	1.89205	1.68e-06	0.919949	18826
P14211	Calr	Calreticulin OS=Mus musculus OX=10090 GN=Calr PE=1 SV=1	56	23	65	23	416	48	4.49	131.24	135	126.1	131.3	70	68.1	69.5	1.89017	2.01e-05	0.918518	12317
Q9JLJ1	Selenok	Selenoprotein K OS=Mus musculus OX=10090 GN=Selenok PE=1 SV=3	10	1	1	1	94	10.6	10.86	1.92	129.4	140.4	122.6	63.3	77.6	66.7	1.89017	0.000798	0.918518	80795
A0A140T8N5	Igkv6-23	Immunoglobulin kappa variable 6-23 (Fragment) OS=Mus musculus OX=10090 GN=Igkv6-23 PE=4 SV=2	26	2	8	1	115	12.8	5.73	14.31	135.9	127.6	128.8	67.4	75.2	65	1.88969	0.000106	0.918151	-
Q60668	Hnrnpd	Heterogeneous nuclear ribonucleoprotein D0 OS=Mus musculus OX=10090 GN=Hnrnpd PE=1 SV=2	27	10	21	1	355	38.3	7.81	41.69	94.7	130.2	167.2	76.1	59.3	72.6	1.8851	0.046488	0.914638	11991
Q9EP73	Cd274	Programmed cell death 1 ligand 1 OS=Mus musculus OX=10090 GN=Cd274 PE=1 SV=1	6	2	2	2	290	32.8	6.23	4.65	132.1	131.8	128	66.7	72	69.4	1.88323	7.05e-06	0.913208	60533
A0A075B5Q6	Ighv5-9-1	Immunoglobulin heavy variable 5-9-1 OS=Mus musculus OX=10090 GN=Ighv5-9-1 PE=1 SV=1	19	2	4	2	116	13.1	8.87	4.84	126.9	132.9	132.1	64.5	65.9	77.8	1.88233	0.000187	0.912516	-
P01638		Ig kappa chain V-V region L6 (Fragment) OS=Mus musculus OX=10090 PE=4 SV=1	36	3	5	3	115	13	7.81	12.42	135.9	127.9	127.9	65	71.3	71.9	1.88136	6.02e-05	0.911779	#N/A
P20491	Fcer1g	High affinity immunoglobulin epsilon receptor subunit gamma OS=Mus musculus OX=10090 GN=Fcer1g PE=1 SV=1	26	3	3	3	86	9.6	7.97	5.94	127.9	132.1	131.7	66.4	68.5	73.4	1.88046	1.58e-05	0.911086	14127
Q9CYA0	Creld2	Cysteine-rich with EGF-like domain protein 2 OS=Mus musculus OX=10090 GN=Creld2 PE=1 SV=1	34	13	21	13	350	38.2	4.58	41.37	130.2	129.9	131.4	69.1	71.4	68	1.8777	6.37e-07	0.908965	76737
Q542I8	Itgb2	Integrin beta OS=Mus musculus OX=10090 GN=Itgb2 PE=1 SV=1	41	25	46	24	770	84.8	7.05	87.91	131.1	129.3	130.8	63.6	81.7	63.4	1.87446	0.000565	0.906476	16414
P11672	Lcn2	Neutrophil gelatinase-associated lipocalin OS=Mus musculus OX=10090 GN=Lcn2 PE=1 SV=1	25	5	11	5	200	22.9	8.81	16.85	134	128.7	128	69	71.1	69.3	1.86581	7.21e-06	0.8998	16819
Q80ZP8	Manf	Armet protein OS=Mus musculus OX=10090 GN=Manf PE=1 SV=1	53	11	30	11	165	19	8.13	36.44	132.4	129.9	128.3	68.5	71.5	69.4	1.86533	2.2e-06	0.899431	74840
A0A0A6YXN5	Ighv1-43	Immunoglobulin heavy variable V1-43 (Fragment) OS=Mus musculus OX=10090 GN=Ighv1-43 PE=4 SV=1	40	4	5	1	117	13	8.73	11.87	124.2	126.5	139.7	73.4	71	65.2	1.8626	0.000369	0.897314	-
Q497J0	BC100530	MCG130175, isoform CRA_b OS=Mus musculus OX=10090 GN=BC100530 PE=1 SV=1	48	5	8	4	97	11	6.79	10.61	129.5	127.9	132.8	70.2	69.8	69.8	1.85987	2.01e-06	0.895199	-
Q61362	Chi3l1	Chitinase-3-like protein 1 OS=Mus musculus OX=10090 GN=Chi3l1 PE=1 SV=3	23	8	14	8	389	43.9	8.57	24.68	132.6	129.2	128.4	70.2	71.1	68.6	1.85898	2.2e-06	0.894511	-
P51569	Gla	Alpha-galactosidase A OS=Mus musculus OX=10090 GN=Gla PE=1 SV=1	14	5	6	5	419	47.6	5.72	11.71	130.1	132.3	127.7	71	66.1	72.8	1.8585	1.52e-05	0.894142	11605
A0A075B5K9	Igkv12-98	Immunoglobulin kappa variable 12-98 OS=Mus musculus OX=10090 GN=Igkv12-98 PE=4 SV=7	8	1	1	1	114	12.3	7.83	2.58	130	137.5	122.5	75.4	64.4	70.1	1.85803	0.000364	0.893772	-
Q80YX1	Tnc	Tenascin OS=Mus musculus OX=10090 GN=Tnc PE=1 SV=1	6	9	9	9	2110	231.7	4.89	16.36	133.6	125.1	131.1	67.2	70.1	72.9	1.85442	3.78e-05	0.890971	21923
Q9ESY9	Ifi30	Gamma-interferon-inducible lysosomal thiol reductase OS=Mus musculus OX=10090 GN=Ifi30 PE=1 SV=3	10	2	5	2	248	27.8	5.01	9.86	124.6	136.3	128.8	73.7	77.7	58.9	1.85307	0.000853	0.889915	65972
A0A140T8M5	Igkv6-15	Immunoglobulin kappa variable 6-15 (Fragment) OS=Mus musculus OX=10090 GN=Igkv6-15 PE=1 SV=2	40	4	10	3	115	12.7	4.96	16.57	131.1	129.3	129	71.2	65	74.3	1.84988	2.92e-05	0.887432	-
P08030	Aprt	Adenine phosphoribosyltransferase OS=Mus musculus OX=10090 GN=Aprt PE=1 SV=2	17	3	3	3	180	19.7	6.79	7.26	130.3	130.9	127.8	66.7	75.1	69.3	1.84273	2.39e-05	0.881844	11821
Q9D2Y4	Mlkl	Mixed lineage kinase domain-like protein OS=Mus musculus OX=10090 GN=Mlkl PE=1 SV=1	3	2	2	2	472	54.3	8.25	4.39	131.7	130.8	126.4	69.8	64.2	77.1	1.84225	0.00013	0.881473	74568
E9Q748	Slpi	Antileukoproteinase OS=Mus musculus OX=10090 GN=Slpi PE=1 SV=1	36	5	8	5	107	11.9	8.85	17.16	135.1	125.3	128.3	73.5	66.4	71.4	1.83956	7.89e-05	0.879365	20568
Q61093	Cybb	Cytochrome b-245 heavy chain OS=Mus musculus OX=10090 GN=Cybb PE=1 SV=1	13	9	12	9	570	65.3	7.72	14.97	126.8	129.5	132.3	66.1	72.6	72.7	1.83822	2.58e-05	0.87831	13058
A0A0J9YUC8	Alox5ap	Arachidonate 5-lipoxygenase-activating protein OS=Mus musculus OX=10090 GN=Alox5ap PE=1 SV=1	30	2	2	2	73	8.6	9.52	3.09	124.3	128.8	135.3	64	68.9	78.8	1.83467	0.000401	0.875522	11690
A0A0R4IZY6	Prtn3	Myeloblastin OS=Mus musculus OX=10090 GN=Prtn3 PE=1 SV=1	29	5	14	5	254	27.6	7.2	23.27	128.4	128.5	130.9	66.7	71	74.5	1.82752	1.67e-05	0.869888	19152
A0A0G2JFL3	Ighv1-71	Immunoglobulin heavy variable 1-71 (Fragment) OS=Mus musculus OX=10090 GN=Ighv1-71 PE=4 SV=1	18	3	6	2	119	13.4	7.88	13.52	129.1	130	128.5	67.9	74.3	70.2	1.82486	6.99e-06	0.867785	-
Q3UND0	Skap2	Src kinase-associated phosphoprotein 2 OS=Mus musculus OX=10090 GN=Skap2 PE=1 SV=2	23	9	11	9	358	40.7	4.7	23.98	133	126.9	127.6	72.1	67.7	72.7	1.82353	1.97e-05	0.866733	54353
Q64282	Ifit1	Interferon-induced protein with tetratricopeptide repeats 1 OS=Mus musculus OX=10090 GN=Ifit1 PE=1 SV=2	22	10	11	8	463	53.7	7.52	17.47	130.2	126.6	130.5	69	76.8	66.9	1.82087	5.8e-05	0.864631	15957
Q61114	Bpifb1	BPI fold-containing family B member 1 OS=Mus musculus OX=10090 GN=Bpifb1 PE=2 SV=4	1	1	1	1	474	52.4	6.38	1.69	125	125.6	136.7	76	63.8	72.9	1.82087	0.000385	0.864631	228801
Q61635	Ifi47	GTP-binding protein OS=Mus musculus OX=10090 GN=Ifi47 PE=1 SV=1	47	19	26	16	420	46.8	6.74	48.87	132.4	128	126.7	71.1	70.6	71.1	1.81908	4.72e-06	0.863208	15953
E9PXI0	Vav1	Proto-oncogene vav OS=Mus musculus OX=10090 GN=Vav1 PE=1 SV=1	11	11	11	10	821	95.5	6.58	17.54	128	129.4	129.7	71.8	70.4	70.8	1.81737	1.06e-07	0.861853	22324
Q8BYW1	Arhgap25	Rho GTPase-activating protein 25 OS=Mus musculus OX=10090 GN=Arhgap25 PE=1 SV=2	19	14	16	13	648	73.3	6.38	33.46	128.4	128.3	130.3	66.8	77.4	68.8	1.8169	6.27e-05	0.86148	232201
E9QN37	Mpeg1	Macrophage-expressed gene 1 protein OS=Mus musculus OX=10090 GN=Mpeg1 PE=1 SV=1	10	7	9	7	720	79.1	6.04	12.68	129	126.4	131.5	68.5	74.4	70.2	1.81558	1.45e-05	0.860431	17476
Q8R2S8	Cd177	CD177 antigen OS=Mus musculus OX=10090 GN=Cd177 PE=2 SV=1	28	19	29	19	817	87	5.67	52.33	131.5	126	129.3	70.1	69.6	73.5	1.81426	8.73e-06	0.85938	68891
Q8K1X4	Nckap1l	Nck-associated protein 1-like OS=Mus musculus OX=10090 GN=Nckap1l PE=1 SV=1	9	10	10	10	1134	128.8	6.64	14.81	131.6	123.1	132	72	67.4	74	1.81209	7.88e-05	0.857655	105855
Q99J87	Dhx58	Probable ATP-dependent RNA helicase DHX58 OS=Mus musculus OX=10090 GN=Dhx58 PE=1 SV=2	6	5	5	4	678	76.7	8.19	9.02	126.2	128.3	132.1	70.3	69.4	73.8	1.81077	1.23e-05	0.856606	80861
Q9Z1G3	Atp6v1c1	V-type proton ATPase subunit C 1 OS=Mus musculus OX=10090 GN=Atp6v1c1 PE=1 SV=4	29	13	23	13	382	43.9	7.46	29.04	126.2	128.9	131.3	69.7	72.3	71.5	1.80984	4.12e-06	0.855859	66335
P08226	Apoe	Apolipoprotein E OS=Mus musculus OX=10090 GN=Apoe PE=1 SV=2	44	15	26	15	311	35.8	5.68	45.47	131	127.7	127.7	67.8	73.6	72.2	1.80899	9.82e-06	0.855184	11816
Q923B6	Steap4	Metalloreductase STEAP4 OS=Mus musculus OX=10090 GN=Steap4 PE=1 SV=1	24	8	10	8	470	53	9.17	24.12	128.5	123.3	134.4	71.9	73.3	68.5	1.80721	8.12e-05	0.853761	117167
Q9Z0M5	Lipa	Lysosomal acid lipase/cholesteryl ester hydrolase OS=Mus musculus OX=10090 GN=Lipa PE=1 SV=2	5	3	4	3	397	45.3	8.07	10.2	131.7	124.5	130	69.3	71.4	73	1.80721	1.87e-05	0.853761	16889
Q8BMS9	Rassf2	Ras association domain-containing protein 2 OS=Mus musculus OX=10090 GN=Rassf2 PE=1 SV=1	21	7	10	7	326	37.9	7.94	12.69	125.8	130.1	130.1	70.7	68.9	74.4	1.80374	1.2e-05	0.85099	215653
P14234	Fgr	Tyrosine-protein kinase Fgr OS=Mus musculus OX=10090 GN=Fgr PE=1 SV=2	7	4	4	3	517	58.8	5.38	7.34	130.8	122.5	132.2	68.2	73.3	73	1.7972	7.85e-05	0.845753	14191
P01837	Igkc	Immunoglobulin kappa constant OS=Mus musculus OX=10090 GN=Igkc PE=1 SV=2	81	6	53	6	107	11.9	5.9	89.05	127.2	128.5	129.7	69.7	73.2	71.7	1.7959	1.37e-06	0.844706	-
Q8CGP7	Hist1h2ak	Histone H2A type 1-K OS=Mus musculus OX=10090 GN=Hist1h2ak PE=1 SV=3	60	6	28	1	130	14.1	11.05	52	133	143.2	109	51.1	109.6	54.2	1.79246	0.05785	0.841943	-
Q3ULG5	Mcm6	DNA helicase OS=Mus musculus OX=10090 GN=Mcm6 PE=1 SV=1	9	7	9	7	794	89.7	5.9	10.09	120.5	137.1	126.7	70.7	71.6	73.4	1.78164	0.000332	0.833207	17219
S4R2U7	Celf2	CUGBP Elav-like family member 2 OS=Mus musculus OX=10090 GN=Celf2 PE=1 SV=1	8	3	3	3	460	48.8	9.09	4.31	133.9	121.5	128.6	71.2	71	73.8	1.77778	0.000112	0.830075	14007
Q9Z0J0	Npc2	NPC intracellular cholesterol transporter 2 OS=Mus musculus OX=10090 GN=Npc2 PE=1 SV=1	42	7	22	7	149	16.4	7.68	48.8	130.5	126.3	127	73.5	72	70.6	1.77603	3.49e-06	0.828656	67963
A0A075B5U7	Ighv1-22	Immunoglobulin heavy variable 1-22 (Fragment) OS=Mus musculus OX=10090 GN=Ighv1-22 PE=1 SV=1	33	3	8	1	117	13	8.76	9.82	128	129.1	126.7	70.6	75.4	70.2	1.77521	6.55e-06	0.827988	-
P23780	Glb1	Beta-galactosidase OS=Mus musculus OX=10090 GN=Glb1 PE=1 SV=1	5	3	4	3	647	73.1	7.47	7.5	128.1	129.1	126.6	77.1	69.9	69.2	1.77521	2.89e-05	0.827988	12091
Q9EPR5	Sorcs2	VPS10 domain-containing receptor SorCS2 OS=Mus musculus OX=10090 GN=Sorcs2 PE=1 SV=2	2	2	2	2	1159	128.8	7.34	4.07	137.1	125.2	121.4	76.6	69.8	69.9	1.77392	0.000439	0.826945	81840
A0A0G2JGD2	S100a4	Protein S100-A4 (Fragment) OS=Mus musculus OX=10090 GN=S100a4 PE=1 SV=1	22	3	4	3	78	9.1	5.21	5.53	133.8	125.7	124.2	68.5	74.6	73.2	1.77392	9.11e-05	0.826945	20198
P04441	Cd74	H-2 class II histocompatibility antigen gamma chain OS=Mus musculus OX=10090 GN=Cd74 PE=1 SV=3	22	6	9	6	279	31.5	8.34	13.11	127.3	127.8	128.6	70	73.7	72.7	1.7731	1.15e-06	0.826278	16149
P97797	Sirpa	Tyrosine-protein phosphatase non-receptor type substrate 1 OS=Mus musculus OX=10090 GN=Sirpa PE=1 SV=1	9	4	4	4	513	56.4	8.15	8.18	129.6	126.7	127	69	77	70.6	1.76962	2.89e-05	0.82344	19261
Q8CIH5	Plcg2	1-phosphatidylinositol 4,5-bisphosphate phosphodiesterase gamma-2 OS=Mus musculus OX=10090 GN=Plcg2 PE=1 SV=1	14	16	20	16	1265	147.5	6.77	30.53	127.7	126.5	129.1	71.6	73.8	71.3	1.7688	8.84e-07	0.822775	234779
P01631		Ig kappa chain V-II region 26-10 OS=Mus musculus OX=10090 PE=1 SV=1	33	2	6	2	113	12.3	8.88	9.84	133.1	122.8	127.4	72.4	72.8	71.5	1.7688	5.04e-05	0.822775	#N/A
Q9JLF6	Tgm1	Protein-glutamine gamma-glutamyltransferase K OS=Mus musculus OX=10090 GN=Tgm1 PE=1 SV=2	5	4	4	4	815	89.8	6.51	4.21	128.3	129.5	125.3	72.3	72.6	72.1	1.76544	1.59e-06	0.820026	21816
Q921M7	Fam49b	Protein FAM49B OS=Mus musculus OX=10090 GN=Fam49b PE=1 SV=1	40	11	11	10	324	36.8	6.06	22.45	132.9	125	125.2	68.4	76.3	72.3	1.76544	8.91e-05	0.820026	-
Q8VEM1	Rnf130	E3 ubiquitin-protein ligase RNF130 OS=Mus musculus OX=10090 GN=Rnf130 PE=2 SV=1	2	1	2	1	419	46.3	8.92	3.11	134.2	117.5	131	72	76.6	68.6	1.76197	0.000603	0.81719	59044
P35821	Ptpn1	Tyrosine-protein phosphatase non-receptor type 1 OS=Mus musculus OX=10090 GN=Ptpn1 PE=1 SV=2	15	6	10	6	432	49.6	6.16	18.24	129	126.3	127.4	74.4	66.3	76.6	1.76116	6.9e-05	0.816526	19246
Q8BFQ1	Psap	Prosaposin OS=Mus musculus OX=10090 GN=Psap PE=1 SV=1	29	15	23	15	554	61	5.24	40.79	127.1	127.3	128.3	69.3	72.5	75.5	1.76116	7.2e-06	0.816526	19156
G3XA18	Naaa	N-acylethanolamine-hydrolyzing acid amidase OS=Mus musculus OX=10090 GN=Naaa PE=1 SV=1	8	2	3	2	360	39.8	6.44	2.65	125	127.8	129.7	68.6	80.9	68	1.75862	0.00024	0.814445	67111
Q8CGE8	Ifi205a	Interferon-activable protein 205-A OS=Mus musculus OX=10090 GN=Ifi205a PE=2 SV=1	12	5	5	2	404	45.1	8.48	7.19	122.4	131	129.1	72.4	79.9	65.3	1.75781	0.000376	0.813782	-
Q7TMR0	Prcp	Lysosomal Pro-X carboxypeptidase OS=Mus musculus OX=10090 GN=Prcp PE=1 SV=2	4	2	3	2	491	55	6.79	5.81	129.5	127	125.9	78	63.7	75.9	1.75735	0.000278	0.813404	72461
P17182	Eno1	Alpha-enolase OS=Mus musculus OX=10090 GN=Eno1 PE=1 SV=3	46	20	63	17	434	47.1	6.8	111.39	130.7	124.8	126.8	72	73.1	72.5	1.75689	6.31e-06	0.813026	13806
P12265	Gusb	Beta-glucuronidase OS=Mus musculus OX=10090 GN=Gusb PE=1 SV=2	10	5	7	5	648	74.1	6.7	7.58	132.3	121.1	128.8	74.2	67.8	75.8	1.75482	0.000183	0.811324	110006
P30681	Hmgb2	High mobility group protein B2 OS=Mus musculus OX=10090 GN=Hmgb2 PE=1 SV=3	44	13	28	10	210	24.1	7.31	37.23	129.5	128.1	124.5	74.2	73.6	70.1	1.75356	9.84e-06	0.810284	97165
Q8BFR4	Gns	N-acetylglucosamine-6-sulfatase OS=Mus musculus OX=10090 GN=Gns PE=1 SV=1	15	7	11	7	544	61.1	8.24	20.89	128	127.3	126.6	71.9	72.8	73.4	1.75103	8.42e-08	0.808205	75612
A0A140T8M2	Igkv12-44	Immunoglobulin kappa variable 12-44 (Fragment) OS=Mus musculus OX=10090 GN=Igkv12-44 PE=4 SV=2	28	3	12	1	115	12.5	7.87	27.85	126.9	126	128.9	75.7	66.6	75.8	1.75057	6.67e-05	0.807827	-
A0A1W2P7X0	Abracl	Costars family protein ABRACL (Fragment) OS=Mus musculus OX=10090 GN=Abracl PE=1 SV=1	16	1	1	1	57	6.4	8.92	3.63	125	123.2	133.5	81	63.7	73.6	1.74851	0.000782	0.806127	73112
F8VQ94	Pira2	Paired-Ig-like receptor A2 OS=Mus musculus OX=10090 GN=Pira2 PE=4 SV=1	3	2	2	1	680	75.6	7.99	4.68	129.6	140.6	111.3	77.7	72.9	67.8	1.7468	0.003804	0.80471	18725
Q8CAK1	Iba57	Putative transferase CAF17 homolog, mitochondrial OS=Mus musculus OX=10090 GN=Iba57 PE=1 SV=1	10	3	3	3	358	38.4	9.01	5.99	123.9	140.9	116.6	75.3	70.3	72.9	1.74554	0.001783	0.803672	216792
Q3TIR3	Ric8a	Synembryn-A OS=Mus musculus OX=10090 GN=Ric8a PE=1 SV=2	10	4	4	4	530	59.8	5.68	2.19	126.7	124.9	129.7	70.2	66.1	82.3	1.74428	0.00043	0.802633	101489
P30275	Ckmt1	Creatine kinase U-type, mitochondrial OS=Mus musculus OX=10090 GN=Ckmt1 PE=1 SV=1	22	9	10	7	418	47	8.16	20.52	122.7	128.7	129.7	72.8	74.3	71.7	1.74177	1.98e-05	0.800557	12716
Q9R155	Slc26a4	Pendrin OS=Mus musculus OX=10090 GN=Slc26a4 PE=1 SV=1	3	2	2	2	780	85.6	7.58	3.99	119.3	150.6	111.2	72.9	92.4	53.6	1.74098	0.030164	0.799898	23985
Q99KF1	Tmed9	Transmembrane emp24 domain-containing protein 9 OS=Mus musculus OX=10090 GN=Tmed9 PE=1 SV=2	22	4	8	4	235	27.1	8.41	17.03	130.3	123.4	127.1	73.6	69.2	76.4	1.73723	4.89e-05	0.796785	67511
Q9Z183	Padi4	Protein-arginine deiminase type-4 OS=Mus musculus OX=10090 GN=Padi4 PE=2 SV=3	10	7	10	7	666	74.4	7.15	14.33	126.9	122.5	131.3	73.1	71.9	74.3	1.73598	3.39e-05	0.795749	18602
A0A0G2JDE1	Ighv8-12	Immunoglobulin heavy variable V8-12 (Fragment) OS=Mus musculus OX=10090 GN=Ighv8-12 PE=1 SV=1	13	1	2	1	119	13.3	9.17	8.77	139.1	123.1	118.5	84.5	68.5	66.3	1.73598	0.003158	0.795749	-
Q3U2P1	Sec24a	Protein transport protein Sec24A OS=Mus musculus OX=10090 GN=Sec24a PE=1 SV=1	3	4	4	4	1090	118.7	7.83	2.1	128	130.3	122.2	76.1	71.2	72.1	1.73428	4.62e-05	0.794333	77371
A0A075B5V8	Ighv1-47	Immunoglobulin heavy variable 1-47 OS=Mus musculus OX=10090 GN=Ighv1-47 PE=4 SV=1	7	1	1	1	98	11.1	8.4	2.04	123.5	127.1	129.9	72.7	73.7	73.2	1.7327	8.88e-06	0.793019	-
Q5PR72	Pde2a	Phosphodiesterase OS=Mus musculus OX=10090 GN=Pde2a PE=1 SV=1	6	5	6	5	935	105.2	5.41	5.53	124.3	127.1	129	74.1	74.5	71.1	1.73145	6.58e-06	0.791982	207728
O70138	Mmp8	Neutrophil collagenase OS=Mus musculus OX=10090 GN=Mmp8 PE=2 SV=2	8	4	4	4	465	53.1	7.03	7.54	124.7	135.6	119.8	77.3	72.5	70	1.7293	0.000483	0.790187	17394
P18531	Ighv3-6	Ig heavy chain V region 3-6 OS=Mus musculus OX=10090 GN=Ighv3-6 PE=1 SV=1	19	2	3	2	116	13.1	8.78	8.15	135.5	117	127.6	84	61.1	74.9	1.72773	0.003352	0.788875	-
Q9ERI2	Rab27a	Ras-related protein Rab-27A OS=Mus musculus OX=10090 GN=Rab27a PE=1 SV=1	24	5	9	5	221	25	5.36	20.36	128.5	123.2	128.2	72.7	67.1	80.2	1.72682	0.000215	0.788116	11891
P16045	Lgals1	Galectin-1 OS=Mus musculus OX=10090 GN=Lgals1 PE=1 SV=3	50	6	21	6	135	14.9	5.49	47.39	127.4	126.9	125.6	71	75.3	73.9	1.72525	2.66e-06	0.786805	16852
Q9Z0I7	Slfn1	Schlafen 1 OS=Mus musculus OX=10090 GN=Slfn1 PE=1 SV=1	12	3	3	3	337	38	7.33	2.87	125.7	125.7	128.4	73.5	67.9	78.8	1.7248	8.38e-05	0.786426	20555
A0A0B4J1E6	Fcgr2b	Fc receptor, IgG, low affinity IIb OS=Mus musculus OX=10090 GN=Fcgr2b PE=1 SV=1	16	5	6	3	340	37.8	6.73	2.47	129.4	119.1	131.2	78	64	78.2	1.72434	0.00091	0.786046	14130
Q8VI93	Oas3	2'-5'-oligoadenylate synthase 3 OS=Mus musculus OX=10090 GN=Oas3 PE=1 SV=1	7	7	7	7	1138	126.3	8.72	11.79	123.7	120.6	135.3	74.4	69.3	76.6	1.72311	0.000434	0.785011	246727
Q9JL16	Isg20	Interferon-stimulated gene 20 kDa protein OS=Mus musculus OX=10090 GN=Isg20 PE=1 SV=1	14	5	6	5	300	32.5	8.15	8.14	127.9	124.9	126.7	71.6	73.1	75.7	1.72187	3.63e-06	0.783975	57444
P43404	Zap70	Tyrosine-protein kinase ZAP-70 OS=Mus musculus OX=10090 GN=Zap70 PE=1 SV=3	2	1	1	1	618	70.1	7.83	2.63	133.4	122.8	123.1	75.7	65.2	79.8	1.71862	0.000688	0.781253	22637
Q64345	Ifit3	Interferon-induced protein with tetratricopeptide repeats 3 OS=Mus musculus OX=10090 GN=Ifit3 PE=1 SV=1	26	11	13	10	403	47.2	5.64	28.05	124.4	126.6	128.1	72.6	75	73.3	1.71616	2.14e-06	0.779185	15959
Q9ESP1	Sdf2l1	Stromal cell-derived factor 2-like protein 1 OS=Mus musculus OX=10090 GN=Sdf2l1 PE=1 SV=2	24	4	7	4	221	23.6	7.42	19.34	126.2	130.8	122.1	72.3	77.1	71.5	1.71616	6.66e-05	0.779185	64136
P97369	Ncf4	Neutrophil cytosol factor 4 OS=Mus musculus OX=10090 GN=Ncf4 PE=1 SV=2	26	7	9	7	339	38.7	6.21	10.83	128.5	127.2	123.3	75.2	70.5	75.3	1.71493	1.89e-05	0.778151	17972
G5E8F1	Itgam	Integrin alpha-M OS=Mus musculus OX=10090 GN=Itgam PE=1 SV=2	16	17	21	17	1154	127.5	7.25	35.13	123.6	126.5	128.8	72.9	74.5	73.6	1.71448	4.77e-06	0.777771	16409
E9PYI3	Plcb2	Phosphoinositide phospholipase C OS=Mus musculus OX=10090 GN=Plcb2 PE=1 SV=1	2	2	2	2	1158	131.8	5.95	2.35	123.1	129.2	126.6	60.7	84.1	76.3	1.7137	0.001773	0.777118	18796
Q9QXJ2	Stat2	Signal transducer and activator of transcription OS=Mus musculus OX=10090 GN=Stat2 PE=1 SV=1	8	6	7	6	922	105.3	5.21	7.14	126.1	125.1	127.6	69.3	80.8	71.1	1.71248	0.000135	0.776085	20847
O35604	Npc1	NPC intracellular cholesterol transporter 1 OS=Mus musculus OX=10090 GN=Npc1 PE=1 SV=2	3	5	6	5	1277	142.8	5.71	4.22	126.9	121.3	130	72.8	76	72.9	1.70591	4.58e-05	0.770541	18145
Q8R4K2	Irak4	Interleukin-1 receptor-associated kinase 4 OS=Mus musculus OX=10090 GN=Irak4 PE=1 SV=1	4	2	2	2	459	50.8	5.4	4.31	127.8	126.1	124.3	75.2	73.8	72.8	1.70514	1.83e-06	0.76989	266632
Q5SUA5	Myo1g	Unconventional myosin-Ig OS=Mus musculus OX=10090 GN=Myo1g PE=1 SV=1	12	10	11	9	1024	117.2	8.59	22.77	124.7	122.9	130.4	69.3	76	76.7	1.7027	9.11e-05	0.767827	246177
A0A0A6YXA5	Ighv1-15	Immunoglobulin heavy variable 1-15 (Fragment) OS=Mus musculus OX=10090 GN=Ighv1-15 PE=4 SV=1	21	2	3	1	117	12.9	5.86	2.82	124.2	138.8	114.8	67.1	80.4	74.7	1.70027	0.002883	0.765764	-
D3Z512	Dnase2a	Deoxyribonuclease II alpha OS=Mus musculus OX=10090 GN=Dnase2a PE=1 SV=1	12	4	6	4	332	36.5	7.77	11.37	132.2	125.1	120.4	81.1	74.8	66.5	1.69829	0.000683	0.764084	100503676
P10404		MLV-related proviral Env polyprotein OS=Mus musculus OX=10090 PE=1 SV=3	9	5	6	5	641	69.6	7.96	14.56	124.6	125.8	127.2	69.4	79	74	1.69784	5.58e-05	0.763702	#N/A
A0A1B0GRS5	Msr1	Macrophage scavenger receptor types I and II (Fragment) OS=Mus musculus OX=10090 GN=Msr1 PE=1 SV=1	5	1	1	1	213	24.1	5.22	2.98	119.1	134.4	124	74	79.3	69.1	1.69739	0.000659	0.76332	20288
Q9DCD0	Pgd	6-phosphogluconate dehydrogenase, decarboxylating OS=Mus musculus OX=10090 GN=Pgd PE=1 SV=3	30	16	45	16	483	53.2	7.23	90.66	128.1	123.8	125.6	73.3	73.1	76.1	1.69663	5.2e-06	0.762671	110208
P10107	Anxa1	Annexin A1 OS=Mus musculus OX=10090 GN=Anxa1 PE=1 SV=2	54	19	47	18	346	38.7	7.37	99.52	127	126.8	123.7	72.5	77.3	72.7	1.69663	1.08e-05	0.762671	16952
P01679		Ig kappa chain V-VI region J539 OS=Mus musculus OX=10090 PE=1 SV=1	17	1	1	1	107	11.5	8.46	3.33	113	130.5	133.8	82.1	72.4	68.2	1.69421	0.002536	0.76061	#N/A
Q9JHP7	Kdelc1	KDEL motif-containing protein 1 OS=Mus musculus OX=10090 GN=Kdelc1 PE=1 SV=1	3	2	2	2	502	57.9	7.9	2.28	119.6	129.5	128.2	77.3	65.2	80.2	1.69421	0.000746	0.76061	-
P43275	Hist1h1a	Histone H1.1 OS=Mus musculus OX=10090 GN=Hist1h1a PE=1 SV=2	31	7	30	4	213	21.8	10.93	67.76	129.7	122.4	125	72.2	76.7	74	1.69179	3.33e-05	0.75855	-
Q9ERD8	Parvg	Gamma-parvin OS=Mus musculus OX=10090 GN=Parvg PE=1 SV=2	4	1	1	1	331	37.6	5.66	2.14	139.6	122	115.5	63.4	90.9	68.6	1.69179	0.009769	0.75855	64099
P35173	Stfa3	Stefin-3 OS=Mus musculus OX=10090 GN=Stfa3 PE=3 SV=1	30	3	6	2	103	11.6	6.11	12.85	120.1	125.2	131.7	78.9	68.9	75.1	1.69134	0.00032	0.758168	20863
Q9EPL9	Acox3	Peroxisomal acyl-coenzyme A oxidase 3 OS=Mus musculus OX=10090 GN=Acox3 PE=1 SV=2	9	5	6	5	700	78.4	7.12	10.29	122.9	128.2	125.9	74.2	72.5	76.3	1.69058	1.09e-05	0.757521	80911
P97310	Mcm2	DNA replication licensing factor MCM2 OS=Mus musculus OX=10090 GN=Mcm2 PE=1 SV=3	12	10	13	10	904	102	5.72	28.38	127.4	124.7	125	73.3	75.1	74.7	1.69027	9.1e-07	0.757256	17216
A0A140T8P6	Igkv12-46	Immunoglobulin kappa variable 12-46 (Fragment) OS=Mus musculus OX=10090 GN=Igkv12-46 PE=1 SV=2	24	2	6	1	115	12.6	5.91	8.73	133	124.6	119.3	68.9	77.3	76.8	1.69013	0.000444	0.757138	-
Q3U2S8	Hvcn1	Voltage-gated hydrogen channel 1 OS=Mus musculus OX=10090 GN=Hvcn1 PE=1 SV=2	4	1	1	1	269	31.2	7.06	3.41	117.2	142.3	116.9	64.6	88.2	70.8	1.68336	0.009769	0.751346	74096
Q61553	Fscn1	Fascin OS=Mus musculus OX=10090 GN=Fscn1 PE=1 SV=4	15	7	9	7	493	54.5	6.89	15.85	129	124.7	122.2	77.9	71.9	74.4	1.67663	4.38e-05	0.745563	14086
P01741		Ig heavy chain V region OS=Mus musculus OX=10090 PE=1 SV=1	11	1	2	1	114	12.5	5.06	2.91	130.7	117.6	126.9	80.4	70.2	74.1	1.66978	0.000511	0.73966	#N/A
O35955	Psmb10	Proteasome subunit beta type-10 OS=Mus musculus OX=10090 GN=Psmb10 PE=1 SV=1	12	3	4	3	273	29	6.87	10.85	123.9	125	126.4	73.1	75.6	76.2	1.66874	1.92e-06	0.738761	19171
Q9R1T4	44810	Septin-6 OS=Mus musculus OX=10090 GN=Sept6 PE=1 SV=4	25	10	16	5	434	49.6	6.43	19.15	129.8	124.2	121.1	73.5	75	76.4	1.66785	4.83e-05	0.737991	-
P45878	Fkbp2	Peptidyl-prolyl cis-trans isomerase FKBP2 OS=Mus musculus OX=10090 GN=Fkbp2 PE=1 SV=1	29	5	12	5	140	15.3	8.88	23.99	127.3	125.9	121.6	71.9	80.5	72.8	1.6643	0.000102	0.734914	114841036
Q9CQI6	Cotl1	Coactosin-like protein OS=Mus musculus OX=10090 GN=Cotl1 PE=1 SV=3	51	7	15	7	142	15.9	5.4	35.33	125.2	123.4	126	74.3	76.3	74.8	1.66193	8.87e-07	0.732863	72042
Q8BGC4	Zadh2	Prostaglandin reductase-3 OS=Mus musculus OX=10090 GN=Zadh2 PE=1 SV=1	21	7	9	7	377	40.5	7.42	16.04	123.7	125.4	125.5	76.4	74.1	74.9	1.66193	6.19e-07	0.732863	225791
A0A0G2JFA8	Igkv17-121	Immunoglobulin kappa variable 17-121 (Fragment) OS=Mus musculus OX=10090 GN=Igkv17-121 PE=4 SV=4	33	2	6	2	117	12.9	4.36	7.86	130.2	120	124.1	74.1	72	79.7	1.65766	0.00019	0.72915	-
Q62314	Tgoln2	Trans-Golgi network integral membrane protein 2 OS=Mus musculus OX=10090 GN=Tgoln2 PE=1 SV=1	6	2	3	2	363	38.8	5.22	2.75	125.7	118.2	130	68.3	77.4	80.3	1.65443	0.000591	0.72633	-
P08508	Fcgr3	Low affinity immunoglobulin gamma Fc region receptor III OS=Mus musculus OX=10090 GN=Fcgr3 PE=1 SV=1	10	3	4	1	261	30	9.29	2.47	122	122.4	129.5	94.7	75.5	55.8	1.65443	0.012743	0.72633	14131
A0A075B5S2	Ighv7-1	Uncharacterized protein (Fragment) OS=Mus musculus OX=10090 GN=Ighv7-1 PE=1 SV=2	17	2	2	1	121	13.6	8.29	3.87	120.9	129.6	123.3	80.1	80.1	66	1.65252	0.000787	0.724668	-
O89053	Coro1a	Coronin-1A OS=Mus musculus OX=10090 GN=Coro1a PE=1 SV=5	33	16	35	15	461	51	6.48	51.99	120.9	127.8	124.9	74.5	75.5	76.3	1.65091	1.86e-05	0.723258	12721
Q91XA2	Golm1	Golgi membrane protein 1 OS=Mus musculus OX=10090 GN=Golm1 PE=1 SV=2	16	6	6	6	393	44.3	5.27	6.55	127	122.9	123.6	75.7	74	76.8	1.64901	5.31e-06	0.721598	105348
P06802	Enpp1	Ectonucleotide pyrophosphatase/phosphodiesterase family member 1 OS=Mus musculus OX=10090 GN=Enpp1 PE=1 SV=4	6	4	4	4	906	103.1	6.6	8.95	125.4	128.4	119.6	78.1	74.7	73.9	1.64711	7.11e-05	0.719938	18605
P29416	Hexa	Beta-hexosaminidase subunit alpha OS=Mus musculus OX=10090 GN=Hexa PE=1 SV=2	18	9	13	9	528	60.6	6.54	30.68	124.3	126	123	75	78.5	73.2	1.64667	1.05e-05	0.719551	15211
Q31094	H2-DMb1	Class II histocompatibility antigen, M beta 1 chain OS=Mus musculus OX=10090 GN=H2-DMb1 PE=1 SV=2	18	4	5	4	261	28.9	6.4	3.94	122.5	133.1	117.7	71.7	78.6	76.5	1.64594	0.000609	0.718915	14999
Q64281	Lilrb4	Leukocyte immunoglobulin-like receptor subfamily B member 4 OS=Mus musculus OX=10090 GN=Lilrb4 PE=1 SV=1	2	1	1	1	335	37.5	6.21	1.61	128	124.6	120.5	85.3	68.9	72.6	1.64506	0.000844	0.718142	-
Q9CR51	Atp6v1g1	V-type proton ATPase subunit G 1 OS=Mus musculus OX=10090 GN=Atp6v1g1 PE=1 SV=3	12	2	3	2	118	13.7	7.97	7.62	124	123.9	125	73.3	79.4	74.4	1.64201	1.42e-05	0.715461	66290
P11031	Sub1	Activated RNA polymerase II transcriptional coactivator p15 OS=Mus musculus OX=10090 GN=Sub1 PE=1 SV=3	46	7	14	7	127	14.4	9.6	17.81	128.4	122.2	122.2	72.8	77.4	76.9	1.64157	4.33e-05	0.715075	20024
P01897	H2-L	H-2 class I histocompatibility antigen, L-D alpha chain OS=Mus musculus OX=10090 GN=H2-L PE=1 SV=2	38	12	27	7	362	40.7	6.25	41.62	124.2	124.5	124.1	74.1	77.3	75.8	1.64085	8.14e-07	0.714439	-
P59999	Arpc4	Actin-related protein 2/3 complex subunit 4 OS=Mus musculus OX=10090 GN=Arpc4 PE=1 SV=3	46	7	14	7	168	19.7	8.43	24.51	125.1	124.2	123.4	74.2	79.5	73.7	1.63896	1.46e-05	0.712782	68089
Q9Z2G9	Htatip2	Oxidoreductase HTATIP2 OS=Mus musculus OX=10090 GN=Htatip2 PE=1 SV=3	10	2	3	2	242	26.9	8.59	2.59	122.2	116.8	133.6	71.4	75.9	80.1	1.63852	0.000954	0.712395	53415
P36423	Tbxas1	Thromboxane-A synthase OS=Mus musculus OX=10090 GN=Tbxas1 PE=1 SV=2	7	3	4	3	533	60.4	7.15	2.89	120.2	122.2	130	72.7	83.4	71.4	1.63692	0.000565	0.710986	21391
D3Z3V3	44805	Septin-1 OS=Mus musculus OX=10090 GN=Sept1 PE=1 SV=1	16	5	7	4	338	38.8	5.47	8.2	127.8	117	127.2	72.1	79.5	76.3	1.6323	0.000306	0.706902	-
O35640	Anxa8	Annexin A8 OS=Mus musculus OX=10090 GN=Anxa8 PE=1 SV=2	12	3	4	3	327	36.7	5.94	4.18	122.5	129.9	119.5	74.4	77.3	76.2	1.63186	0.000116	0.706514	11752
P52624	Upp1	Uridine phosphorylase 1 OS=Mus musculus OX=10090 GN=Upp1 PE=1 SV=2	25	5	5	5	311	34.1	6.58	6.05	119.1	121	131.7	76.8	69.6	81.8	1.62927	0.000823	0.704228	22271
Q9D0B0	Srsf9	Serine/arginine-rich splicing factor 9 OS=Mus musculus OX=10090 GN=Srsf9 PE=1 SV=1	12	3	3	3	222	25.6	8.65	7.87	118.1	129.7	123.8	76.4	78.5	73.4	1.62768	0.000199	0.70282	108014
P99029	Prdx5	Peroxiredoxin-5, mitochondrial OS=Mus musculus OX=10090 GN=Prdx5 PE=1 SV=2	46	8	20	8	210	21.9	8.85	34.13	126.7	123.9	121.1	72.9	74.6	80.9	1.62741	8.19e-05	0.702576	54683
Q60648	Gm2a	Ganglioside GM2 activator OS=Mus musculus OX=10090 GN=Gm2a PE=1 SV=2	13	3	6	3	193	20.8	5.9	6.13	122.2	128.9	120.4	76	79.9	72.5	1.62653	0.000142	0.701799	14667
Q9JHF5	Tcirg1	V-type proton ATPase subunit a OS=Mus musculus OX=10090 GN=Tcirg1 PE=1 SV=1	18	11	15	11	834	93.4	6.38	19.77	122.9	125.2	123.3	72.5	82.9	73.2	1.62467	0.000156	0.700148	27060
B2RV77	Gm5483	MCG130182, isoform CRA_a OS=Mus musculus OX=10090 GN=Gm5483 PE=1 SV=1	57	5	11	5	97	11	8.1	22.89	126.9	119.2	125.2	72.8	75.8	80.1	1.62352	0.000113	0.699129	-
Q8VD31	Tapbpl	Tapasin-related protein OS=Mus musculus OX=10090 GN=Tapbpl PE=1 SV=2	7	4	4	4	451	48.7	6.46	9.68	124.2	123.2	123.9	79.3	75.3	74.2	1.62281	7.25e-06	0.698499	213233
Q9R171	Cbln1	Cerebellin-1 OS=Mus musculus OX=10090 GN=Cbln1 PE=1 SV=1	4	1	1	1	193	21.1	7.28	2.68	125.8	124.8	120.6	73.7	73.8	81.4	1.62167	9.43e-05	0.697479	12404
P24063	Itgal	Integrin alpha-L OS=Mus musculus OX=10090 GN=Itgal PE=1 SV=2	13	12	12	12	1163	128.2	6.11	15.13	122.1	125.5	123.4	74.2	77.4	77.3	1.62079	5.15e-06	0.696702	16408
P57759	Erp29	Endoplasmic reticulum resident protein 29 OS=Mus musculus OX=10090 GN=Erp29 PE=1 SV=2	17	4	9	4	262	28.8	6.15	10.12	126	122.3	122.5	74.3	75.6	79.2	1.61851	1.54e-05	0.694664	67397
A0A0B4J1H7	Igkv1-135	Immunoglobulin kappa variable 1-135 (Fragment) OS=Mus musculus OX=10090 GN=Igkv1-135 PE=4 SV=1	33	4	9	4	120	13.3	7.12	20.08	126	123.3	121.4	79.4	74.9	75	1.61666	1.91e-05	0.693015	-
Q9D1A2	Cndp2	Cytosolic non-specific dipeptidase OS=Mus musculus OX=10090 GN=Cndp2 PE=1 SV=1	32	13	24	13	475	52.7	5.66	37.41	126.1	120.6	123.9	76.5	72.8	80	1.61622	5.65e-05	0.692626	66054
Q9QXH4	Itgax	Integrin alpha-X OS=Mus musculus OX=10090 GN=Itgax PE=1 SV=1	9	9	10	9	1169	129.1	6.64	5.99	121	125.6	124	77.6	77	74.7	1.61622	8.17e-06	0.692626	16411
P97496	Smarcc1	SWI/SNF complex subunit SMARCC1 OS=Mus musculus OX=10090 GN=Smarcc1 PE=1 SV=2	5	6	9	1	1104	122.8	5.73	21.15	117.5	121.3	131.9	77.7	78.1	73.6	1.61596	0.000488	0.692387	20588
Q9DC16	Ergic1	Endoplasmic reticulum-Golgi intermediate compartment protein 1 OS=Mus musculus OX=10090 GN=Ergic1 PE=1 SV=1	18	5	8	5	290	32.5	7.06	14.33	124.3	127.6	118.8	72.6	78.2	78.6	1.61596	0.000126	0.692387	67458
A0A075B5N2	Igkv6-29	Immunoglobulin kappa chain variable 6-29 OS=Mus musculus OX=10090 GN=Igkv6-29 PE=4 SV=7	8	1	2	1	114	12.6	5.01	4.33	120.7	122.4	127.3	79.1	73.6	76.9	1.61324	5.07e-05	0.689961	-
P28867	Prkcd	Protein kinase C delta type OS=Mus musculus OX=10090 GN=Prkcd PE=1 SV=3	16	13	14	13	674	77.5	7.39	19.88	127.2	122.5	120.7	76.1	76.2	77.4	1.61254	1.89e-05	0.689333	18753
A0A0B4J1J0	Igkv4-50	Immunoglobulin kappa variable 4-50 (Fragment) OS=Mus musculus OX=10090 GN=Igkv4-50 PE=4 SV=1	12	1	2	1	117	12.8	5.19	6.26	119.4	134.2	116.4	81.7	76.4	71.8	1.60939	0.001665	0.686518	-
P01887	B2m	Beta-2-microglobulin OS=Mus musculus OX=10090 GN=B2m PE=1 SV=2	16	2	7	2	119	13.8	8.44	7.69	127.8	120.1	122.2	72.7	76	81.3	1.60913	0.000163	0.686281	12010
Q61107	Gbp4	Guanylate-binding protein 4 OS=Mus musculus OX=10090 GN=Gbp4 PE=1 SV=1	9	5	5	3	620	70.8	6.64	5	124.7	121.2	124.1	79.3	69	81.8	1.608	0.000329	0.685265	17472
Q8CFB4	Gbp5	Guanylate-binding protein 5 OS=Mus musculus OX=10090 GN=Gbp5 PE=1 SV=2	13	7	8	7	590	66.9	6.09	6.76	120.1	125.5	124.3	78.3	77.1	74.7	1.60756	1.82e-05	0.684874	229898
P12804	Fgl2	Fibroleukin OS=Mus musculus OX=10090 GN=Fgl2 PE=1 SV=1	4	2	2	2	432	48.9	7.25	2.89	123.6	128	118.3	72.5	73.2	84.5	1.60686	0.000629	0.684248	14190
S4R2K4	Abhd12b	Abhydrolase domain-containing 12B OS=Mus musculus OX=10090 GN=Abhd12b PE=4 SV=1	4	1	1	1	282	31.5	7.09	1.65	130.9	105.7	133	85.6	65.8	79	1.60417	0.01162	0.681824	100504285
P47968	Rpia	Ribose-5-phosphate isomerase OS=Mus musculus OX=10090 GN=Rpia PE=1 SV=2	16	4	4	4	303	32.4	8.02	5.13	123.4	123.2	122.9	75.9	83	71.5	1.60373	0.000159	0.681434	19895
D3YYD0	Olfm4	Olfactomedin-4 OS=Mus musculus OX=10090 GN=Olfm4 PE=1 SV=1	13	6	9	6	538	60.9	6.7	12.56	126.9	120.8	121.9	77.6	75.3	77.6	1.60347	2.17e-05	0.681198	380924
P62340	Tbpl1	TATA box-binding protein-like protein 1 OS=Mus musculus OX=10090 GN=Tbpl1 PE=1 SV=1	7	1	1	1	186	20.9	9.54	2	121.7	114.7	133.1	83.7	68.7	78.1	1.60304	0.00259	0.680808	237336
Q8R379	Gimap7	GTPase, IMAP family member 7 OS=Mus musculus OX=10090 GN=Gimap7 PE=1 SV=1	7	2	2	2	293	33.8	8.19	6.03	124.7	125.3	119.5	83.7	67.9	78.9	1.60304	0.000769	0.680808	231932
Q8BJL1	Fbxo30	F-box only protein 30 OS=Mus musculus OX=10090 GN=Fbxo30 PE=1 SV=2	1	1	1	1	746	82.6	5.26	1.79	121.8	123.8	123.8	75.4	74.3	81	1.60121	2.92e-05	0.679166	71865
A0A0A6YWR2	Ighg1	Ig gamma-1 chain C region secreted form (Fragment) OS=Mus musculus OX=10090 GN=Ighg1 PE=1 SV=1	32	8	99	1	393	43.4	6.44	247.95	125.3	120.5	123.5	75.8	76.9	78	1.60078	7.3e-06	0.678775	-
Q8BUM3	Ptpn7	Tyrosine-protein phosphatase non-receptor type 7 OS=Mus musculus OX=10090 GN=Ptpn7 PE=1 SV=1	5	2	2	2	359	40.3	6.7	4.89	119.6	126.6	123	80.3	75.6	74.8	1.60035	6.38e-05	0.678385	320139
O09159	Man2b1	Lysosomal alpha-mannosidase OS=Mus musculus OX=10090 GN=Man2b1 PE=1 SV=4	15	13	16	13	1013	114.6	8.13	32.58	124.8	122.1	121.9	80	73	78.1	1.59585	3.65e-05	0.674321	17159
Q60963	Pla2g7	Platelet-activating factor acetylhydrolase OS=Mus musculus OX=10090 GN=Pla2g7 PE=2 SV=2	7	3	3	3	440	49.2	7.12	3.04	116.8	127.9	124.1	71	88.6	71.5	1.59585	0.002296	0.674321	27226
A0A2R8W6G1	Rbx1	E3 ubiquitin-protein ligase RBX1 OS=Mus musculus OX=10090 GN=Rbx1 PE=1 SV=1	24	2	2	2	59	6.9	6.48	2.17	109.2	116.8	142.9	73.2	74.7	83.3	1.59559	0.012666	0.674088	56438
Q91W52	Tmem19	Transmembrane protein 19 OS=Mus musculus OX=10090 GN=Tmem19 PE=1 SV=1	6	2	2	2	336	36.3	7.72	2.73	124.5	120.7	123.6	75.7	84.2	71.4	1.59447	0.00031	0.673073	67226
Q9R257	Hebp1	Heme-binding protein 1 OS=Mus musculus OX=10090 GN=Hebp1 PE=1 SV=2	17	3	3	3	190	21.1	5.26	9.28	125.2	121.2	121.9	80.9	70.1	80.7	1.58956	0.000271	0.668623	15199
D3Z450	Serpina3i	Serine (or cysteine) peptidase inhibitor, clade A, member 3I OS=Mus musculus OX=10090 GN=Serpina3i PE=1 SV=2	13	5	8	2	408	45.7	6.95	15.15	117.8	122.6	127.9	77.2	74.2	80.3	1.58956	0.000181	0.668623	628900
A6PW28	Ripor2	Likely orthologue of H. sapiens chromosome 6 open reading frame 32 (C6orf32) OS=Mus musculus OX=10090 GN=Ripor2 PE=1 SV=1	1	1	2	1	1053	116.3	5.52	1.67	124.8	128.7	114.8	79.6	86.4	65.8	1.58887	0.003442	0.668001	193385
Q06180	Ptpn2	Tyrosine-protein phosphatase non-receptor type 2 OS=Mus musculus OX=10090 GN=Ptpn2 PE=1 SV=2	3	2	2	2	406	47.3	8.37	5.04	125.5	117.4	125.4	77.6	74	80.2	1.58887	0.000147	0.668001	19255
P01798		Ig heavy chain V-III region E109 OS=Mus musculus OX=10090 PE=1 SV=1	22	2	4	1	113	12.6	7.39	9.8	124.7	115.7	127.7	76.4	74	81.5	1.58732	0.000427	0.666595	#N/A
Q8R0X7	Sgpl1	Sphingosine-1-phosphate lyase 1 OS=Mus musculus OX=10090 GN=Sgpl1 PE=1 SV=1	16	9	12	9	568	63.6	9.1	22.52	118.1	120.7	129.1	75.4	75.8	80.9	1.58509	0.000273	0.664567	20397
P01654		Ig kappa chain V-III region PC 2880/PC 1229 OS=Mus musculus OX=10090 PE=1 SV=1	49	3	5	2	111	12	5.34	16.86	125.5	122.1	120.3	77.5	78.7	75.9	1.58509	1.26e-05	0.664567	#N/A
P48999	Alox5	Arachidonate 5-lipoxygenase OS=Mus musculus OX=10090 GN=Alox5 PE=1 SV=3	10	6	7	6	674	77.9	6.18	11.27	121.2	121.7	124.8	76.2	78.9	77.1	1.58355	5.16e-06	0.663162	11689
P06797	Ctsl	Cathepsin L1 OS=Mus musculus OX=10090 GN=Ctsl PE=1 SV=2	20	5	5	5	334	37.5	6.83	6.82	121.5	119.6	126.6	79.1	79.5	73.7	1.58287	8.72e-05	0.66254	13039
P62962	Pfn1	Profilin-1 OS=Mus musculus OX=10090 GN=Pfn1 PE=1 SV=2	64	10	47	10	140	14.9	8.28	96.69	124.2	120.6	122.8	77.1	76.6	78.7	1.58176	3.25e-06	0.661527	18643
P01902	H2-K1	H-2 class I histocompatibility antigen, K-D alpha chain OS=Mus musculus OX=10090 GN=H2-K1 PE=1 SV=1	41	12	25	7	368	41.5	6.62	48.98	122.5	121.9	123.2	73.4	82.5	76.5	1.58176	7.52e-05	0.661527	14972
A0A140T8N3	Igkv13-84	Immunoglobulin kappa chain variable 13-84 (Fragment) OS=Mus musculus OX=10090 GN=Igkv13-84 PE=4 SV=2	28	3	7	3	115	12.6	6.51	13.71	127.2	120.8	119.4	76.1	76.9	79.6	1.57954	6.82e-05	0.659501	-
P70698	Ctps1	CTP synthase 1 OS=Mus musculus OX=10090 GN=Ctps1 PE=1 SV=2	20	12	16	11	591	66.6	6.58	28.07	122.7	119.7	124.9	76.2	74	82.6	1.57775	0.000115	0.657868	-
P01646		Ig kappa chain V-V region HP 123E6 OS=Mus musculus OX=10090 PE=1 SV=1	43	3	4	2	108	12	7.97	4.1	124.1	117.1	126	81	69.5	82.3	1.57732	0.000785	0.657475	#N/A
P36371	Tap2	Antigen peptide transporter 2 OS=Mus musculus OX=10090 GN=Tap2 PE=1 SV=1	11	8	9	8	702	77.4	7.24	19.21	119	125.5	122.6	76.8	79.6	76.5	1.57621	3e-05	0.656463	21355
P01791		Ig heavy chain V region HPCM6 OS=Mus musculus OX=10090 PE=1 SV=1	28	3	6	2	123	13.9	6.06	8.82	121.5	126.6	118.9	84.1	83.5	65.4	1.57511	0.002403	0.65545	#N/A
Q6A0D4	Rftn1	Raftlin OS=Mus musculus OX=10090 GN=Rftn1 PE=1 SV=4	7	4	4	4	554	61.5	7.68	5.36	125.3	125.9	115.6	69.1	83.6	80.6	1.57222	0.001302	0.652808	76438
Q61830	Mrc1	Macrophage mannose receptor 1 OS=Mus musculus OX=10090 GN=Mrc1 PE=1 SV=2	14	19	23	19	1456	164.9	6.83	39.25	121.5	122.8	122.3	75.6	78	79.7	1.57137	3.72e-06	0.65202	17533
P00493	Hprt1	Hypoxanthine-guanine phosphoribosyltransferase OS=Mus musculus OX=10090 GN=Hprt1 PE=1 SV=3	40	7	18	7	218	24.6	6.68	23.21	120.5	122.1	124.1	75.9	81.5	76	1.57112	3.08e-05	0.651796	-
A0A0U1RPY6	Arl6ip1	ADP-ribosylation factor-like protein 6-interacting protein 1 (Fragment) OS=Mus musculus OX=10090 GN=Arl6ip1 PE=1 SV=1	9	1	2	1	111	12.9	8.84	3.87	131.3	113.8	121.5	79.2	76.6	77.6	1.57069	0.000973	0.651402	54208
O88958	Gnpda1	Glucosamine-6-phosphate isomerase 1 OS=Mus musculus OX=10090 GN=Gnpda1 PE=1 SV=3	31	7	10	5	289	32.5	6.6	9.73	113.8	122.1	130.7	82.3	68.4	82.7	1.57069	0.002804	0.651402	26384
Q5SVP0	9930111J21Rik1	RIKEN cDNA 9930111J21 gene 1 OS=Mus musculus OX=10090 GN=9930111J21Rik1 PE=1 SV=1	4	4	5	2	844	95.5	6.32	8.72	119.6	115.5	131.4	79.9	66.9	86.7	1.56959	0.004128	0.650391	667214
P57746	Atp6v1d	V-type proton ATPase subunit D OS=Mus musculus OX=10090 GN=Atp6v1d PE=1 SV=1	18	4	7	4	247	28.4	9.45	13.64	122.3	124.1	120.1	73.8	79.9	79.9	1.56892	4.58e-05	0.649773	73834
Q05144	Rac2	Ras-related C3 botulinum toxin substrate 2 OS=Mus musculus OX=10090 GN=Rac2 PE=1 SV=1	41	9	24	4	192	21.4	7.61	46.73	118.4	124.9	123	81.7	72.7	79.2	1.56807	0.00018	0.648985	19354
Q9D1K2	Atp6v1f	V-type proton ATPase subunit F OS=Mus musculus OX=10090 GN=Atp6v1f PE=1 SV=2	40	6	10	6	119	13.4	5.82	20.01	93.4	121.3	151.7	69.1	72.9	91.7	1.56782	0.072231	0.648762	66144
Q99MU3	Adar	Double-stranded RNA-specific adenosine deaminase OS=Mus musculus OX=10090 GN=Adar PE=1 SV=2	4	5	5	5	1178	130.4	8.7	1.89	119.4	124.7	122.1	78.7	80.6	74.4	1.56697	5.03e-05	0.647974	56417
Q8C3J5	Dock2	Dedicator of cytokinesis protein 2 OS=Mus musculus OX=10090 GN=Dock2 PE=1 SV=3	16	27	35	26	1828	211.6	6.99	51.14	122.8	120.8	122.5	76.9	76.5	80.4	1.56587	5.82e-06	0.646963	94176
Q61205	Pafah1b3	Platelet-activating factor acetylhydrolase IB subunit gamma OS=Mus musculus OX=10090 GN=Pafah1b3 PE=1 SV=1	14	4	4	4	232	25.8	6.93	5.49	114.9	122.7	128.3	71.9	76.7	85.5	1.56301	0.001391	0.644324	18476
Q9D1Q6	Erp44	Endoplasmic reticulum resident protein 44 OS=Mus musculus OX=10090 GN=Erp44 PE=1 SV=1	27	10	26	10	406	46.8	5.27	51.74	123.5	123.1	119.3	77.8	76.8	79.5	1.56301	9.29e-06	0.644324	76299
Q9D8V7	Sec11c	Signal peptidase complex catalytic subunit SEC11C OS=Mus musculus OX=10090 GN=Sec11c PE=1 SV=3	30	6	10	6	192	21.6	9.23	21.91	119.3	122.4	124.1	77.4	79.7	77.1	1.56191	1.13e-05	0.643314	66286
Q4PJX1	Odr4	Protein odr-4 homolog OS=Mus musculus OX=10090 GN=Odr4 PE=1 SV=2	13	6	6	6	447	50	6.14	10.28	126	114.1	125.5	69.5	81.4	83.5	1.55973	0.0017	0.641294	226499
Q8VEB4	Pla2g15	Group XV phospholipase A2 OS=Mus musculus OX=10090 GN=Pla2g15 PE=1 SV=1	10	4	5	4	412	47.3	6.47	13.62	118.6	124.7	122.2	72.5	83.3	78.7	1.55863	0.000264	0.640283	192654
Q00612	G6pdx	Glucose-6-phosphate 1-dehydrogenase X OS=Mus musculus OX=10090 GN=G6pdx PE=1 SV=3	43	23	38	23	515	59.2	6.49	78.88	123.8	120.2	121.4	77.5	78.7	78.4	1.55754	2.58e-06	0.639274	14381
A0A0R4J0P5	Pstpip1	Proline-serine-threonine phosphatase-interacting protein 1 OS=Mus musculus OX=10090 GN=Pstpip1 PE=1 SV=1	12	5	5	5	415	47.5	5.53	5.34	115	124.9	125.5	77.9	78.8	77.9	1.55754	0.000218	0.639274	19200
P00375	Dhfr	Dihydrofolate reductase OS=Mus musculus OX=10090 GN=Dhfr PE=1 SV=3	18	4	6	4	187	21.6	8.53	9.9	125.6	121.2	118.5	78	78.1	78.5	1.55712	3.04e-05	0.638878	13361
P50516	Atp6v1a	V-type proton ATPase catalytic subunit A OS=Mus musculus OX=10090 GN=Atp6v1a PE=1 SV=2	20	13	23	13	617	68.3	5.58	56.25	123	120.6	121.7	78.4	77.7	78.6	1.55645	5.15e-07	0.638264	11964
Q9D211	Cdkn2aipnl	CDKN2AIP N-terminal-like protein OS=Mus musculus OX=10090 GN=Cdkn2aipnl PE=3 SV=1	15	2	3	2	116	13.2	5.29	5.09	117.7	123	124.5	78.1	79.8	76.9	1.55537	4.07e-05	0.637254	52626
Q8CAK3	Ryden	Repressor of yield of DENV protein homolog OS=Mus musculus OX=10090 GN=Ryden PE=2 SV=1	4	1	1	1	290	33	7.28	2.15	122.5	118.6	124	77.9	81.2	75.7	1.55494	4.38e-05	0.636859	-
A0A1B0GSX0	Ldha	L-lactate dehydrogenase OS=Mus musculus OX=10090 GN=Ldha PE=1 SV=1	37	13	38	12	361	39.7	8.35	79.42	124.7	119.6	120.9	77.3	78.2	79.4	1.5547	1.23e-05	0.63664	16828
P51863	Atp6v0d1	V-type proton ATPase subunit d 1 OS=Mus musculus OX=10090 GN=Atp6v0d1 PE=1 SV=2	15	6	10	6	351	40.3	5	15.79	125.2	116.8	123.1	71.1	85.9	78	1.55362	0.000947	0.635631	11972
Q8BSF4	Pisd	Phosphatidylserine decarboxylase proenzyme, mitochondrial OS=Mus musculus OX=10090 GN=Pisd PE=2 SV=1	5	2	2	2	406	45.9	9.57	2.09	112.3	121.6	131.1	88.8	80.5	65.7	1.55319	0.007488	0.635235	320951
P04228	H2-Aa	H-2 class II histocompatibility antigen, A-D alpha chain OS=Mus musculus OX=10090 GN=H2-Aa PE=1 SV=1	14	3	5	3	256	28.2	5	16.09	121.8	120.5	122.7	76.4	79.3	79.4	1.55253	3.21e-06	0.634622	14960
Q8BMC4	Nop9	Nucleolar protein 9 OS=Mus musculus OX=10090 GN=Nop9 PE=1 SV=1	4	3	3	3	636	70	7.27	2.02	116.9	123	125	70.2	83.4	81.5	1.55211	0.00083	0.634226	67842
P59108	Cpne2	Copine-2 OS=Mus musculus OX=10090 GN=Cpne2 PE=1 SV=1	11	5	8	4	548	61	5.96	13.75	125.9	113.9	125	72.8	76.9	85.5	1.55102	0.001301	0.633217	234577
Q9QZK7	Dok3	Docking protein 3 OS=Mus musculus OX=10090 GN=Dok3 PE=1 SV=1	13	4	4	4	444	48	7.02	4.8	119	123.9	121.9	84.7	68.6	81.9	1.55102	0.001118	0.633217	27261
Q9DBH5	Lman2	Vesicular integral-membrane protein VIP36 OS=Mus musculus OX=10090 GN=Lman2 PE=1 SV=2	27	9	19	9	358	40.4	6.95	24.93	122.4	123.6	118.7	78.8	77.5	79	1.54994	9.86e-06	0.632209	66890
A2AQC8	Nfatc2	Nuclear factor of activated T-cells c2 isoform IA-IIL-VIIa OS=Mus musculus OX=10090 GN=Nfatc2 PE=1 SV=1	3	2	2	2	653	69.9	8.44	2.29	107.9	134.6	122.1	79.4	78	78	1.54885	0.005078	0.6312	18019
P99026	Psmb4	Proteasome subunit beta type-4 OS=Mus musculus OX=10090 GN=Psmb4 PE=1 SV=1	21	4	6	4	264	29.1	5.64	10.51	124.3	123.3	116.8	79.3	70.7	85.6	1.54669	0.000948	0.629183	19172
A0A0R4IZZ6	Fnbp4	Formin-binding protein 4 OS=Mus musculus OX=10090 GN=Fnbp4 PE=1 SV=1	2	2	2	2	1077	116.2	4.83	2.92	111.7	129.8	122.9	76.4	79.2	80	1.54669	0.001342	0.629183	55935
A0A0A0MQF6	Gapdh	Glyceraldehyde-3-phosphate dehydrogenase OS=Mus musculus OX=10090 GN=Gapdh PE=1 SV=1	52	17	82	3	359	38.6	8.97	163.66	120.8	122.9	120.7	78.8	77.6	79.3	1.54603	1.04e-06	0.628571	14433
P97371	Psme1	Proteasome activator complex subunit 1 OS=Mus musculus OX=10090 GN=Psme1 PE=1 SV=2	62	16	37	16	249	28.7	5.97	72.65	126.1	118.3	120	78.8	78.7	78.2	1.54603	5.53e-05	0.628571	19186
P52480	Pkm	Pyruvate kinase PKM OS=Mus musculus OX=10090 GN=Pkm PE=1 SV=4	64	33	93	31	531	57.8	7.47	170.16	121.9	121.1	121.3	77	82	76.7	1.54561	1.59e-05	0.628175	18746
Q3TYS2	Cybc1	Cytochrome b-245 chaperone 1 OS=Mus musculus OX=10090 GN=Cybc1 PE=1 SV=2	10	2	4	2	187	20.9	8.59	6.98	123.2	118.4	122.6	78.5	80.5	76.9	1.54388	2.01e-05	0.626556	217370
Q9Z0H7	Bcl10	B-cell lymphoma/leukemia 10 OS=Mus musculus OX=10090 GN=Bcl10 PE=1 SV=1	15	4	4	4	233	25.9	6.55	6.53	126.3	119.4	118.5	78.6	78.2	79.1	1.54388	6.61e-05	0.626556	12042
D6RFB8	Pold1	DNA polymerase OS=Mus musculus OX=10090 GN=Pold1 PE=1 SV=1	2	2	3	2	981	108.8	7.25	3.3	118.2	122.5	123.4	78.7	75.1	82.1	1.54345	7.79e-05	0.62616	18971
P97449	Anpep	Aminopeptidase N OS=Mus musculus OX=10090 GN=Anpep PE=1 SV=4	16	16	24	16	966	109.6	5.9	38.18	121.2	119.3	123.1	78.4	77.8	80.2	1.53807	5.48e-06	0.621122	16790
Q60766	Irgm1	Immunity-related GTPase family M protein 1 OS=Mus musculus OX=10090 GN=Irgm1 PE=1 SV=1	17	7	12	7	409	46.5	8.28	29.92	123.6	120.7	119.2	75.6	79.7	81.2	1.537	3.67e-05	0.620115	15944
P49717	Mcm4	DNA replication licensing factor MCM4 OS=Mus musculus OX=10090 GN=Mcm4 PE=1 SV=1	7	5	6	5	862	96.7	7.2	6.21	118.9	126.2	118.4	71.6	90.1	74.8	1.537	0.002465	0.620115	17217
Q6ZWM4	Lsm8	U6 snRNA-associated Sm-like protein LSm8 OS=Mus musculus OX=10090 GN=Lsm8 PE=1 SV=3	10	1	1	1	96	10.4	4.48	3.53	122.3	116.6	124.5	79.8	73.2	83.6	1.53593	0.000389	0.619109	76522
Q91ZN5	Slc35b2	Adenosine 3'-phospho 5'-phosphosulfate transporter 1 OS=Mus musculus OX=10090 GN=Slc35b2 PE=1 SV=1	5	2	3	2	431	47.3	9.29	2.32	108.8	139.7	114.9	81.7	84.2	70.8	1.53528	0.014876	0.618499	73836
A0A1Y7VJA2	Evl	Ena/VASP-like protein (Fragment) OS=Mus musculus OX=10090 GN=Evl PE=1 SV=1	14	5	7	5	426	46	9.22	12.45	120.4	114.8	128	79.5	76.8	80.5	1.53378	0.000451	0.617095	14026
E9PX59	Samd9l	Sterile alpha motif domain-containing protein 9-like OS=Mus musculus OX=10090 GN=Samd9l PE=1 SV=1	5	7	8	7	1579	182.1	7.03	12.06	123.6	119.1	120.4	77.8	84.1	75	1.53271	0.000151	0.616089	209086
Q8BVK9	Sp110	Sp110 nuclear body protein OS=Mus musculus OX=10090 GN=Sp110 PE=1 SV=1	13	6	6	6	445	50.1	9.86	6.95	120.4	119.1	123.5	75.4	81.3	80.3	1.53165	4.78e-05	0.615083	109032
P13379	Cd5	T-cell surface glycoprotein CD5 OS=Mus musculus OX=10090 GN=Cd5 PE=1 SV=1	8	3	3	3	494	53.8	8.21	4.12	116.1	130.6	116.2	73.4	77.1	86.5	1.53122	0.002481	0.614685	12507
E9Q2A6	Ptk2b	Protein-tyrosine kinase 2-beta OS=Mus musculus OX=10090 GN=Ptk2b PE=1 SV=1	6	6	6	6	967	111	6.04	9.15	117.8	120.5	124.6	79.3	79.5	78.3	1.53058	3.13e-05	0.614077	19229
Q3TBV5	Il1rn	Interleukin-1 OS=Mus musculus OX=10090 GN=Il1rn PE=1 SV=1	14	2	2	2	162	18.3	6.01	5.97	114.6	130.2	118.1	76.4	74.7	86	1.53058	0.002059	0.614077	16181
Q09200	B4galnt1	Beta-1,4 N-acetylgalactosaminyltransferase 1 OS=Mus musculus OX=10090 GN=B4galnt1 PE=1 SV=1	14	7	7	7	533	59.2	8.59	10.52	125.9	119.2	117.7	77.9	79.3	80	1.52951	8.64e-05	0.61307	14421
O89110	Casp8	Caspase-8 OS=Mus musculus OX=10090 GN=Casp8 PE=1 SV=1	18	8	10	8	480	55.3	5.25	19.21	120	124.1	118.6	80.1	79.4	77.9	1.5278	1.93e-05	0.611457	12370
Q9CZE3	Rab32	Ras-related protein Rab-32 OS=Mus musculus OX=10090 GN=Rab32 PE=1 SV=3	22	5	7	3	223	25.1	6.68	20.55	121.9	121	119.6	76.9	80.4	80.2	1.52632	5.96e-06	0.610054	67844
Z4YJJ5	Cyld	Ubiquitin carboxyl-terminal hydrolase CYLD OS=Mus musculus OX=10090 GN=Cyld PE=1 SV=1	4	3	3	3	955	106.8	5.63	3.36	120.4	126.6	115.2	72.4	84.4	81	1.52313	0.001035	0.607038	74256
A0A140T8P7	Igkv8-21	Immunoglobulin kappa variable 8-21 (Fragment) OS=Mus musculus OX=10090 GN=Igkv8-21 PE=1 SV=2	21	3	3	2	120	13.1	8.28	5.39	129.2	113.2	119.5	81.5	74.8	81.8	1.51995	0.001349	0.604024	-
Q9CVB6	Arpc2	Actin-related protein 2/3 complex subunit 2 OS=Mus musculus OX=10090 GN=Arpc2 PE=1 SV=3	38	14	25	14	300	34.3	7.36	53.14	120.7	119.3	121.8	76	83.3	78.8	1.51953	5.18e-05	0.603625	76709
Q8BK30	Ndufv3	NADH dehydrogenase [ubiquinone] flavoprotein 3, mitochondrial OS=Mus musculus OX=10090 GN=Ndufv3 PE=1 SV=1	25	3	3	1	104	11.8	9.35	1.93	122.9	134.7	104.3	82.2	81.6	74.4	1.51931	0.01096	0.603418	78330
Q69ZK0	Prex1	Phosphatidylinositol 3,4,5-trisphosphate-dependent Rac exchanger 1 protein OS=Mus musculus OX=10090 GN=Prex1 PE=1 SV=2	3	5	5	5	1650	184.8	6.29	2.5	122.2	119.2	120.4	77.4	78.5	82.3	1.51889	1.81e-05	0.603019	277360
Q9CQE5	Rgs10	Regulator of G-protein signaling 10 OS=Mus musculus OX=10090 GN=Rgs10 PE=1 SV=1	18	3	3	3	181	21.1	6.81	9.01	119.1	119.2	123.4	70.7	92.4	75.1	1.51847	0.003702	0.60262	67865
P29452	Casp1	Caspase-1 OS=Mus musculus OX=10090 GN=Casp1 PE=1 SV=1	7	3	3	3	402	45.6	6.04	4.62	110.7	118.5	132.6	82.8	73.4	82.1	1.51825	0.004368	0.602413	12362
P70677	Casp3	Caspase-3 OS=Mus musculus OX=10090 GN=Casp3 PE=1 SV=1	21	4	4	4	277	31.5	6.92	8.89	116.5	121.4	123.7	69.7	96.4	72.3	1.51678	0.009396	0.601011	12367
Q9CXE7	Tmed5	Transmembrane emp24 domain-containing protein 5 OS=Mus musculus OX=10090 GN=Tmed5 PE=1 SV=1	13	3	4	3	229	26.2	4.93	6.89	123.9	118	119.7	77.8	74.6	86.2	1.51551	0.000453	0.599801	73130
Q91YX0	Themis2	Protein THEMIS2 OS=Mus musculus OX=10090 GN=Themis2 PE=1 SV=2	6	3	3	3	663	74.3	6.19	5.06	119.2	120.1	121.9	90.2	59.8	88.8	1.51256	0.014797	0.596995	230787
A0A0G2JE99	Iglc1	Immunoglobulin lambda constant 1 (Fragment) OS=Mus musculus OX=10090 GN=Iglc1 PE=4 SV=1	45	3	16	3	106	11.7	6.27	34.37	120.5	119	121.6	79.3	82.7	76.8	1.51214	2.61e-05	0.596596	-
Q9EST5	Anp32b	Acidic leucine-rich nuclear phosphoprotein 32 family member B OS=Mus musculus OX=10090 GN=Anp32b PE=1 SV=1	27	6	10	3	272	31.1	4.01	22.4	117.8	120.9	122.2	83.8	72.1	83.2	1.50941	0.000542	0.593985	67628
P50518	Atp6v1e1	V-type proton ATPase subunit E 1 OS=Mus musculus OX=10090 GN=Atp6v1e1 PE=1 SV=2	28	6	10	6	226	26.1	8.43	15.61	120.6	118.5	121.7	76.3	81.7	81.1	1.50899	3.15e-05	0.593585	11973
P30993	C5ar1	C5a anaphylatoxin chemotactic receptor 1 OS=Mus musculus OX=10090 GN=C5ar1 PE=1 SV=2	6	2	2	2	351	39	8.79	4.43	115.3	120.9	124.6	80.3	75.6	83.4	1.50773	0.000329	0.592379	12273
Q07797	Lgals3bp	Galectin-3-binding protein OS=Mus musculus OX=10090 GN=Lgals3bp PE=1 SV=1	15	6	11	6	577	64.5	5.14	15.72	119.2	121.9	119.6	81.1	80.3	77.9	1.50731	5.92e-06	0.591979	19039
Q2EMV9	Parp14	Poly [ADP-ribose] polymerase 14 OS=Mus musculus OX=10090 GN=Parp14 PE=1 SV=3	6	10	11	10	1817	203.7	6.79	5.96	118.3	123	119.4	79.8	77.8	81.7	1.50731	2.38e-05	0.591979	547253
Q8R550	Sh3kbp1	SH3 domain-containing kinase-binding protein 1 OS=Mus musculus OX=10090 GN=Sh3kbp1 PE=1 SV=1	10	7	8	7	709	78.1	7.55	11.41	119.1	122.1	119.5	78.9	79.6	80.8	1.50731	3.16e-06	0.591979	58194
Q6NWW9	Fndc3b	Fibronectin type III domain-containing protein 3B OS=Mus musculus OX=10090 GN=Fndc3b PE=1 SV=1	2	2	2	2	1207	132.7	6.29	2.15	119.9	118.3	122.3	78.5	83.6	77.2	1.50648	5.89e-05	0.591179	72007
Q91WC9	Daglb	Sn1-specific diacylglycerol lipase beta OS=Mus musculus OX=10090 GN=Daglb PE=1 SV=2	3	2	2	2	669	73.9	6.73	3.06	112.8	126.5	121.2	79.6	82.8	77.1	1.50522	0.00073	0.589973	231871
P18760	Cfl1	Cofilin-1 OS=Mus musculus OX=10090 GN=Cfl1 PE=1 SV=3	66	17	45	15	166	18.5	8.09	87.71	123.9	117.9	118.5	80.9	79	79.8	1.50313	3.52e-05	0.587969	12631
P49935	Ctsh	Pro-cathepsin H OS=Mus musculus OX=10090 GN=Ctsh PE=1 SV=2	18	5	7	5	333	37.1	8.4	9.42	112	117.6	130.7	80.6	76.4	82.7	1.50313	0.002338	0.587969	13036
B1ATI9	Gas7	Growth arrest-specific protein 7 OS=Mus musculus OX=10090 GN=Gas7 PE=1 SV=1	5	2	2	2	412	47.2	7.59	2	110.9	110.6	138.7	86.4	89.4	63.9	1.50271	0.031002	0.587569	14457
P27773	Pdia3	Protein disulfide-isomerase A3 OS=Mus musculus OX=10090 GN=Pdia3 PE=1 SV=2	55	33	90	33	505	56.6	6.21	160.89	122.4	118.4	119.5	79.1	80.8	79.9	1.5025	6.34e-06	0.587367	14827
A2AB60	Fmnl1	Formin-like 1, isoform CRA_c OS=Mus musculus OX=10090 GN=Fmnl1 PE=1 SV=1	15	15	18	13	1090	121.5	5.71	31.16	116.4	121.1	122.7	79.4	80	80.4	1.50208	3.05e-05	0.586966	57778
Q8BYK6	Ythdf3	YTH domain-containing family protein 3 OS=Mus musculus OX=10090 GN=Ythdf3 PE=1 SV=2	6	4	4	1	585	63.9	9.04	5.45	128.1	115.4	116.7	73.4	91.6	74.8	1.50208	0.004836	0.586966	229096
Q8CG29	Myo1f	Myosin IF OS=Mus musculus OX=10090 GN=Myo1f PE=1 SV=1	14	13	15	11	1098	125.1	9.17	30.7	117.3	119.3	123.3	79.1	78.2	82.7	1.49958	5.76e-05	0.584561	17916
Q62241	Snrpc	U1 small nuclear ribonucleoprotein C OS=Mus musculus OX=10090 GN=Snrpc PE=1 SV=1	6	1	1	1	159	17.4	9.67	2.66	119.8	112.6	127.5	83.2	79.5	77.3	1.49958	0.000993	0.584561	20630
P62313	Lsm6	U6 snRNA-associated Sm-like protein LSm6 OS=Mus musculus OX=10090 GN=Lsm6 PE=1 SV=1	10	1	1	1	80	9.1	9.58	2.39	116.7	120.7	122.6	83	74	83.1	1.49937	0.000329	0.584361	78651
E9Q722	Usf1	Upstream stimulatory factor 1 OS=Mus musculus OX=10090 GN=Usf1 PE=1 SV=1	4	1	1	1	296	32	5.5	1.61	121.4	114.5	124	78.9	83	78.2	1.49896	0.000239	0.583961	22278
P01921	H2-Ab1	H-2 class II histocompatibility antigen, A-D beta chain OS=Mus musculus OX=10090 GN=H2-Ab1 PE=1 SV=1	23	6	11	6	265	29.9	7.83	28.7	120.3	118.7	120.9	77.3	84.5	78.4	1.49833	6.86e-05	0.58336	14961
H3BIX7	Atp2c1	Calcium-transporting ATPase OS=Mus musculus OX=10090 GN=Atp2c1 PE=1 SV=1	4	3	3	3	926	101.2	7.44	6.21	125.1	114	120.5	79.6	80.5	80.3	1.49584	0.000251	0.580956	235574
P61161	Actr2	Actin-related protein 2 OS=Mus musculus OX=10090 GN=Actr2 PE=1 SV=1	24	9	24	9	394	44.7	6.74	50.57	121.8	118.7	118.9	76.5	85	79	1.49439	0.000128	0.579554	66713
Q9D906	Atg7	Ubiquitin-like modifier-activating enzyme ATG7 OS=Mus musculus OX=10090 GN=Atg7 PE=1 SV=1	9	7	10	7	698	77.5	6.4	16.25	117.5	121.7	120.1	79.2	81.8	79.7	1.49273	1.11e-05	0.577953	74244
Q9WTS2	Fut8	Alpha-(1,6)-fucosyltransferase OS=Mus musculus OX=10090 GN=Fut8 PE=1 SV=2	6	4	5	4	575	66.5	7.52	6.89	123	120.9	115.3	78.5	88	74.2	1.49231	0.001079	0.577551	53618
Q8VEH8	Erlec1	Endoplasmic reticulum lectin 1 OS=Mus musculus OX=10090 GN=Erlec1 PE=1 SV=1	24	9	10	9	483	54.9	6.25	13.29	115.6	124	119.7	80.1	80.5	80.2	1.49211	8.36e-05	0.577354	66753
Q9D659	Vsir	V-type immunoglobulin domain-containing suppressor of T-cell activation OS=Mus musculus OX=10090 GN=Vsir PE=1 SV=2	5	2	3	2	308	33.5	7.53	6.62	119.3	116.4	123.4	78	82.4	80.6	1.49004	8.07e-05	0.575352	74048
Q9QUJ7	Acsl4	Long-chain-fatty-acid--CoA ligase 4 OS=Mus musculus OX=10090 GN=Acsl4 PE=1 SV=2	13	9	12	9	711	79	8.28	24.06	120.5	118.3	120.2	82	78.1	80.9	1.48963	8.26e-06	0.574951	50790
A0A075B5Y1	Ighv1-74	Immunoglobulin heavy variable V1-74 OS=Mus musculus OX=10090 GN=Ighv1-74 PE=4 SV=1	16	2	5	1	116	12.9	8.88	10.44	121.8	116	121.2	81.8	74.3	84.9	1.48963	0.000419	0.574951	-
D3Z136	Elovl5	Elongation of very long chain fatty acids protein (Fragment) OS=Mus musculus OX=10090 GN=Elovl5 PE=1 SV=1	4	1	1	1	180	21.5	8.87	2	123.7	116.4	118.7	80.5	82.4	78.2	1.48818	9.23e-05	0.573548	68801
Q9CQ40	Mrpl49	39S ribosomal protein L49, mitochondrial OS=Mus musculus OX=10090 GN=Mrpl49 PE=1 SV=1	4	1	1	1	166	19.1	9.5	2.02	124.8	118.1	115.9	79	87.6	74.5	1.48818	0.00111	0.573548	18120
E9Q7A7	Ccnt1	Cyclin-T1 OS=Mus musculus OX=10090 GN=Ccnt1 PE=1 SV=1	12	2	2	2	184	21.4	8.05	2.06	123.9	114.5	120.5	83.3	75.7	82.2	1.48798	0.000416	0.573352	12455
Q99104	Myo5a	Unconventional myosin-Va OS=Mus musculus OX=10090 GN=Myo5a PE=1 SV=2	5	10	10	6	1853	215.4	8.63	22.92	116	124	118.7	79.4	82.4	79.5	1.48653	0.000105	0.57195	17918
Q80U44	Zfyve16	Zinc finger FYVE domain-containing protein 16 OS=Mus musculus OX=10090 GN=Zfyve16 PE=1 SV=2	1	1	1	1	1528	166.6	4.78	2.14	99.1	119.6	139.8	96.9	64.2	80.4	1.48447	0.060835	0.56995	218441
Q9WTR1	Trpv2	Transient receptor potential cation channel subfamily V member 2 OS=Mus musculus OX=10090 GN=Trpv2 PE=1 SV=2	6	4	5	4	756	85.9	6.99	1.98	120.7	122.7	115	81.5	83.4	76.6	1.48406	0.000222	0.569547	22368
O08528	Hk2	Hexokinase-2 OS=Mus musculus OX=10090 GN=Hk2 PE=1 SV=1	18	16	20	14	917	102.5	6.11	43.62	116.3	120.9	121.1	78.9	84.2	78.5	1.48303	8.69e-05	0.568548	15277
Q921W0	Chmp1a	Charged multivesicular body protein 1a OS=Mus musculus OX=10090 GN=Chmp1a PE=1 SV=1	12	3	3	3	196	21.6	8.06	8.3	122.7	115.8	119.8	81	80.4	80.3	1.48242	4.23e-05	0.56795	234852
Q8R0B4	Tardbp	MCG16669, isoform CRA_a OS=Mus musculus OX=10090 GN=Tardbp PE=1 SV=1	22	6	10	6	295	33.3	7.06	8.14	122.4	119	116.8	83.7	77.3	80.7	1.482	9.47e-05	0.567547	230908
Q9CY64	Blvra	Biliverdin reductase A OS=Mus musculus OX=10090 GN=Blvra PE=1 SV=1	24	7	10	7	295	33.5	7.02	26.04	120.8	116.2	121.2	81.9	77.6	82.3	1.48139	6.06e-05	0.566952	109778
Q9R0Q9	Mpdu1	Mannose-P-dolichol utilization defect 1 protein OS=Mus musculus OX=10090 GN=Mpdu1 PE=1 SV=1	4	1	2	1	247	26.5	8.75	4.09	171.4	96.3	90.5	61.7	101.1	79	1.48139	0.244191	0.566952	24070
A2AAY5	Sh3pxd2b	SH3 and PX domain-containing protein 2B OS=Mus musculus OX=10090 GN=Sh3pxd2b PE=1 SV=1	2	2	2	2	908	101.5	8.66	4.13	118.5	116.6	123.1	74.4	86.4	81	1.48139	0.000614	0.566952	268396
Q9Z0E6	Gbp2	Guanylate-binding protein 2 OS=Mus musculus OX=10090 GN=Gbp2 PE=1 SV=1	19	10	17	7	589	66.7	5.71	29.36	119.5	119.3	119.4	76.6	78.7	86.6	1.48078	0.000219	0.566354	14469
Q4VC33	Maea	Macrophage erythroblast attacher OS=Mus musculus OX=10090 GN=Maea PE=1 SV=1	9	3	3	3	396	45.3	8.69	5.46	130.9	105.6	121.6	66.3	102.9	72.7	1.48036	0.045401	0.565952	59003
P17809	Slc2a1	Solute carrier family 2, facilitated glucose transporter member 1 OS=Mus musculus OX=10090 GN=Slc2a1 PE=1 SV=4	2	1	1	1	492	53.9	8.87	1.88	136.7	112.1	109.3	75.3	84.4	82.2	1.48036	0.013217	0.565952	20525
E0CYT6	Sdc1	Syndecan-1 (Fragment) OS=Mus musculus OX=10090 GN=Sdc1 PE=1 SV=1	5	1	1	1	206	21.7	4.77	2.48	116.6	127.4	114.1	81	74.3	86.6	1.48036	0.002018	0.565952	20969
Q9Z2L7	Crlf3	Cytokine receptor-like factor 3 OS=Mus musculus OX=10090 GN=Crlf3 PE=1 SV=1	14	7	8	7	442	49.5	5.03	20.15	119.9	119.5	118.7	74.5	87.7	79.8	1.47975	0.000552	0.565355	54394
Q8R242	Ctbs	Di-N-acetylchitobiase OS=Mus musculus OX=10090 GN=Ctbs PE=1 SV=2	12	4	4	4	366	41.3	5.6	1.63	122.7	114	121.4	80	79.2	82.8	1.47975	0.000188	0.565355	74245
P98197	Atp11a	Probable phospholipid-transporting ATPase IH OS=Mus musculus OX=10090 GN=Atp11a PE=1 SV=1	8	9	9	7	1187	135.4	6.48	21.65	118.2	118.7	121.1	79.1	77.8	85.1	1.47934	8.97e-05	0.564953	50770
Q8VE37	Rcc1	Regulator of chromosome condensation OS=Mus musculus OX=10090 GN=Rcc1 PE=1 SV=1	14	4	5	4	421	44.9	8.1	7.96	121.8	118	118.2	79.9	78.5	83.6	1.47934	3.89e-05	0.564953	100088
P53986	Slc16a1	Monocarboxylate transporter 1 OS=Mus musculus OX=10090 GN=Slc16a1 PE=1 SV=1	7	4	5	4	493	53.2	7.47	5.07	123.1	117.7	117	79.2	76.6	86.2	1.47851	0.000365	0.564146	20501
P61924	Copz1	Coatomer subunit zeta-1 OS=Mus musculus OX=10090 GN=Copz1 PE=1 SV=1	6	1	2	1	177	20.2	4.81	2.59	114.9	126.8	116.1	72.1	93.2	77	1.47668	0.006546	0.562359	56447
P26151	Fcgr1	High affinity immunoglobulin gamma Fc receptor I OS=Mus musculus OX=10090 GN=Fcgr1 PE=1 SV=1	2	1	1	1	404	44.9	6.09	1.79	115.6	117.4	124.6	71.1	85.4	85.9	1.47525	0.002332	0.560958	14129
Q91YP3	Dera	Deoxyribose-phosphate aldolase OS=Mus musculus OX=10090 GN=Dera PE=1 SV=1	24	5	6	5	318	35	8.72	5.98	116.2	112.2	129.2	81.3	82	79.2	1.47464	0.001799	0.560362	232449
Q61462	Cyba	Cytochrome b-245 light chain OS=Mus musculus OX=10090 GN=Cyba PE=1 SV=3	8	1	2	1	192	20.7	9.23	2.48	117.4	119.7	120.2	75.6	80.2	86.8	1.4728	0.000341	0.558557	13057
Q7TND5	Rpf1	Ribosome production factor 1 OS=Mus musculus OX=10090 GN=Rpf1 PE=2 SV=2	2	1	1	1	349	40	9.99	1.66	122.5	109.3	125.5	80.7	82.9	79.2	1.47158	0.001693	0.557368	70285
P06240	Lck	Proto-oncogene tyrosine-protein kinase LCK OS=Mus musculus OX=10090 GN=Lck PE=1 SV=4	10	4	5	3	509	57.9	5.25	7.64	114.3	121.4	121.6	83.5	76.9	82.4	1.47158	0.000267	0.557368	16818
Q91W97	Hkdc1	Putative hexokinase HKDC1 OS=Mus musculus OX=10090 GN=Hkdc1 PE=2 SV=1	9	7	7	6	915	102.2	7.09	11.38	120.9	116.9	119.4	80.6	82.9	79.3	1.47117	1.71e-05	0.556964	216019
P01900	H2-D1	H-2 class I histocompatibility antigen, D-D alpha chain OS=Mus musculus OX=10090 GN=H2-D1 PE=1 SV=1	35	13	30	8	365	41.1	6.65	50.19	117.5	118.6	121	83	76.4	83.4	1.47076	0.000107	0.55656	14964
P15702	Spn	Leukosialin OS=Mus musculus OX=10090 GN=Spn PE=1 SV=1	10	2	3	2	395	40	4.96	3.64	119.5	121.3	116.4	74.5	85.2	83.2	1.47056	0.000443	0.55637	20737
A0A0B4J1J6	Ighv10-1	Immunoglobulin heavy variable 10-1 (Fragment) OS=Mus musculus OX=10090 GN=Ighv10-1 PE=4 SV=1	26	3	4	3	119	13.5	8.59	9.44	118.2	119.5	119.3	82	85	75.8	1.47035	0.000155	0.556156	-
Q921K2	Parp1	Poly [ADP-ribose] polymerase OS=Mus musculus OX=10090 GN=Parp1 PE=1 SV=1	26	26	33	26	1014	112.7	8.95	42.89	120.8	117.5	118.8	80.9	81.4	80.6	1.47015	2.71e-06	0.555965	11545
Q9ERL7	Gmfg	Glia maturation factor gamma OS=Mus musculus OX=10090 GN=Gmfg PE=1 SV=1	19	4	6	3	142	16.7	5.71	15.8	124.2	113.6	119.2	78.4	83.7	80.9	1.46914	0.000375	0.554968	63986
Q8R5A3	Apbb1ip	Amyloid beta A4 precursor protein-binding family B member 1-interacting protein OS=Mus musculus OX=10090 GN=Apbb1ip PE=1 SV=2	8	5	7	4	670	74.3	5.35	9.2	118.3	119.3	119.2	80.2	80.5	82.4	1.46771	9.61e-07	0.553566	54519
Q60767	Ly75	Lymphocyte antigen 75 OS=Mus musculus OX=10090 GN=Ly75 PE=1 SV=2	3	5	5	5	1723	197.2	6.39	2.82	114.6	122.5	119.7	74.8	87.7	80.7	1.46711	0.000991	0.552972	17076
O08997	Atox1	Copper transport protein ATOX1 OS=Mus musculus OX=10090 GN=Atox1 PE=1 SV=1	32	2	5	2	68	7.3	6.51	10.6	119.7	118.5	118.5	80	84	79.3	1.46609	1.54e-05	0.551975	11927
O08992	Sdcbp	Syntenin-1 OS=Mus musculus OX=10090 GN=Sdcbp PE=1 SV=1	2	1	2	1	299	32.4	7.15	5.08	118.7	121.5	116.5	75.9	83.4	84	1.46609	0.000223	0.551975	53378
Q9ET01	Pygl	Glycogen phosphorylase, liver form OS=Mus musculus OX=10090 GN=Pygl PE=1 SV=4	36	30	57	26	850	97.4	7.09	89.41	118.9	117.6	120.2	80.8	81.6	81	1.46549	1.13e-06	0.551382	110095
G3UY52	Usp9x	Probable ubiquitin carboxyl-terminal hydrolase FAF-X (Fragment) OS=Mus musculus OX=10090 GN=Usp9x PE=1 SV=1	16	2	3	1	174	20.5	6.64	6.52	115.4	126.1	115.1	90.3	76.9	76.2	1.46508	0.00296	0.550977	22284
B5THE2	Mgam	Maltase-glucoamylase OS=Mus musculus OX=10090 GN=Mgam PE=1 SV=1	2	3	3	3	1827	208.4	5.95	5.8	114.5	119.1	123	79.4	82.5	81.5	1.46508	0.000135	0.550977	232714
Q6NZM8	Papss1	3'-phosphoadenosine 5'-phosphosulfate synthase 1, isoform CRA_a OS=Mus musculus OX=10090 GN=Papss1 PE=1 SV=1	2	1	1	1	603	68.5	6.61	1.7	109.4	120.6	126.6	84.4	85.2	73.8	1.46508	0.003767	0.550977	23971
A2A9I0	Gosr2	Golgi SNAP receptor complex member 2 OS=Mus musculus OX=10090 GN=Gosr2 PE=1 SV=1	11	2	3	2	165	19.6	9.5	2.21	119.7	119.4	117.3	78.2	83.2	82.1	1.46365	2.43e-05	0.549576	56494
Q3UIR3	Dtx3l	E3 ubiquitin-protein ligase DTX3L OS=Mus musculus OX=10090 GN=Dtx3l PE=1 SV=1	11	7	7	7	748	83	8.09	13.22	112.4	122.6	121.3	84.8	78.7	80.1	1.46264	0.000529	0.548579	209200
Q99KV1	Dnajb11	DnaJ homolog subfamily B member 11 OS=Mus musculus OX=10090 GN=Dnajb11 PE=1 SV=1	27	9	17	9	358	40.5	6.32	33.82	118.4	118.5	119.5	77.4	87.3	79.1	1.46185	0.000259	0.547799	67838
Q9CYN2	Spcs2	Signal peptidase complex subunit 2 OS=Mus musculus OX=10090 GN=Spcs2 PE=1 SV=1	41	9	12	9	226	25	8.57	22.88	123.5	114.4	118.3	83.3	78.2	82.3	1.46103	0.000256	0.54699	66624
A0A1B0GS44	Tmem192	Transmembrane protein 192 OS=Mus musculus OX=10090 GN=Tmem192 PE=1 SV=1	6	1	1	1	258	29.1	8.53	1.68	104.6	125.1	126.5	103.6	62.3	77.9	1.46103	0.055084	0.54699	73067
P97372	Psme2	Proteasome activator complex subunit 2 OS=Mus musculus OX=10090 GN=Psme2 PE=1 SV=4	25	6	8	6	239	27	5.76	18.61	120	111.4	124.7	85.2	74.6	84.1	1.46002	0.001905	0.545993	19188
A0A075B5R4	Ighv14-1	Immunoglobulin heavy variable 14-1 (Fragment) OS=Mus musculus OX=10090 GN=Ighv14-1 PE=4 SV=1	26	3	6	3	117	13	4.93	12.6	122.7	115.4	117.9	80.9	81.5	81.6	1.45902	6.49e-05	0.544996	-
A0A075B5M3	Igkv4-58	Immunoglobulin kappa variable 4-58 OS=Mus musculus OX=10090 GN=Igkv4-58 PE=1 SV=1	30	2	2	2	97	10.3	7.28	2.9	117.7	111.5	126.8	90	67.7	86.3	1.45902	0.010424	0.544996	-
O89023	Tpp1	Tripeptidyl-peptidase 1 OS=Mus musculus OX=10090 GN=Tpp1 PE=1 SV=2	4	2	2	2	562	61.3	6.57	3.14	122.1	113.2	120.7	89.1	71.7	83.2	1.45902	0.003012	0.544996	12751
Q8C147	Dock8	Dedicator of cytokinesis protein 8 OS=Mus musculus OX=10090 GN=Dock8 PE=1 SV=4	7	13	14	13	2100	238.8	6.96	29.43	117.8	120.3	117.8	80.9	84.2	79	1.45801	2.76e-05	0.544	76088
Q99LB4	Capg	Capping protein (Actin filament), gelsolin-like OS=Mus musculus OX=10090 GN=Capg PE=1 SV=1	19	5	11	5	349	38.7	6.95	21.98	112.8	119.9	123.1	79.1	81.6	83.5	1.457	0.000353	0.543003	12332
Q7TS64	Grk2	G protein-coupled receptor kinase OS=Mus musculus OX=10090 GN=Grk2 PE=1 SV=1	19	10	11	10	647	75.1	7.17	21.23	119.5	117.2	118.9	76.7	85.5	82.2	1.45499	0.000153	0.541011	110355
Q6P0X1	Pfdn4	Prefoldin 4 OS=Mus musculus OX=10090 GN=Pfdn4 PE=1 SV=1	16	1	1	1	77	8.7	4.26	2.71	115.2	118	122.4	83.2	72.9	88.3	1.45499	0.001754	0.541011	109054
A6H6A9	Rabgap1l	Rab GTPase-activating protein 1-like OS=Mus musculus OX=10090 GN=Rabgap1l PE=1 SV=1	2	2	2	2	815	92.3	5.31	3.59	107.3	122.9	125.4	74.2	84.9	85.4	1.4544	0.005344	0.540421	29809
Q52KC3	Mcm5	DNA helicase OS=Mus musculus OX=10090 GN=Mcm5 PE=1 SV=1	12	7	8	7	734	82.4	8.29	12.16	117.8	117.7	119.9	81.8	82.6	80.2	1.45298	3.29e-06	0.539019	17218
D3Z7R9	Ccpg1	Cell cycle progression 1, isoform CRA_d OS=Mus musculus OX=10090 GN=Ccpg1 PE=1 SV=1	4	3	3	3	778	89.1	6.06	1.96	125.3	114.6	115.5	84.9	79.9	79.9	1.45239	0.000636	0.53843	72278
D6RJK7	Tmf1	TATA element modulatory factor OS=Mus musculus OX=10090 GN=Tmf1 PE=1 SV=1	2	2	2	2	784	87	4.91	2.21	74.3	119	162.1	86.2	73.1	85.4	1.45239	0.224388	0.53843	232286
Q91VW3	Sh3bgrl3	SH3 domain-binding glutamic acid-rich-like protein 3 OS=Mus musculus OX=10090 GN=Sh3bgrl3 PE=1 SV=1	47	5	7	5	93	10.5	5.14	11.83	122	116.6	116.7	78.4	72	94.3	1.45198	0.005807	0.538024	73723
Q8K3K7	Agpat2	1-acyl-sn-glycerol-3-phosphate acyltransferase beta OS=Mus musculus OX=10090 GN=Agpat2 PE=1 SV=1	7	2	2	2	278	31	8.88	3.9	120.3	127	107.7	68	86.1	90.9	1.44898	0.015054	0.535038	67512
Q9CYH6	Rrs1	Ribosome biogenesis regulatory protein homolog OS=Mus musculus OX=10090 GN=Rrs1 PE=1 SV=1	6	2	2	2	365	41.5	10.77	4.94	106.8	114.6	133.4	82.2	73.6	89.3	1.44757	0.015924	0.533635	59014
Q9D0F3	Lman1	Protein ERGIC-53 OS=Mus musculus OX=10090 GN=Lman1 PE=1 SV=1	28	12	22	12	517	57.8	6.34	42.79	117.9	115.6	121.3	85.1	76.5	83.6	1.44698	0.000307	0.533047	70361
Q3UQ84	Tars2	Threonine--tRNA ligase, mitochondrial OS=Mus musculus OX=10090 GN=Tars2 PE=1 SV=1	3	2	2	2	723	81.6	7.87	2.41	110.9	134.2	109.7	74.5	67.7	103	1.44698	0.053031	0.533047	71807
Q9D6N1	Ca13	Carbonic anhydrase 13 OS=Mus musculus OX=10090 GN=Ca13 PE=1 SV=1	4	1	2	1	262	29.5	6.65	2.03	113.6	121.1	120.1	85.7	78.9	80.7	1.44639	0.000301	0.532459	-
Q60710	Samhd1	Deoxynucleoside triphosphate triphosphohydrolase SAMHD1 OS=Mus musculus OX=10090 GN=Samhd1 PE=1 SV=3	40	23	52	2	658	75.8	7.93	88.54	119.6	117.7	117.3	80.4	82.9	82.1	1.44499	3.72e-06	0.531058	56045
O08795	Prkcsh	Glucosidase 2 subunit beta OS=Mus musculus OX=10090 GN=Prkcsh PE=1 SV=1	25	13	20	13	521	58.8	4.46	30.9	121.9	118	114.6	81	81.6	82.9	1.44399	7.62e-05	0.530063	19089
Q6ZQM8	Ugt1a7c	UDP-glucuronosyltransferase 1-7C OS=Mus musculus OX=10090 GN=Ugt1a7c PE=1 SV=1	11	6	7	4	531	59.7	8.35	13.19	121	113.7	119.8	81.3	76.6	87.6	1.44399	0.000744	0.530063	394432
O88325	Naglu	Alpha-N-acetylglucosaminidase OS=Mus musculus OX=10090 GN=Naglu PE=1 SV=1	11	7	8	7	739	82.5	6.61	13.13	122.1	118	114.3	82.5	77.9	85.2	1.443	0.000306	0.529068	27419
Q99KQ4	Nampt	Nicotinamide phosphoribosyltransferase OS=Mus musculus OX=10090 GN=Nampt PE=1 SV=1	28	12	16	12	491	55.4	7.15	33.04	116.1	117.4	120.7	78	84.9	82.8	1.44159	0.000124	0.527666	59027
Q91UZ5	Impa2	Inositol monophosphatase 2 OS=Mus musculus OX=10090 GN=Impa2 PE=1 SV=1	6	2	3	2	290	31.7	6.23	6.58	114.6	118.4	121.2	83.4	79.4	82.9	1.44159	9.38e-05	0.527666	114663
Q9D3B1	Hacd2	Very-long-chain (3R)-3-hydroxyacyl-CoA dehydratase 2 OS=Mus musculus OX=10090 GN=Hacd2 PE=1 SV=1	4	1	1	1	254	28.4	9.58	2.26	115.1	122.8	116.4	87.7	74.2	83.9	1.44142	0.001499	0.527487	70757
Q8VEE0	Rpe	Ribulose-phosphate 3-epimerase OS=Mus musculus OX=10090 GN=Rpe PE=1 SV=1	7	2	3	2	228	24.9	5.41	4.17	117.2	121.8	115.2	85.2	78	82.6	1.44101	0.00023	0.527079	66646
O88824	Jtb	Protein JTB OS=Mus musculus OX=10090 GN=Jtb PE=1 SV=1	14	2	2	2	146	16.3	8.19	4.98	116.7	107.7	129.8	87.2	78.8	79.8	1.44101	0.006492	0.527079	23922
Q9CWF2	Tubb2b	Tubulin beta-2B chain OS=Mus musculus OX=10090 GN=Tubb2b PE=1 SV=1	35	14	72	1	445	49.9	4.89	114	111.5	123.6	119	92.1	73.5	80.2	1.4406	0.005092	0.526672	73710
Q01514	Gbp1	Guanylate-binding protein 1 OS=Mus musculus OX=10090 GN=Gbp1 PE=1 SV=1	25	16	21	13	589	67.7	5.54	41.18	118.4	117.6	118.1	81.4	82.2	82.2	1.4406	5.57e-08	0.526672	-
P34884	Mif	Macrophage migration inhibitory factor OS=Mus musculus OX=10090 GN=Mif PE=1 SV=2	14	2	3	2	115	12.5	7.34	4.53	116.4	114.6	123.1	88.1	77	80.7	1.4406	0.000974	0.526672	17319
A0A0R4J138	Arsb	Arylsulfatase B OS=Mus musculus OX=10090 GN=Arsb PE=1 SV=1	6	3	4	3	534	59.7	7.14	5.36	119.3	117.3	117.5	81.3	82.8	81.8	1.44002	1.27e-06	0.526085	11881
Q2YDW2	Msto1	Protein misato homolog 1 OS=Mus musculus OX=10090 GN=Msto1 PE=1 SV=1	1	1	1	1	556	61.2	6.49	2.34	123	111.2	119.9	79.9	92.2	73.9	1.43943	0.00501	0.525499	229524
Q6BCL1	Pram1	PML-RARA-regulated adapter molecule 1 OS=Mus musculus OX=10090 GN=Pram1 PE=1 SV=2	1	1	1	1	675	75.5	9.63	2.34	112.6	122.1	119.3	83.9	76.4	85.7	1.43902	0.000849	0.525091	378460
G5E899	Serpine1	Plasminogen activator inhibitor 1 OS=Mus musculus OX=10090 GN=Serpine1 PE=1 SV=1	1	1	1	1	402	45	6.47	2.25	113.7	110.9	129.3	81.9	81.9	82.3	1.43803	0.003291	0.524097	18787
Q3TGF2	Fam107b	Protein FAM107B OS=Mus musculus OX=10090 GN=Fam107b PE=1 SV=2	39	5	7	5	131	15.6	8.31	10.83	114	118	121.7	84.1	80	82.1	1.43664	0.000142	0.522696	66540
A0A1B0GRU8	Prpf40a	Pre-mRNA-processing factor 40 homolog A OS=Mus musculus OX=10090 GN=Prpf40a PE=1 SV=1	11	10	14	10	926	105.5	7.99	17.27	120.7	115.3	117.7	81.2	80.4	84.7	1.43605	6.26e-05	0.52211	56194
O35368	Ifi203	Interferon-activable protein 203 OS=Mus musculus OX=10090 GN=Ifi203 PE=1 SV=1	3	1	1	1	408	46.3	9.35	1.72	119.6	115.3	118.8	80.3	82.3	83.8	1.43547	2.78e-05	0.521524	15950
Q78PG9	Ccdc25	Coiled-coil domain-containing protein 25 OS=Mus musculus OX=10090 GN=Ccdc25 PE=1 SV=1	13	3	3	3	208	24.5	6.95	8.59	121.3	117.9	114.5	76.9	88.5	81	1.43547	0.000803	0.521524	67179
P50427	Sts	Steryl-sulfatase OS=Mus musculus OX=10090 GN=Sts PE=1 SV=1	11	7	7	7	624	66.5	8.5	16.38	117.9	117.8	117.9	81.9	81.5	83	1.43507	1.5e-07	0.521116	-
P01633	Igk-V19-17	Ig kappa chain V19-17 OS=Mus musculus OX=10090 GN=Igk-V19-17 PE=1 SV=1	20	2	6	1	149	16.4	6.92	8.4	125.7	120	107.8	76	89.8	80.7	1.43408	0.005847	0.520122	-
Q9JHU9	Isyna1	Inositol-3-phosphate synthase 1 OS=Mus musculus OX=10090 GN=Isyna1 PE=1 SV=1	15	7	10	7	557	60.9	6.42	17.08	118.4	114.7	120.3	81.6	83.7	81.3	1.43309	3.93e-05	0.519129	71780
Q9R111	Gda	Guanine deaminase OS=Mus musculus OX=10090 GN=Gda PE=1 SV=1	27	12	21	12	454	51	5.53	38.35	116.8	118.2	118.4	81.7	83.7	81.2	1.43309	2.6e-06	0.519129	14544
Q9DBR1	Xrn2	5'-3' exoribonuclease 2 OS=Mus musculus OX=10090 GN=Xrn2 PE=1 SV=1	4	4	4	4	951	108.6	7.59	8.92	121.5	115.3	116.5	85.4	78.4	82.9	1.4321	0.00022	0.518136	24128
P97377	Cdk2	Cyclin-dependent kinase 2 OS=Mus musculus OX=10090 GN=Cdk2 PE=1 SV=2	14	4	4	3	346	39	8.54	2.61	121.2	119.1	113	76.1	84.6	86	1.4321	0.000847	0.518136	12566
P97816	S100g	Protein S100-G OS=Mus musculus OX=10090 GN=S100g PE=1 SV=3	44	4	7	4	79	9	4.75	16.23	119.1	119.3	114.9	77.3	85	84.4	1.4321	0.000241	0.518136	12309
E9QJV4	Prpf39	Pre-mRNA-processing factor 39 OS=Mus musculus OX=10090 GN=Prpf39 PE=1 SV=1	6	3	3	3	665	77.9	5.44	2.64	101.4	118.5	133.4	81.7	84.2	80.9	1.43152	0.018811	0.517552	328110
Q9Z1E4	Gys1	Glycogen [starch] synthase, muscle OS=Mus musculus OX=10090 GN=Gys1 PE=1 SV=2	6	5	5	5	738	83.9	6.11	6.42	120.4	117.6	115.2	79.6	79.4	87.9	1.43054	0.000368	0.516559	14936
Q99N16	Cyp4f3	Leukotriene-B(4) omega-hydroxylase 2 OS=Mus musculus OX=10090 GN=Cyp4f3 PE=1 SV=2	2	1	1	1	524	59.8	8.53	1.61	105.8	122.2	125.1	74	91.1	81.8	1.43013	0.010418	0.51615	-
A0A140T8M4	Igkv8-19	Immunoglobulin kappa variable 8-19 OS=Mus musculus OX=10090 GN=Igkv8-19 PE=1 SV=2	30	2	2	2	101	11.1	5.25	4.37	127.6	116.5	108.9	90.6	82.7	73.6	1.42973	0.008458	0.515742	-
Q9Z2G6	Sel1l	Protein sel-1 homolog 1 OS=Mus musculus OX=10090 GN=Sel1l PE=1 SV=2	12	9	12	9	790	88.3	5.57	19.78	118.8	115.8	118.4	83.3	81.2	82.5	1.42915	6.06e-06	0.515157	20338
E9PV44	Atpif1	ATPase inhibitor, mitochondrial OS=Mus musculus OX=10090 GN=Atpif1 PE=1 SV=1	23	2	4	2	74	8.8	9.31	4.24	119	116.4	117.6	78.8	85.8	82.4	1.42915	8.12e-05	0.515157	11983
P49138	Mapkapk2	MAP kinase-activated protein kinase 2 OS=Mus musculus OX=10090 GN=Mapkapk2 PE=1 SV=2	18	8	10	5	386	44	8.57	19.95	117	116	120	82.4	81.7	82.9	1.42915	9.36e-06	0.515157	17164
A0A1D5RLD1	Myo9b	Unconventional myosin-IXb OS=Mus musculus OX=10090 GN=Myo9b PE=1 SV=1	5	9	10	9	1963	222.5	8.4	17.18	119.4	115.2	118.4	84.6	82.4	80.1	1.42857	4.12e-05	0.514573	17925
Q04750	Top1	DNA topoisomerase 1 OS=Mus musculus OX=10090 GN=Top1 PE=1 SV=2	28	22	34	22	767	90.8	9.33	56.88	117.3	118.3	117.3	81.4	81	84.7	1.42817	8.49e-06	0.514165	21969
Q78IS1	Tmed3	Transmembrane emp24 domain-containing protein 3 OS=Mus musculus OX=10090 GN=Tmed3 PE=1 SV=1	10	2	3	2	221	25.4	5.96	9.39	121.9	111.7	119.3	79.2	84.7	83.3	1.42759	0.000534	0.513581	66111
D3YX80	Wdr33	pre-mRNA 3' end-processing protein WDR33 OS=Mus musculus OX=10090 GN=Wdr33 PE=1 SV=2	4	1	1	1	271	31.4	8.97	1.67	129.6	102.6	120.6	77.8	78.6	90.8	1.42718	0.017269	0.513171	74320
Q80YW0	Cyth4	Cytohesin-4 OS=Mus musculus OX=10090 GN=Cyth4 PE=1 SV=1	11	4	4	4	393	45.3	6.65	8.31	115.4	122.4	114.9	79.4	79.3	88.5	1.42678	0.000833	0.512763	72318
Q9Z256	P2rx4	P2X purinoceptor OS=Mus musculus OX=10090 GN=P2rx4 PE=1 SV=1	6	3	3	3	361	40.3	7.44	5.01	116	121	115.8	84	75.6	87.7	1.42661	0.000891	0.512588	18438
A2AL50	Agps	Alkylglycerone-phosphate synthase OS=Mus musculus OX=10090 GN=Agps PE=1 SV=1	16	9	9	9	671	74.3	7.66	22.57	118.4	117.2	117	82.1	85.6	79.6	1.4258	4.03e-05	0.511771	228061
Q3TCN2	Plbd2	Putative phospholipase B-like 2 OS=Mus musculus OX=10090 GN=Plbd2 PE=1 SV=2	4	2	4	2	594	66.2	6.13	8.25	119.5	115.9	117.2	81.7	83	82.6	1.4258	6.19e-06	0.511771	71772
Q9JKN1	Slc30a7	Zinc transporter 7 OS=Mus musculus OX=10090 GN=Slc30a7 PE=1 SV=1	7	2	3	2	378	41.8	6.84	6.16	116.7	116.7	119.2	76.6	83.8	87	1.42522	0.000387	0.511187	66500
Q9D2V7	Coro7	Coronin-7 OS=Mus musculus OX=10090 GN=Coro7 PE=1 SV=2	18	13	18	13	922	100.7	5.77	36.32	116.2	119.4	116.9	81.3	84.1	82	1.42482	1.08e-05	0.510778	78885
P49710	Hcls1	Hematopoietic lineage cell-specific protein OS=Mus musculus OX=10090 GN=Hcls1 PE=1 SV=2	24	12	16	12	486	54.2	4.84	26.31	117.9	119.4	115.2	81.1	82.7	83.6	1.42482	1.65e-05	0.510778	15163
P84228	Hist1h3b	Histone H3.2 OS=Mus musculus OX=10090 GN=Hist1h3b PE=1 SV=2	60	9	48	3	136	15.4	11.27	91.75	118.8	117	116.7	81.5	84.5	81.5	1.42424	8.11e-06	0.510194	-
E9Q137	Tex264	Testis-expressed gene 264 OS=Mus musculus OX=10090 GN=Tex264 PE=1 SV=1	2	1	1	1	309	33.6	5.4	2.16	96.8	118.6	137	77.7	89.4	80.5	1.42326	0.045148	0.509202	21767
A0A217FL60	Eipr1	EARP-interacting protein OS=Mus musculus OX=10090 GN=Eipr1 PE=1 SV=1	7	1	1	1	135	15.2	6.06	2.35	122.9	114	115.5	72	87.9	87.8	1.42269	0.004236	0.50862	380752
Q9WV32	Arpc1b	Actin-related protein 2/3 complex subunit 1B OS=Mus musculus OX=10090 GN=Arpc1b PE=1 SV=4	24	7	18	7	372	41	8.35	42	119.5	116.3	116.5	82.9	79.1	85.7	1.42229	8.85e-05	0.508211	11867
Q9CQW2	Arl8b	ADP-ribosylation factor-like protein 8B OS=Mus musculus OX=10090 GN=Arl8b PE=1 SV=1	14	3	5	2	186	21.5	8.43	6.96	121.7	117.1	113.5	79.8	85.6	82.3	1.42229	0.000277	0.508211	67166
Q9R0E1	Plod3	Procollagen-lysine,2-oxoglutarate 5-dioxygenase 3 OS=Mus musculus OX=10090 GN=Plod3 PE=1 SV=1	6	5	5	5	741	84.9	6.23	7.87	117.1	119.7	115.5	78.8	86.7	82.2	1.42229	0.000177	0.508211	26433
Q9DBP5	Cmpk1	UMP-CMP kinase OS=Mus musculus OX=10090 GN=Cmpk1 PE=1 SV=1	34	6	14	6	196	22.2	5.83	24.14	118.1	119.4	114.7	82.3	80	85.5	1.42131	8.11e-05	0.507219	66588
Q9EQH2	Erap1	Endoplasmic reticulum aminopeptidase 1 OS=Mus musculus OX=10090 GN=Erap1 PE=1 SV=2	11	10	19	10	930	106.5	6.2	28.14	117.8	118.9	115.5	81.8	83.6	82.5	1.42073	6.66e-06	0.506636	80898
E9Q0H6	Fabp7	Fatty acid-binding protein, brain OS=Mus musculus OX=10090 GN=Fabp7 PE=1 SV=1	8	2	3	1	188	20.6	6.76	7.17	117.7	122.8	111.7	84.5	85	78.4	1.42073	0.00083	0.506636	12140
Q08943	Ssrp1	FACT complex subunit SSRP1 OS=Mus musculus OX=10090 GN=Ssrp1 PE=1 SV=2	7	4	5	4	708	80.8	6.76	12.92	121.9	118.2	112	78.4	80.4	89.1	1.42033	0.001361	0.506227	20833
V9GXJ1	Gm28036	Uncharacterized protein OS=Mus musculus OX=10090 GN=Gm28036 PE=4 SV=1	9	7	8	7	658	71.1	9.03	4.8	114.3	123.9	113.8	83.3	75.9	88.7	1.41993	0.002191	0.505817	-
F6WIU1	Kri1	Protein KRI1 homolog OS=Mus musculus OX=10090 GN=Kri1 PE=1 SV=2	6	4	4	4	705	82.2	5.15	7.25	116.2	119.7	116.2	81.3	84.4	82.3	1.41976	1.97e-05	0.505645	215194
Q80W54	Zmpste24	CAAX prenyl protease 1 homolog OS=Mus musculus OX=10090 GN=Zmpste24 PE=1 SV=2	3	2	2	2	475	54.7	6.95	2.22	114.2	118.9	119	81.9	89.7	76.4	1.41976	0.00114	0.505645	230709
Q5F2D9	Arrb2	Arrestin, beta 2 OS=Mus musculus OX=10090 GN=Arrb2 PE=1 SV=1	8	2	2	2	406	45.7	7.83	4.43	113.7	119.7	118.6	84.7	85.5	77.8	1.41935	0.000347	0.505235	216869
Q5SSF7	Tent5c	Terminal nucleotidyltransferase 5C OS=Mus musculus OX=10090 GN=Tent5c PE=1 SV=1	2	1	1	1	391	44.8	5.4	1.7	115.8	120.6	115.6	83	89	76	1.41935	0.001069	0.505235	74645
Q9CXW3	Cacybp	Calcyclin-binding protein OS=Mus musculus OX=10090 GN=Cacybp PE=1 SV=1	38	7	13	7	229	26.5	7.87	18.89	117.9	115.8	118.2	81.8	82	84.3	1.41838	6.12e-06	0.504244	12301
O55098	Stk10	Serine/threonine-protein kinase 10 OS=Mus musculus OX=10090 GN=Stk10 PE=1 SV=2	14	14	16	13	966	111.8	7.15	32.89	117.4	116.3	118.1	84.4	82.1	81.7	1.41741	4.05e-06	0.503252	20868
Q9ERN0	Scamp2	Secretory carrier-associated membrane protein 2 OS=Mus musculus OX=10090 GN=Scamp2 PE=1 SV=1	12	3	4	3	329	36.4	6.32	6.18	115.5	117.7	118.5	82.3	82.9	83	1.417	3.06e-06	0.502842	24044
P29341	Pabpc1	Polyadenylate-binding protein 1 OS=Mus musculus OX=10090 GN=Pabpc1 PE=1 SV=2	26	18	36	14	636	70.6	9.5	76.58	114.4	114.4	123	83	82.1	83.2	1.41683	0.000281	0.502671	18458
A0A087WQ86	Dock10	Dedicator of cytokinesis protein 10 OS=Mus musculus OX=10090 GN=Dock10 PE=1 SV=1	5	9	9	9	2175	248.4	7.12	7.75	109.9	123.2	118.7	78.1	89.9	80.3	1.41683	0.00293	0.502671	210293
Q9DCG2	Cd302	CD302 antigen OS=Mus musculus OX=10090 GN=Cd302 PE=1 SV=2	10	2	2	2	228	25.4	4.61	2.44	122.7	116.3	112.7	80.6	77.6	90.1	1.41643	0.001945	0.502261	66205
P09411	Pgk1	Phosphoglycerate kinase 1 OS=Mus musculus OX=10090 GN=Pgk1 PE=1 SV=4	64	25	52	25	417	44.5	7.9	95.73	119.2	116.1	116.3	82.6	82.2	83.6	1.41546	5.89e-06	0.50127	18655
Q8K426	Retnlg	Resistin-like gamma OS=Mus musculus OX=10090 GN=Retnlg PE=1 SV=1	23	3	3	3	117	12.5	7.39	3.73	121.7	109.7	120.2	90.9	72.8	84.7	1.41546	0.006172	0.50127	245195
Q9D061	Acbd6	Acyl-CoA-binding domain-containing protein 6 OS=Mus musculus OX=10090 GN=Acbd6 PE=1 SV=2	3	1	1	1	282	30.9	5.11	2.05	128.2	115.7	107.6	85.7	82.4	80.4	1.41449	0.005162	0.500279	72482
O35405	Pld3	Phospholipase D3 OS=Mus musculus OX=10090 GN=Pld3 PE=1 SV=1	13	6	10	6	488	54.4	6.52	20.22	117.1	120.7	113.7	79.8	90.3	78.5	1.41392	0.001277	0.499698	18807
P01872	Ighm	Immunoglobulin heavy constant mu OS=Mus musculus OX=10090 GN=Ighm PE=1 SV=2	36	17	36	17	454	49.9	7.01	76.37	117.4	116	118.1	82.6	82.7	83.3	1.41392	7.95e-07	0.499698	-
A0A0R4J049	Prmt5	Protein arginine N-methyltransferase 5 OS=Mus musculus OX=10090 GN=Prmt5 PE=1 SV=1	5	4	4	4	637	72.7	6.34	4.82	119	111.9	120.4	84	78.6	86.1	1.41254	0.000582	0.498297	27374
E9Q634	Myo1e	Unconventional myosin-Ie OS=Mus musculus OX=10090 GN=Myo1e PE=1 SV=1	13	13	15	11	1107	126.7	9.07	23.34	113.2	118.3	119.7	84.3	80.7	83.8	1.41158	0.000115	0.497307	71602
P03958	Ada	Adenosine deaminase OS=Mus musculus OX=10090 GN=Ada PE=1 SV=3	36	11	22	11	352	40	5.72	45.34	118	113.7	119.4	83.4	79.4	86	1.41117	0.000188	0.496896	11486
P26323	Fli1	Friend leukemia integration 1 transcription factor OS=Mus musculus OX=10090 GN=Fli1 PE=1 SV=1	4	2	2	2	452	51	7.06	4.25	119.6	117.3	114.1	80.9	94.7	73.5	1.40907	0.006104	0.494746	14247
Q64516	Gk	Glycerol kinase OS=Mus musculus OX=10090 GN=Gk PE=1 SV=2	21	11	13	11	559	61.2	5.87	19.44	115.4	117.9	117.4	84.8	82.4	82.1	1.40674	7.87e-06	0.492355	14933
P40142	Tkt	Transketolase OS=Mus musculus OX=10090 GN=Tkt PE=1 SV=1	48	29	79	29	623	67.6	7.5	131.99	120.2	114.8	115.7	81.6	84.8	82.9	1.40674	6.01e-05	0.492355	21881
P20029	Hspa5	Endoplasmic reticulum chaperone BiP OS=Mus musculus OX=10090 GN=Hspa5 PE=1 SV=3	58	43	144	40	655	72.4	5.16	277.11	119.2	114.3	117.2	83.9	81.2	84.2	1.40674	3.89e-05	0.492355	14828
A0A1B0GR60	Ftl1	Ferritin OS=Mus musculus OX=10090 GN=Ftl1 PE=1 SV=1	26	3	8	3	160	18	6.28	18.8	117.2	115.8	117.7	82.5	88.1	78.7	1.40674	0.000266	0.492355	14325
Q9JKC8	Ap3m1	AP-3 complex subunit mu-1 OS=Mus musculus OX=10090 GN=Ap3m1 PE=1 SV=1	15	6	7	6	418	46.9	6.93	7.17	117.9	118.5	114.3	86.7	76.3	86.3	1.40674	0.000753	0.492355	55946
A0A2I3BRW0	Spcs1	Signal peptidase complex subunit 1 OS=Mus musculus OX=10090 GN=Spcs1 PE=1 SV=1	13	2	4	2	102	11.8	9.31	5.61	119.3	119.4	111.9	78.4	90.2	80.7	1.40634	0.001528	0.491943	69019
Q9QYC7	Ggcx	Vitamin K-dependent gamma-carboxylase OS=Mus musculus OX=10090 GN=Ggcx PE=1 SV=1	4	3	4	3	757	87.1	8.02	2.69	111.9	121.6	117.1	81	89.5	78.8	1.40634	0.001422	0.491943	56316
G3X9U9	Fis1	Mitochondrial fission 1 protein OS=Mus musculus OX=10090 GN=Fis1 PE=1 SV=1	26	4	8	4	145	16.3	9.25	10.58	118.7	114.9	116.9	87.2	79.1	83.2	1.40481	0.0002	0.490375	66437
Q9CYN9	Atp6ap2	Renin receptor OS=Mus musculus OX=10090 GN=Atp6ap2 PE=1 SV=2	3	1	1	1	350	39.1	5.54	2.05	106.4	121.1	122.8	81.6	83.7	84.4	1.40288	0.003136	0.488395	70495
Q9Z2X2	Psmd10	26S proteasome non-ATPase regulatory subunit 10 OS=Mus musculus OX=10090 GN=Psmd10 PE=1 SV=3	15	3	3	3	231	25.1	6.06	4.88	119.3	115.8	115.1	88.3	75	86.4	1.40248	0.001532	0.487983	53380
Q5SWD9	Tsr1	Pre-rRNA-processing protein TSR1 homolog OS=Mus musculus OX=10090 GN=Tsr1 PE=1 SV=1	2	2	2	2	803	92	6.99	1.82	116.9	115.8	117.4	89.8	76.2	83.9	1.40096	0.001088	0.486416	104662
Q8BVU5	Nudt9	ADP-ribose pyrophosphatase, mitochondrial OS=Mus musculus OX=10090 GN=Nudt9 PE=1 SV=1	3	1	1	1	350	38.6	6.76	1.66	112.3	131.6	106.2	70.5	93.3	86.1	1.40096	0.030588	0.486416	74167
Q9DBJ1	Pgam1	Phosphoglycerate mutase 1 OS=Mus musculus OX=10090 GN=Pgam1 PE=1 SV=3	45	10	30	8	254	28.8	7.18	32.33	119.2	113.3	117.5	83.4	82	84.5	1.40056	6.13e-05	0.486004	18648
A0A140LIN6	Eed	Polycomb protein EED (Fragment) OS=Mus musculus OX=10090 GN=Eed PE=1 SV=1	14	2	2	2	118	13.8	9.22	4.15	114.4	117	118.6	83.6	84.8	81.5	1.40056	2.81e-05	0.486004	13626
A0A1Y7VP73	Dtnbp1	Dysbindin OS=Mus musculus OX=10090 GN=Dtnbp1 PE=1 SV=1	9	2	2	2	247	28.8	6.29	2.78	113.4	110.7	126	82.9	82.1	85	1.4004	0.002239	0.485839	94245
Q9Z1K5	Arih1	E3 ubiquitin-protein ligase ARIH1 OS=Mus musculus OX=10090 GN=Arih1 PE=1 SV=3	21	10	10	10	555	64	5.08	10.33	119.3	116.5	114.1	80.1	82.4	87.6	1.39904	0.000242	0.484437	23806
E9QP00	Tra2a	Transformer-2 protein homolog alpha OS=Mus musculus OX=10090 GN=Tra2a PE=1 SV=1	6	2	2	2	282	32.6	11.27	5	116.6	118.9	114.3	82.6	84.4	83.1	1.39864	2.04e-05	0.484026	101214
Q6PFA2	Clta	Clathrin light chain OS=Mus musculus OX=10090 GN=Clta PE=1 SV=1	32	8	10	8	218	23.6	4.5	18.66	117.5	117.1	115.2	88.1	82.2	79.9	1.39808	0.000199	0.483449	12757
Q9DC50	Crot	Peroxisomal carnitine O-octanoyltransferase OS=Mus musculus OX=10090 GN=Crot PE=1 SV=1	8	5	5	5	612	70.2	6.73	7.25	116.8	120.6	112.3	80.7	87.3	82.2	1.39768	0.000444	0.483036	74114
P41245	Mmp9	Matrix metalloproteinase-9 OS=Mus musculus OX=10090 GN=Mmp9 PE=1 SV=2	19	13	18	13	730	80.5	6.09	31.49	113.9	119.1	116.7	81.1	85.5	83.7	1.39712	7.35e-05	0.482459	17395
Q8CHP5	Pym1	Partner of Y14 and mago OS=Mus musculus OX=10090 GN=Pym1 PE=1 SV=2	48	5	6	5	203	22.7	9.5	10.14	115.1	121.6	112.9	79.2	93.2	77.9	1.39672	0.003971	0.482047	78428
Q9WV54	Asah1	Acid ceramidase OS=Mus musculus OX=10090 GN=Asah1 PE=1 SV=1	24	10	15	10	394	44.6	8.46	22.9	118.7	114	116.8	82.8	85.1	82.5	1.39577	3.2e-05	0.481058	11886
E9Q8I7	Nfxl1	Nuclear transcription factor, X-box-binding-like 1 OS=Mus musculus OX=10090 GN=Nfxl1 PE=1 SV=1	3	2	2	2	918	101.4	8.4	1.71	116	120	113.5	89.5	81.6	79.3	1.39577	0.000803	0.481058	100978
F7A4X5	Tnfrsf1a	Tumor necrosis factor receptor superfamily member 1A (Fragment) OS=Mus musculus OX=10090 GN=Tnfrsf1a PE=4 SV=1	4	1	1	1	295	32.1	6.73	2.38	101.4	125.5	122.6	84.3	81.4	84.7	1.39577	0.012561	0.481058	21937
Q05C51	Rnaseh2a	Ribonuclease OS=Mus musculus OX=10090 GN=Rnaseh2a PE=1 SV=1	3	1	1	1	254	28.1	5.07	1.93	119.5	112.3	117.7	88.9	87.9	73.6	1.39577	0.003603	0.481058	69724
Q5KU39	Vps41	Vacuolar protein sorting-associated protein 41 homolog OS=Mus musculus OX=10090 GN=Vps41 PE=1 SV=1	4	3	3	3	853	98.5	5.81	4.92	121.4	117.4	110.7	81	82.9	86.6	1.39521	0.000727	0.480482	218035
A2AQJ7	Tmem87a	Transmembrane protein 87A OS=Mus musculus OX=10090 GN=Tmem87a PE=1 SV=1	7	3	4	3	500	57	8.1	2.74	112.9	114.3	122.3	76.5	86.2	87.8	1.39521	0.001977	0.480482	211499
P61089	Ube2n	Ubiquitin-conjugating enzyme E2 N OS=Mus musculus OX=10090 GN=Ube2n PE=1 SV=1	39	6	13	6	152	17.1	6.57	14.61	118.3	115.9	115.1	83.1	84.1	83.4	1.39386	5.21e-06	0.47908	93765
Z4YKM2	Cisd3	CDGSH iron-sulfur domain-containing protein 3, mitochondrial OS=Mus musculus OX=10090 GN=Cisd3 PE=1 SV=1	13	2	2	2	115	13.1	9.83	4.85	121.7	111.2	116.4	89	76.8	85	1.39274	0.002207	0.477929	217149
Q9CQV4	Retreg3	Reticulophagy regulator 3 OS=Mus musculus OX=10090 GN=Retreg3 PE=1 SV=1	5	2	2	2	466	51.6	4.97	3.21	102.8	122.9	123.4	91.5	76.8	82.4	1.3925	0.015002	0.477678	67998
A2AF47	Dock11	Dedicator of cytokinesis protein 11 OS=Mus musculus OX=10090 GN=Dock11 PE=1 SV=1	5	8	9	7	2073	237.6	7.78	3.84	119.3	113	116.9	81	82	87.8	1.39234	0.000305	0.477516	75974
B2KGA7	Zbtb8os	Protein archease OS=Mus musculus OX=10090 GN=Zbtb8os PE=1 SV=1	6	1	1	1	167	19.6	4.56	2.01	116	113	120	70.7	89.4	90.9	1.39044	0.008654	0.475539	67106
Q3UC82	Lig3	DNA ligase OS=Mus musculus OX=10090 GN=Lig3 PE=1 SV=1	2	2	2	2	1011	112.6	8.98	4.73	97.8	117.7	133.4	82.6	83.2	85.2	1.39004	0.03422	0.475126	16882
Q9D6U8	Fam162a	Protein FAM162A OS=Mus musculus OX=10090 GN=Fam162a PE=1 SV=1	25	3	3	3	155	17.7	9.88	2.42	118.5	111.3	119.2	85	81.3	84.8	1.38989	0.000308	0.474966	70186
Q69ZF3	Gba2	Non-lysosomal glucosylceramidase OS=Mus musculus OX=10090 GN=Gba2 PE=1 SV=2	1	1	1	1	918	103.2	5.59	2.02	103	119	126.9	68.3	110.9	71.9	1.38949	0.10083	0.474551	230101
D6RCW4	Plpp5	Phospholipid phosphatase 5 OS=Mus musculus OX=10090 GN=Plpp5 PE=4 SV=1	19	1	1	1	53	6	7.18	1.73	105.4	132.5	111	90.1	97.1	63.9	1.38949	0.066911	0.474551	71910
A0A087WPJ5	Col3a1	Collagen alpha-1(III) chain (Fragment) OS=Mus musculus OX=10090 GN=Col3a1 PE=1 SV=1	4	1	2	1	245	25.7	6.39	5.09	108.8	129.7	110.3	90.3	74.2	86.6	1.38909	0.017241	0.474138	12825
B2RY04	Dock5	Dedicator of cytokinesis protein 5 OS=Mus musculus OX=10090 GN=Dock5 PE=1 SV=2	3	5	6	4	1868	214.3	7.55	12.51	114.1	117.6	117.2	87.4	81.4	82.4	1.38893	0.000113	0.473977	68813
Q8R0A0	Gtf2f2	General transcription factor IIF subunit 2 OS=Mus musculus OX=10090 GN=Gtf2f2 PE=1 SV=1	6	2	2	2	249	28.4	9.22	5.03	114.2	118.8	115.8	80.8	85.5	84.9	1.38854	8.35e-05	0.473564	68705
Q60973	Rbbp7	Histone-binding protein RBBP7 OS=Mus musculus OX=10090 GN=Rbbp7 PE=1 SV=1	20	7	7	2	425	47.8	5.05	19.22	108.9	110.4	129.4	80.3	82.5	88.6	1.38703	0.010023	0.472002	245688
O08692	Ngp	Neutrophilic granule protein OS=Mus musculus OX=10090 GN=Ngp PE=1 SV=1	56	10	22	10	167	19.3	5.31	38.37	117	115.9	115.8	85.3	84.8	81.3	1.38703	1.61e-05	0.472002	18054
P54923	Adprh	[Protein ADP-ribosylarginine] hydrolase OS=Mus musculus OX=10090 GN=Adprh PE=1 SV=1	15	5	9	5	362	40	5.76	21.64	114.1	118.4	116	79.6	88.2	83.6	1.38624	0.000311	0.471174	11544
Q9CPW4	Arpc5	Actin-related protein 2/3 complex subunit 5 OS=Mus musculus OX=10090 GN=Arpc5 PE=1 SV=3	71	9	21	9	151	16.3	5.67	42.31	116.9	115.9	115.7	83.9	83.4	84.2	1.38569	2.03e-07	0.4706	67771
A0A140T8Q3	Igkv6-17	Immunoglobulin kappa variable 6-17 (Fragment) OS=Mus musculus OX=10090 GN=Igkv6-17 PE=1 SV=2	26	2	6	1	115	12.8	5.81	8.4	114	127.2	107.3	86.8	88.3	76.5	1.38514	0.00955	0.470027	-
P58137	Acot8	Acyl-coenzyme A thioesterase 8 OS=Mus musculus OX=10090 GN=Acot8 PE=1 SV=1	7	2	3	2	320	35.8	7.64	2.9	116	114.5	117.9	85.1	87.2	79.3	1.38474	0.000228	0.469613	170789
Q8BX10	Pgam5	Serine/threonine-protein phosphatase PGAM5, mitochondrial OS=Mus musculus OX=10090 GN=Pgam5 PE=1 SV=1	11	3	4	3	288	32	9.04	8.58	109.2	123.6	115.5	83.4	85.3	82.9	1.38434	0.001594	0.469198	72542
C0HKG5	Rnaset2a	Ribonuclease T2-A OS=Mus musculus OX=10090 GN=Rnaset2a PE=1 SV=1	7	2	4	2	259	29.6	6.37	4.26	112.8	115.2	120.2	87.6	82	82.2	1.38284	0.000352	0.467638	100037283
Q9D8U8	Snx5	Sorting nexin-5 OS=Mus musculus OX=10090 GN=Snx5 PE=1 SV=1	45	16	24	16	404	46.8	6.62	38.03	116.2	115.7	116.2	82.6	84.9	84.3	1.38245	1.42e-06	0.467223	69178
A0A075B5K2	Igkv9-124	Immunoglobulin kappa chain variable 9-124 OS=Mus musculus OX=10090 GN=Igkv9-124 PE=1 SV=7	34	2	3	2	95	10.4	5.01	7.14	118.6	109.4	120.2	80.3	90.2	81.4	1.3823	0.002214	0.467066	-
Q9WVJ3	Cpq	Carboxypeptidase Q OS=Mus musculus OX=10090 GN=Cpq PE=1 SV=1	12	6	9	6	470	51.8	6.21	11.17	105	133.9	109.1	84.6	82.8	84.5	1.3815	0.023995	0.466237	54381
O54824	Il16	Pro-interleukin-16 OS=Mus musculus OX=10090 GN=Il16 PE=1 SV=3	6	7	11	7	1322	141.3	7.78	14.41	116.9	115.7	115.4	82.3	84.4	85.3	1.38095	5.68e-06	0.465663	16170
Q9CPT4	Mydgf	Myeloid-derived growth factor OS=Mus musculus OX=10090 GN=Mydgf PE=1 SV=1	13	2	3	2	166	18	6.79	8.9	118.2	116.4	113.3	83	87.4	81.6	1.38056	0.000145	0.465249	28106
Q62087	Pon3	Serum paraoxonase/lactonase 3 OS=Mus musculus OX=10090 GN=Pon3 PE=1 SV=2	29	10	23	9	354	39.3	5.74	29.95	117.1	114	116.8	79.5	83.6	88.9	1.38056	0.000382	0.465249	269823
P32037	Slc2a3	Solute carrier family 2, facilitated glucose transporter member 3 OS=Mus musculus OX=10090 GN=Slc2a3 PE=1 SV=1	6	3	4	3	493	53.4	4.98	10.13	118.2	117.5	112.2	78.6	93.4	80	1.38056	0.003267	0.465249	20527
D6RIQ3	Phyhd1	Phytanoyl-CoA dioxygenase domain-containing protein 1 OS=Mus musculus OX=10090 GN=Phyhd1 PE=1 SV=1	6	1	1	1	159	18	6.68	2.42	128.1	109.6	110.3	94	72.6	85.5	1.38041	0.021153	0.465092	227696
Q99JC1	Iglc2	Ig lambda-2 chain C region (Fragment) OS=Mus musculus OX=10090 GN=Iglc2 PE=1 SV=1	18	2	6	2	105	11.3	6.27	5.79	114	110.3	123.5	83.5	78.7	90	1.37906	0.003384	0.463689	-
Q5SSL4	Abr	Active breakpoint cluster region-related protein OS=Mus musculus OX=10090 GN=Abr PE=1 SV=1	14	11	13	11	859	97.6	6.58	23.96	113.1	116.6	118	84.6	85.5	82.1	1.37867	5.71e-05	0.463275	109934
Q9R1P4	Psma1	Proteasome subunit alpha type-1 OS=Mus musculus OX=10090 GN=Psma1 PE=1 SV=1	36	9	22	9	263	29.5	6.46	50.93	118.5	112.2	117	85.7	81.2	85.4	1.37812	0.000185	0.462703	26440
Q9D020	Nt5c3a	Cytosolic 5'-nucleotidase 3A OS=Mus musculus OX=10090 GN=Nt5c3a PE=1 SV=4	27	8	12	8	331	37.2	6.65	17.13	114.5	118.6	114.5	82.8	91.1	78.5	1.37718	0.001293	0.461716	-
Q6P9R1	Ddx51	ATP-dependent RNA helicase DDX51 OS=Mus musculus OX=10090 GN=Ddx51 PE=1 SV=1	1	1	1	1	639	70.3	9.47	1.74	115.4	118.2	114	83.7	82	86.7	1.37718	6.74e-05	0.461716	69663
Q8BVE3	Atp6v1h	V-type proton ATPase subunit H OS=Mus musculus OX=10090 GN=Atp6v1h PE=1 SV=1	17	6	9	6	483	55.8	6.61	7.92	115.3	118.9	113.3	81.8	90.9	79.8	1.37624	0.00112	0.46073	108664
Q9CPX6	Atg3	Ubiquitin-like-conjugating enzyme ATG3 OS=Mus musculus OX=10090 GN=Atg3 PE=1 SV=1	16	5	7	5	314	35.8	4.72	11.81	115.3	113.2	118.9	85.6	83.8	83.2	1.3753	6.37e-05	0.459743	67841
P0DOV2	Ifi204	Interferon-activable protein 204 OS=Mus musculus OX=10090 GN=Ifi204 PE=1 SV=1	15	9	9	3	619	69.4	8.69	13.21	111.5	111.1	124.8	85.8	77.9	88.9	1.3753	0.004752	0.459743	15951
Q9D7M1	Gid8	Glucose-induced degradation protein 8 homolog OS=Mus musculus OX=10090 GN=Gid8 PE=1 SV=1	4	1	1	1	228	26.8	4.97	2.35	117.7	114.9	114.7	75.8	85.6	91.2	1.3749	0.002368	0.459328	76425
A2AR02	Ppig	Peptidyl-prolyl cis-trans isomerase G OS=Mus musculus OX=10090 GN=Ppig PE=1 SV=1	3	2	2	2	752	88.3	10.27	2.88	111.7	119	116.7	84.4	85	83.3	1.37475	0.00014	0.459172	228005
A0A0G2JFX7	Rbm8a	RNA-binding protein 8A OS=Mus musculus OX=10090 GN=Rbm8a PE=1 SV=1	16	3	5	3	171	19.1	4.97	13.71	115.1	116.5	115.7	81.5	88.7	82.5	1.37436	0.000161	0.458757	60365
Q3UM18	Lsg1	Large subunit GTPase 1 homolog OS=Mus musculus OX=10090 GN=Lsg1 PE=1 SV=2	1	1	1	1	644	73.1	6.51	2.18	121.6	114.8	110.9	86.1	71.7	94.9	1.37436	0.01334	0.458757	224092
E9Q555	Rnf213	E3 ubiquitin-protein ligase RNF213 OS=Mus musculus OX=10090 GN=Rnf213 PE=1 SV=2	7	30	33	30	5152	584.4	6.8	36.62	116	118.7	112.5	83.2	86	83.5	1.37396	9.54e-05	0.458341	672511
D3Z6I4	Cryzl1	Crystallin, zeta (Quinone reductase)-like 1, isoform CRA_h OS=Mus musculus OX=10090 GN=Cryzl1 PE=1 SV=1	11	3	4	3	333	37	6.09	4.8	107.9	126.8	112.4	85.1	83.9	83.9	1.37248	0.005345	0.456784	66609
Q61749	Eif2b4	Translation initiation factor eIF-2B subunit delta OS=Mus musculus OX=10090 GN=Eif2b4 PE=1 SV=2	6	3	4	3	524	57.6	9.25	12.02	94.6	156.9	95.6	83.8	84.7	84.5	1.37194	0.202575	0.456214	13667
P56873	Sssca1	Sjoegren syndrome/scleroderma autoantigen 1 homolog OS=Mus musculus OX=10090 GN=Sssca1 PE=1 SV=1	26	3	4	3	199	21.3	5.12	1.91	122.5	111.7	112.8	88.1	85.2	79.7	1.37154	0.001763	0.455799	-
Q8BPU7	Elmo1	Engulfment and cell motility protein 1 OS=Mus musculus OX=10090 GN=Elmo1 PE=1 SV=2	21	15	17	15	727	83.9	6.28	34.97	110.6	127.5	108.8	83	84.8	85.3	1.37061	0.006455	0.454813	140580
O88531	Ppt1	Palmitoyl-protein thioesterase 1 OS=Mus musculus OX=10090 GN=Ppt1 PE=1 SV=2	25	7	12	7	306	34.5	8	20.96	117.3	115.6	114	82.7	84.5	86	1.37006	2.06e-05	0.454242	19063
D3YU12	Nmral1	NmrA-like family domain-containing protein 1 OS=Mus musculus OX=10090 GN=Nmral1 PE=1 SV=1	29	9	9	9	299	33.1	6.8	15.43	115.9	113.9	117	83.6	83.9	85.7	1.36967	9.86e-06	0.453826	67824
A0A140T8N0	Igkv9-120	Immunoglobulin kappa chain variable 9-120 (Fragment) OS=Mus musculus OX=10090 GN=Igkv9-120 PE=1 SV=2	31	2	4	2	117	12.8	4.88	5.59	108.4	116.6	121.8	87.7	72.4	93.1	1.36967	0.013055	0.453826	-
O88876	Dhrs3	Short-chain dehydrogenase/reductase 3 OS=Mus musculus OX=10090 GN=Dhrs3 PE=1 SV=2	17	4	4	4	302	33.6	8.69	10.96	111	123	112.7	91.5	89.8	72	1.36873	0.01286	0.452841	20148
P97494	Gclc	Glutamate--cysteine ligase catalytic subunit OS=Mus musculus OX=10090 GN=Gclc PE=1 SV=4	23	13	18	13	637	72.5	5.9	38.33	116.6	115.9	114.1	85.9	88.3	79.2	1.3678	0.000387	0.451855	14629
P20108	Prdx3	Thioredoxin-dependent peroxide reductase, mitochondrial OS=Mus musculus OX=10090 GN=Prdx3 PE=1 SV=1	6	2	2	2	257	28.1	7.58	2.63	113.8	113.5	119.3	79.3	92.8	81.3	1.3678	0.002526	0.451855	11757
Q9DBC3	Cmtr1	Cap-specific mRNA (nucleoside-2'-O-)-methyltransferase 1 OS=Mus musculus OX=10090 GN=Cmtr1 PE=1 SV=1	8	6	8	6	837	95.6	7.27	8.3	106.8	119.1	120.7	83.2	89.4	80.8	1.3678	0.00363	0.451855	74157
Q640N1	Aebp1	Adipocyte enhancer-binding protein 1 OS=Mus musculus OX=10090 GN=Aebp1 PE=1 SV=1	2	2	2	2	1128	128.3	5.08	2.47	116.1	121	109.5	83.2	87.3	83	1.36726	0.001011	0.451286	11568
A0A1Y7VN19	Dhrs7	Dehydrogenase/reductase SDR family member 7 (Fragment) OS=Mus musculus OX=10090 GN=Dhrs7 PE=1 SV=1	8	2	3	2	362	40.7	8.32	4.65	113.6	112.9	120.1	86.2	89.4	77.9	1.36726	0.001668	0.451286	66375
Q8CG48	Smc2	Structural maintenance of chromosomes protein 2 OS=Mus musculus OX=10090 GN=Smc2 PE=1 SV=2	6	7	7	7	1191	134.2	8.41	9.83	107.4	116.1	123	88.6	77.8	87.1	1.36686	0.005332	0.45087	14211
P17918	Pcna	Proliferating cell nuclear antigen OS=Mus musculus OX=10090 GN=Pcna PE=1 SV=2	24	5	8	5	261	28.8	4.77	11.54	116	118.2	112.3	89.3	86.2	78	1.36686	0.001211	0.45087	18538
Q9D8S4	Rexo2	Oligoribonuclease, mitochondrial OS=Mus musculus OX=10090 GN=Rexo2 PE=1 SV=2	14	4	5	4	237	26.7	7.15	2.29	113.1	114.9	118.5	84.4	79	90.1	1.36686	0.000975	0.45087	104444
Q9CRA5	Golph3	Golgi phosphoprotein 3 OS=Mus musculus OX=10090 GN=Golph3 PE=1 SV=1	16	3	5	3	298	33.7	6.44	11.87	121.9	113.5	111	84.4	82.2	86.9	1.36647	0.000967	0.450453	66629
Q62422	Ostf1	Osteoclast-stimulating factor 1 OS=Mus musculus OX=10090 GN=Ostf1 PE=1 SV=2	48	7	12	7	215	23.8	5.68	28.9	117.8	116.2	112.3	85.4	83.1	85.1	1.36554	6.55e-05	0.449467	20409
P63280	Ube2i	SUMO-conjugating enzyme UBC9 OS=Mus musculus OX=10090 GN=Ube2i PE=1 SV=1	23	5	9	5	158	18	8.66	27.95	118.2	111.6	116.5	83.2	87	83.4	1.36554	0.000188	0.449467	22196
Q3UGS4	Mcrip1	Mapk-regulated corepressor-interacting protein 1 OS=Mus musculus OX=10090 GN=Mcrip1 PE=1 SV=1	11	1	1	1	97	11.1	9.14	2.03	113.1	115.1	118.1	98.9	73.1	81.6	1.36554	0.016156	0.449467	192173
F8WHM5	Glg1	Golgi apparatus protein 1 (Fragment) OS=Mus musculus OX=10090 GN=Glg1 PE=1 SV=1	21	26	33	26	1163	132.3	6.93	69.31	116.5	112.9	117	85.9	80.2	87.6	1.36539	0.00028	0.449315	20340
Q80VJ2	Sra1	Steroid receptor RNA activator 1 OS=Mus musculus OX=10090 GN=Sra1 PE=1 SV=3	7	2	2	2	232	25.5	6.43	4.03	115.5	118.8	112	81.7	86.8	85.2	1.365	0.000237	0.448899	24068
Q99L27	Gmpr2	GMP reductase 2 OS=Mus musculus OX=10090 GN=Gmpr2 PE=1 SV=2	14	4	4	3	348	38	7.44	4.1	116.9	119.2	110.2	79.4	90.9	83.4	1.365	0.002027	0.448899	105446
Q0VGB7	Ppp4r2	Serine/threonine-protein phosphatase 4 regulatory subunit 2 OS=Mus musculus OX=10090 GN=Ppp4r2 PE=1 SV=1	9	3	3	3	417	46.5	4.56	2.35	105	123.9	117.4	82.2	95.1	76.5	1.36446	0.016851	0.44833	232314
O70435	Psma3	Proteasome subunit alpha type-3 OS=Mus musculus OX=10090 GN=Psma3 PE=1 SV=3	26	8	16	8	255	28.4	5.44	38.07	116.2	114.7	115.3	86.9	81.1	85.8	1.36407	7.32e-05	0.447913	19167
P23249	Mov10	Putative helicase MOV-10 OS=Mus musculus OX=10090 GN=Mov10 PE=1 SV=2	5	5	5	5	1004	113.5	9.01	8.69	103.5	122.1	120.6	84.2	85.7	83.9	1.36407	0.006789	0.447913	17454
Q6PDY2	Ado	2-aminoethanethiol dioxygenase OS=Mus musculus OX=10090 GN=Ado PE=1 SV=2	8	2	2	2	256	28.4	5.97	1.86	121.6	117	107.6	85.4	78	90.4	1.36407	0.004902	0.447913	211488
Q8CHK3	Mboat7	Lysophospholipid acyltransferase 7 OS=Mus musculus OX=10090 GN=Mboat7 PE=1 SV=1	3	1	1	1	473	53.4	8.69	2.98	120.4	113.1	112.7	89	82.9	81.9	1.36407	0.000773	0.447913	77582
P97425	Ear2	Eosinophil cationic protein 2 OS=Mus musculus OX=10090 GN=Ear2 PE=2 SV=1	26	3	5	2	156	17.6	9.35	3.3	120	118	108	84	84.1	85.9	1.36221	0.001234	0.445944	13587
P45377	Akr1b8	Aldose reductase-related protein 2 OS=Mus musculus OX=10090 GN=Akr1b8 PE=1 SV=2	45	12	20	6	316	36.1	6.37	41.92	118.2	114.3	113.3	83.5	86.6	84.1	1.36035	6.64e-05	0.443974	14187
A0A087WQS2	Bzw1	Basic leucine zipper and W2 domain-containing protein 1 OS=Mus musculus OX=10090 GN=Bzw1 PE=1 SV=1	21	11	17	10	451	51.2	6.95	34.93	114.1	114	117.6	82.7	85	86.5	1.35995	4.68e-05	0.443557	66882
P28798	Grn	Granulins OS=Mus musculus OX=10090 GN=Grn PE=1 SV=2	12	5	5	5	589	63.4	6.8	2.09	111.9	118.9	115	81	79	94.3	1.35981	0.004252	0.443406	14824
Q91WM3	Rrp9	U3 small nucleolar RNA-interacting protein 2 OS=Mus musculus OX=10090 GN=Rrp9 PE=1 SV=1	9	3	3	3	475	52.1	7.88	7.88	109.5	116	120.2	81.4	87.5	85.4	1.35942	0.001057	0.442989	27966
P61290	Psme3	Proteasome activator complex subunit 3 OS=Mus musculus OX=10090 GN=Psme3 PE=1 SV=1	17	4	5	4	254	29.5	5.95	9.69	117.2	116.5	111.9	89.9	82.3	82.1	1.35902	0.000573	0.442572	19192
A0A0G2JFQ4	Nbeal2	Neurobeachin-like protein 2 OS=Mus musculus OX=10090 GN=Nbeal2 PE=1 SV=1	2	3	3	3	2716	298.9	6.47	2.18	114.9	122.3	108.4	85.7	87.1	81.6	1.35849	0.002189	0.442005	235627
O08807	Prdx4	Peroxiredoxin-4 OS=Mus musculus OX=10090 GN=Prdx4 PE=1 SV=1	38	8	20	6	274	31	7.15	34.92	107.8	123.6	114.1	84.9	87.4	82.1	1.3581	0.003296	0.441587	53381
P24527	Lta4h	Leukotriene A-4 hydrolase OS=Mus musculus OX=10090 GN=Lta4h PE=1 SV=4	40	22	45	22	611	69	6.42	81.09	116	115.4	114.1	84.1	84.8	85.6	1.35756	1.78e-06	0.44102	16993
P17439	Gba	Glucosylceramidase OS=Mus musculus OX=10090 GN=Gba PE=1 SV=1	12	6	6	6	515	57.6	7.75	9.55	111.4	117.2	116.9	91.7	79.3	83.5	1.35756	0.001781	0.44102	14466
A2RSQ0	Dennd5b	DENN domain-containing protein 5B OS=Mus musculus OX=10090 GN=Dennd5b PE=1 SV=2	3	4	5	3	1274	144.5	6.68	5.43	110.6	115.7	119.2	84.9	79.6	90	1.35756	0.001481	0.44102	320560
Q62192	Cd180	CD180 antigen OS=Mus musculus OX=10090 GN=Cd180 PE=1 SV=2	4	2	2	2	661	74.3	5.88	4.61	116.7	111.4	117.4	87.4	90.5	76.6	1.35756	0.002782	0.44102	17079
Q9CQC9	Sar1b	GTP-binding protein SAR1b OS=Mus musculus OX=10090 GN=Sar1b PE=1 SV=1	22	5	10	1	198	22.4	6.11	18.1	122.5	109.9	113.1	85.7	80.4	88.4	1.35756	0.002425	0.44102	66397
Q8VCG1	Dut	Deoxyuridine triphosphatase OS=Mus musculus OX=10090 GN=Dut PE=1 SV=1	15	3	3	3	200	21.2	9.58	2.02	113.9	110.6	120.9	92.2	70.6	91.7	1.35717	0.017316	0.440603	110074
P40124	Cap1	Adenylyl cyclase-associated protein 1 OS=Mus musculus OX=10090 GN=Cap1 PE=1 SV=4	37	16	42	15	474	51.5	7.52	75.72	115.9	114.8	114.8	83.9	84.6	86.1	1.35703	2.19e-06	0.440454	12331
O70252	Hmox2	Heme oxygenase 2 OS=Mus musculus OX=10090 GN=Hmox2 PE=1 SV=1	36	10	15	10	315	35.7	5.87	24.79	116.8	113.7	115	85.4	85.7	83.5	1.35703	1.16e-05	0.440454	15369
Q922R8	Pdia6	Protein disulfide-isomerase A6 OS=Mus musculus OX=10090 GN=Pdia6 PE=1 SV=3	42	14	38	14	440	48.1	5.14	70.04	111.6	118	115.8	82.1	90.5	82	1.35664	0.000865	0.440036	71853
D3Z4S3	Ptrhd1	Putative peptidyl-tRNA hydrolase PTRHD1 OS=Mus musculus OX=10090 GN=Ptrhd1 PE=1 SV=1	19	3	4	3	140	16	9.32	7.41	120.1	114	111.3	83.7	84.4	86.6	1.3561	0.000387	0.439469	69709
P97930	Dtymk	Thymidylate kinase OS=Mus musculus OX=10090 GN=Dtymk PE=1 SV=2	13	3	4	3	212	23.9	7.9	2.85	116.6	108.2	120.5	85	78.4	91.3	1.35571	0.004373	0.439052	21915
Q62093	Srsf2	Serine/arginine-rich splicing factor 2 OS=Mus musculus OX=10090 GN=Srsf2 PE=1 SV=4	11	2	6	2	221	25.5	11.85	15.52	117.4	113.4	114.5	89.8	79.2	85.8	1.35518	0.000807	0.438486	20382
P06745	Gpi	Glucose-6-phosphate isomerase OS=Mus musculus OX=10090 GN=Gpi PE=1 SV=4	33	18	43	18	558	62.7	8.13	64.37	117	114.5	113.7	83	88.5	83.3	1.35479	0.000123	0.438067	-
E9Q2M9	Wdfy4	WD repeat and FYVE domain-containing 4 OS=Mus musculus OX=10090 GN=Wdfy4 PE=1 SV=2	4	12	13	12	3183	354.1	6.34	21.29	114.4	117.5	113.2	81.5	92.2	81.2	1.35386	0.001433	0.437083	545030
P13439	Umps	Uridine 5'-monophosphate synthase OS=Mus musculus OX=10090 GN=Umps PE=1 SV=3	12	5	5	5	481	52.3	6.61	12.87	114.7	112.8	117.6	85.7	84.6	84.6	1.35386	3.13e-05	0.437083	22247
P98078	Dab2	Disabled homolog 2 OS=Mus musculus OX=10090 GN=Dab2 PE=1 SV=2	5	3	4	3	766	82.3	6.1	3.75	113	116.8	115.3	85.9	81.5	87.5	1.35386	0.00014	0.437083	13132
Q8CI95	Osbpl11	Oxysterol-binding protein-related protein 11 OS=Mus musculus OX=10090 GN=Osbpl11 PE=1 SV=2	6	4	5	4	751	83.6	7.01	6.77	121.7	118.2	105.1	81.6	88.5	84.8	1.35347	0.005225	0.436665	106326
Q99KK7	Dpp3	Dipeptidyl peptidase 3 OS=Mus musculus OX=10090 GN=Dpp3 PE=1 SV=2	30	18	25	18	738	82.8	5.38	55.82	113.5	115	116.6	83.4	85.9	85.7	1.35333	1.52e-05	0.436517	75221
P01865	Igh-1a	Ig gamma-2A chain C region, membrane-bound form OS=Mus musculus OX=10090 GN=Igh-1a PE=1 SV=3	31	10	61	10	398	43.9	6.29	103.13	116.3	113.8	114.7	81.8	89	84.3	1.35163	0.00018	0.434697	-
P17751	Tpi1	Triosephosphate isomerase OS=Mus musculus OX=10090 GN=Tpi1 PE=1 SV=4	37	10	32	10	299	32.2	5.74	76.55	118.1	114.8	111.8	88	82.3	85	1.35018	0.000264	0.433147	21991
P97492	Rgs14	Regulator of G-protein signaling 14 OS=Mus musculus OX=10090 GN=Rgs14 PE=1 SV=2	9	4	5	4	547	59.8	7.43	8.82	116.1	118.9	109.7	83.2	92.4	79.7	1.35018	0.003081	0.433147	51791
O35841	Api5	Apoptosis inhibitor 5 OS=Mus musculus OX=10090 GN=Api5 PE=1 SV=2	13	7	14	7	504	56.8	5.92	20.3	116.1	113.5	115.1	85.2	84.7	85.5	1.34965	3e-06	0.432583	11800
P27046	Man2a1	Alpha-mannosidase 2 OS=Mus musculus OX=10090 GN=Man2a1 PE=1 SV=2	18	18	24	18	1150	131.5	8.03	38.86	115	117.2	112.3	84.1	86.7	84.7	1.34834	5.24e-05	0.431181	17158
P31938	Map2k1	Dual specificity mitogen-activated protein kinase kinase 1 OS=Mus musculus OX=10090 GN=Map2k1 PE=1 SV=2	17	8	12	4	393	43.4	6.7	14.12	115	114	115.5	87.2	80.4	88	1.34781	0.000268	0.430616	26395
Q9WTL7	Lypla2	Acyl-protein thioesterase 2 OS=Mus musculus OX=10090 GN=Lypla2 PE=1 SV=1	15	3	6	3	231	24.8	7.23	7.86	115.8	116.3	112.3	79.3	80.5	95.8	1.34742	0.005606	0.430197	26394
Q8CG50	Rab43	Ras-related protein Rab-43 OS=Mus musculus OX=10090 GN=Rab43 PE=1 SV=1	17	4	6	3	210	23.2	5.86	7.21	108.9	119	116.5	84.1	84.8	86.9	1.34636	0.000722	0.429069	69834
Q9EPK6	Sil1	Nucleotide exchange factor SIL1 OS=Mus musculus OX=10090 GN=Sil1 PE=1 SV=2	6	2	2	2	465	52.4	5.27	2.31	118.6	122.7	102.9	86.1	67.5	102.2	1.34558	0.065481	0.42823	81500
Q7JJ13	Brd2	Bromodomain-containing protein 2 OS=Mus musculus OX=10090 GN=Brd2 PE=1 SV=1	2	2	2	1	798	88	9.13	2.37	121.8	113	109.4	89.5	85	81.3	1.34558	0.002543	0.42823	14312
Q8CIE6	Copa	Coatomer subunit alpha OS=Mus musculus OX=10090 GN=Copa PE=1 SV=2	26	31	49	31	1224	138.3	7.65	95.61	117.1	113.8	113.2	85.9	84.2	85.7	1.34519	2.44e-05	0.427812	12847
Q99KE1	Me2	NAD-dependent malic enzyme, mitochondrial OS=Mus musculus OX=10090 GN=Me2 PE=1 SV=1	19	9	13	8	589	65.8	7.61	13.5	118.3	114.6	111.3	88.7	79.6	87.6	1.34506	0.001105	0.427667	107029
Q6ZWQ7	Spcs3	Signal peptidase complex subunit 3 OS=Mus musculus OX=10090 GN=Spcs3 PE=1 SV=1	18	3	3	3	180	20.3	8.62	1.69	114.3	120.4	109.5	87.9	87	81	1.34506	0.001536	0.427667	76687
Q9D287	Bcas2	Pre-mRNA-splicing factor SPF27 OS=Mus musculus OX=10090 GN=Bcas2 PE=1 SV=1	26	6	8	6	225	26.1	5.66	15.56	115.1	111.2	117.8	84.6	85.9	85.4	1.34467	0.000113	0.427248	68183
P54818	Galc	Galactocerebrosidase OS=Mus musculus OX=10090 GN=Galc PE=1 SV=2	5	3	4	3	684	77.2	6.74	1.81	112.1	113.8	118.2	88	88.5	79.4	1.34467	0.001061	0.427248	14420
Q8BT60	Cpne3	Copine-3 OS=Mus musculus OX=10090 GN=Cpne3 PE=1 SV=2	25	12	26	10	533	59.5	5.78	53.02	117	111.3	115.7	87.6	80	88.3	1.34428	0.000753	0.426828	70568
Q3U5Q7	Cmpk2	UMP-CMP kinase 2, mitochondrial OS=Mus musculus OX=10090 GN=Cmpk2 PE=1 SV=2	14	6	7	6	447	50	7.27	14.28	115.6	116.7	111.7	86.3	85.9	83.7	1.34428	6.88e-05	0.426828	22169
Q8JZX4	Rbm17	Splicing factor 45 OS=Mus musculus OX=10090 GN=Rbm17 PE=1 SV=1	4	2	2	2	405	45.3	5.82	2.91	114.6	117	112.5	85.2	93.6	77.2	1.34414	0.003928	0.426684	76938
Q3TUQ5	Pnn	Pinin OS=Mus musculus OX=10090 GN=Pnn PE=1 SV=1	5	4	4	4	726	82.5	7.01	8.79	116.3	113.5	114.2	83.8	86.4	85.8	1.34375	1.41e-05	0.426265	18949
Q9DCC5	Cbx3	Cbx3 protein OS=Mus musculus OX=10090 GN=Cbx3 PE=1 SV=1	37	8	14	7	183	20.8	5.33	22.36	119.4	109.4	115	84.6	83.9	87.6	1.34244	0.000712	0.424862	12417
J3QN89	Aamp	Angio-associated migratory protein OS=Mus musculus OX=10090 GN=Aamp PE=1 SV=1	3	1	1	1	436	46.9	4.41	2.26	101.5	123.2	119.1	90.4	83.3	82.4	1.34244	0.014788	0.424862	227290
Q9QXA5	Lsm4	U6 snRNA-associated Sm-like protein LSm4 OS=Mus musculus OX=10090 GN=Lsm4 PE=1 SV=1	10	2	2	2	137	15.1	10.05	2.5	113.1	115	115.8	84	87.6	84.6	1.34231	2.86e-05	0.424719	50783
A2A6T4	Mrpl58	Immature colon carcinoma transcript 1, isoform CRA_c OS=Mus musculus OX=10090 GN=Mrpl58 PE=1 SV=1	3	1	2	1	186	21.3	10.21	2.12	117.6	109.5	116.7	83.9	87.3	85	1.34192	0.000447	0.424299	68572
A0A0R4J187	Xrcc6	X-ray repair cross-complementing protein 6 OS=Mus musculus OX=10090 GN=Xrcc6 PE=1 SV=1	10	7	7	7	608	69.4	6.52	10.96	113.9	113	116.8	91.5	76.7	88.1	1.34101	0.003234	0.423317	14375
G3UVU8	Supt4a	MCG7669, isoform CRA_a OS=Mus musculus OX=10090 GN=Supt4a PE=4 SV=1	10	1	2	1	87	9.5	5.33	3.51	113.6	118.7	111.4	82.7	98.4	75.2	1.34101	0.015301	0.423317	20922
Q9Z1B7	Mapk13	Mitogen-activated protein kinase 13 OS=Mus musculus OX=10090 GN=Mapk13 PE=1 SV=2	6	2	2	2	366	42	8.57	2.01	107.8	117.8	118.1	74.9	82.6	98.8	1.34101	0.020328	0.423317	26415
Q64337	Sqstm1	Sequestosome-1 OS=Mus musculus OX=10090 GN=Sqstm1 PE=1 SV=1	10	3	3	3	442	48.1	5.21	6.13	114	122.3	107.3	78.3	93.7	84.4	1.34009	0.009574	0.422334	18412
F8WJG3	Tra2b	Transformer-2 protein homolog beta OS=Mus musculus OX=10090 GN=Tra2b PE=1 SV=1	30	5	7	5	188	21.9	10.15	12	114.9	117.1	111.6	84	86.7	85.8	1.33957	8.35e-05	0.421771	20462
P23298	Prkch	Protein kinase C eta type OS=Mus musculus OX=10090 GN=Prkch PE=1 SV=2	7	4	4	2	683	77.9	7.68	4.66	120.2	108.3	114.9	75.4	98.6	82.4	1.33931	0.01954	0.421494	18755
Q3UHH8	Gxylt1	Glucoside xylosyltransferase 1 OS=Mus musculus OX=10090 GN=Gxylt1 PE=1 SV=2	7	2	2	2	404	46.5	8.97	4.92	106	113.2	124.1	85.1	70.3	101.2	1.33788	0.049311	0.419949	223827
Q9WVL7	Cxcl15	C-X-C motif chemokine 15 OS=Mus musculus OX=10090 GN=Cxcl15 PE=1 SV=1	14	4	7	4	167	19.1	7.34	9.23	113.1	120.9	109.3	82.6	94.6	79.4	1.33788	0.007354	0.419949	20309
Q8C7V3	Utp15	U3 small nucleolar RNA-associated protein 15 homolog OS=Mus musculus OX=10090 GN=Utp15 PE=1 SV=1	3	2	2	2	528	59.3	8.79	4.19	118.2	107.7	117.4	81.5	85.6	89.6	1.33736	0.002156	0.419387	105372
P18181	Cd48	CD48 antigen OS=Mus musculus OX=10090 GN=Cd48 PE=1 SV=1	17	3	3	3	240	27.4	7.69	5.51	114.8	124.2	104.2	96.4	79.1	81.3	1.33645	0.022154	0.418405	12506
P46737	Brcc3	Lys-63-specific deubiquitinase BRCC36 OS=Mus musculus OX=10090 GN=Brcc3 PE=1 SV=1	10	2	3	2	291	33.3	5.83	1.71	107.5	118.2	117.5	76.6	90.5	89.7	1.33645	0.007122	0.418405	210766
D3YUV1	Nrbp1	Nuclear receptor-binding protein OS=Mus musculus OX=10090 GN=Nrbp1 PE=1 SV=1	5	2	3	2	543	60.8	5.16	2.23	119.2	115.3	108.6	79.6	79.2	98	1.33606	0.014253	0.417984	192292
Q3UXU8	Stn1	CST complex subunit STN1 OS=Mus musculus OX=10090 GN=Stn1 PE=1 SV=1	3	1	1	1	351	40.4	6.8	1.63	129.1	113.1	101	85.8	86.1	85	1.33593	0.024185	0.417842	108689
A2AP78	Hmgb3	High mobility group protein B3 (Fragment) OS=Mus musculus OX=10090 GN=Hmgb3 PE=1 SV=1	30	5	9	4	159	18.3	9.77	16.96	115.2	111	116.9	88	80.9	88	1.33554	0.000619	0.417422	15354
Q5RKN9	Capza1	Capping protein (Actin filament) muscle Z-line, alpha 1 OS=Mus musculus OX=10090 GN=Capza1 PE=1 SV=1	53	10	21	8	286	32.9	5.55	39.84	114.5	112.8	115.7	83.2	85.3	88.5	1.33463	8.23e-05	0.41644	12340
P28271	Aco1	Cytoplasmic aconitate hydratase OS=Mus musculus OX=10090 GN=Aco1 PE=1 SV=3	21	19	27	19	889	98.1	7.5	49.02	114.3	113	115.7	85.4	84.7	86.9	1.33463	9.33e-06	0.41644	11428
A2AMW0	Capzb	Capping protein (Actin filament) muscle Z-line, beta, isoform CRA_a OS=Mus musculus OX=10090 GN=Capzb PE=1 SV=1	47	13	30	13	260	29.3	6.92	46.92	115.4	112.1	115.4	85.4	84.8	86.8	1.33424	2.15e-05	0.416019	12345
Q62384	Zpr1	Zinc finger protein ZPR1 OS=Mus musculus OX=10090 GN=Zpr1 PE=1 SV=1	7	4	4	4	459	50.7	4.78	11.31	117.1	109.5	116.3	87.1	77.9	92.1	1.33372	0.004004	0.415458	22687
Q8R180	Ero1a	ERO1-like protein alpha OS=Mus musculus OX=10090 GN=Ero1a PE=1 SV=2	21	7	10	7	464	54.1	6.54	11.25	114.5	115.6	112.7	78.7	91.5	87	1.33282	0.001757	0.414477	50527
A2AQ43	Fnbp1	Formin-binding protein 1 OS=Mus musculus OX=10090 GN=Fnbp1 PE=1 SV=1	12	8	12	8	554	64.6	5.24	25.56	115.7	114.3	112.7	88.4	83.8	85.1	1.33191	6.16e-05	0.413494	14269
Q9DBG6	Rpn2	Dolichyl-diphosphooligosaccharide--protein glycosyltransferase subunit 2 OS=Mus musculus OX=10090 GN=Rpn2 PE=1 SV=1	26	11	18	11	631	69	5.81	40.06	116.3	113.7	112.7	85.7	83.2	88.4	1.33191	0.000103	0.413494	20014
Q6ZQI3	Mlec	Malectin OS=Mus musculus OX=10090 GN=Mlec PE=1 SV=2	20	6	11	6	291	32.3	6.05	23.37	116.6	112.3	113.8	82.4	89.1	85.8	1.33191	0.000248	0.413494	109154
P22437	Ptgs1	Prostaglandin G/H synthase 1 OS=Mus musculus OX=10090 GN=Ptgs1 PE=1 SV=1	19	10	11	10	602	69	6.83	21.24	117.1	112.7	112.8	87.7	85.5	84.2	1.331	8.9e-05	0.412513	19224
Q60996	Ppp2r5c	Serine/threonine-protein phosphatase 2A 56 kDa regulatory subunit gamma isoform OS=Mus musculus OX=10090 GN=Ppp2r5c PE=1 SV=2	12	7	10	3	524	60.8	6.64	17.75	110.6	120	112	85.8	88	83.6	1.331	0.000882	0.412513	26931
Q5SWN2	Rpa1	Replication protein A subunit OS=Mus musculus OX=10090 GN=Rpa1 PE=1 SV=2	11	7	7	7	644	71.4	8.18	8.97	114.9	110.9	116.8	86.7	85.2	85.5	1.331	9.39e-05	0.412513	68275
G3X8U8	Parg	Poly (ADP-ribose) glycohydrolase, isoform CRA_c OS=Mus musculus OX=10090 GN=Parg PE=1 SV=1	1	2	2	2	961	108.5	6.81	2.21	115.4	109.3	117.9	88.2	82.1	87.1	1.331	0.000858	0.412513	26430
Q9CQ69	Uqcrq	Cytochrome b-c1 complex subunit 8 OS=Mus musculus OX=10090 GN=Uqcrq PE=1 SV=3	30	3	3	3	82	9.8	10.26	7.89	114.6	115.4	112.6	83.2	88.4	85.8	1.331	7.82e-05	0.412513	22272
Q9JIK5	Ddx21	Nucleolar RNA helicase 2 OS=Mus musculus OX=10090 GN=Ddx21 PE=1 SV=3	34	25	30	25	851	93.5	9.11	53.11	115.7	114	112.8	87.5	84.1	85.8	1.33061	2.55e-05	0.412092	56200
Q9WTK5	Nfkb2	Nuclear factor NF-kappa-B p100 subunit OS=Mus musculus OX=10090 GN=Nfkb2 PE=1 SV=1	12	9	9	9	899	96.8	6.37	13.27	112	117.3	113.2	86.3	88	83.2	1.3301	0.000186	0.411531	18034
E9PW03	Gpaa1	Glycosylphosphatidylinositol anchor attachment 1 protein OS=Mus musculus OX=10090 GN=Gpaa1 PE=1 SV=1	2	1	2	1	561	61.4	8.1	5.69	120.1	107.6	114.8	93.8	84.3	79.4	1.3301	0.007033	0.411531	14731
Q6DTY7	Pfkfb4	6-phosphofructo-2-kinase/fructose-2,6-bisphosphatase 4 OS=Mus musculus OX=10090 GN=Pfkfb4 PE=2 SV=4	13	5	6	5	469	54	6.48	6.34	107.5	120.2	114.7	84.7	87	85.9	1.32919	0.001637	0.410551	270198
A2A9P6	Cdk11b	Cyclin-dependent kinase 11B OS=Mus musculus OX=10090 GN=Cdk11b PE=1 SV=1	2	2	3	2	750	87.3	5.31	4.95	117.6	115.2	109.6	81.6	86.1	90	1.32868	0.001139	0.40999	12537
A2AWT7	Ubtf	Nucleolar transcription factor 1 OS=Mus musculus OX=10090 GN=Ubtf PE=1 SV=1	17	11	14	11	752	88.3	9.89	19.74	106	119.9	116.3	86.4	81.6	89.7	1.3279	0.004158	0.409148	21429
Q9CPQ1	Cox6c	Cytochrome c oxidase subunit 6C OS=Mus musculus OX=10090 GN=Cox6c PE=1 SV=3	37	3	4	3	76	8.5	10.14	8.77	117.3	111.6	113.4	84.5	84.4	88.9	1.32777	0.000231	0.409009	12864
S4R2D2	Gga3	ADP-ribosylation factor-binding protein GGA3 OS=Mus musculus OX=10090 GN=Gga3 PE=1 SV=1	4	2	2	2	595	64.5	5.47	2.85	111.1	113.7	117.3	86.3	92.6	79.1	1.32597	0.002844	0.407047	260302
Q9JJA2	Cog8	Conserved oligomeric Golgi complex subunit 8 OS=Mus musculus OX=10090 GN=Cog8 PE=1 SV=3	1	1	1	1	640	71.6	5.19	2.54	113.3	116.3	112.5	76.7	94.7	86.6	1.32597	0.006264	0.407047	97484
Q91YJ2	Snx4	Sorting nexin-4 OS=Mus musculus OX=10090 GN=Snx4 PE=1 SV=1	19	8	13	8	450	51.7	5.8	28.27	113.3	114.3	114.4	85.5	88.5	84	1.32558	3.37e-05	0.406625	69150
A0A0A6YW80	Naa15	N-alpha-acetyltransferase 15, NatA auxiliary subunit OS=Mus musculus OX=10090 GN=Naa15 PE=1 SV=1	13	12	13	12	815	95.2	6.98	17.62	115	114.1	112.9	86.1	85.3	86.6	1.32558	2.56e-06	0.406625	74838
Q8BYH7	Tbc1d17	TBC1 domain family member 17 OS=Mus musculus OX=10090 GN=Tbc1d17 PE=1 SV=2	4	3	3	3	645	72.8	5.25	5.68	114.6	116.6	110.8	78.6	91.4	88	1.32558	0.002605	0.406625	233204
Q91X21	Kiaa2013	Uncharacterized protein KIAA2013 OS=Mus musculus OX=10090 GN=Kiaa2013 PE=1 SV=1	5	3	3	3	634	69.4	7.8	3.6	108.3	121.6	112.1	83.9	86.2	88	1.32507	0.00248	0.406066	-
Q3UMW7	Mapkapk3	MAP kinase-activated protein kinase 3 OS=Mus musculus OX=10090 GN=Mapkapk3 PE=1 SV=2	15	6	10	3	384	43.3	8.09	13.55	108.8	117.4	115.7	89.3	81.6	87.2	1.32468	0.001325	0.405644	102626
E9PZA7	Trrap	Transformation/transcription domain-associated protein OS=Mus musculus OX=10090 GN=Trrap PE=1 SV=1	1	4	4	4	3829	433.8	8.24	1.72	109.6	115.2	117.1	83.4	91.3	83.4	1.32468	0.001285	0.405644	100683
Q8BHG1	Nrdc	Nardilysin OS=Mus musculus OX=10090 GN=Nrdc PE=1 SV=1	11	12	15	12	1161	132.8	4.87	20.29	114.5	111.3	116	84.7	84.9	88.5	1.32429	0.000114	0.405222	-
P43277	Hist1h1d	Histone H1.3 OS=Mus musculus OX=10090 GN=Hist1h1d PE=1 SV=2	47	17	83	1	221	22.1	11.03	162.58	115.9	112.1	113.9	85.6	85.6	87	1.32417	1.98e-05	0.405085	-
Q7TN29	Smap2	Stromal membrane-associated protein 2 OS=Mus musculus OX=10090 GN=Smap2 PE=1 SV=1	4	2	2	2	428	46.5	8.87	6.09	109.4	119.8	112.7	80.9	93.8	83.5	1.32417	0.005031	0.405085	69780
Q9D8T2	Gsdmdc1	Gasdermin-D OS=Mus musculus OX=10090 GN=Gsdmdc1 PE=1 SV=1	14	7	8	7	487	53.2	5.1	15.53	114.2	113.6	114.1	85.5	83.8	88.9	1.32417	5.06e-05	0.405085	-
Q8K124	Plekho2	Pleckstrin homology domain-containing family O member 2 OS=Mus musculus OX=10090 GN=Plekho2 PE=1 SV=1	9	4	4	4	495	53.8	5.5	8.32	107.9	121.9	112	89.5	87.7	81	1.32378	0.004701	0.404663	102595
Q6PD26	Pigs	GPI transamidase component PIG-S OS=Mus musculus OX=10090 GN=Pigs PE=1 SV=3	7	4	4	3	555	61.7	6.93	8.97	114.6	115.7	111.5	89.1	86.6	82.5	1.32378	0.000265	0.404663	276846
Q9CWL8	Ctnnbl1	Beta-catenin-like protein 1 OS=Mus musculus OX=10090 GN=Ctnnbl1 PE=1 SV=1	3	2	2	2	563	64.9	5.07	2.24	113.4	107.5	120.9	92.2	75.1	90.9	1.32378	0.014342	0.404663	66642
Q8CEC0	Nup88	Nuclear pore complex protein Nup88 OS=Mus musculus OX=10090 GN=Nup88 PE=1 SV=1	6	3	3	3	753	84.9	6.27	6.24	113	112.5	116.2	80.1	97	81.1	1.32339	0.007629	0.404242	19069
A0A075B5V6	Ighv1-42	Immunoglobulin heavy variable V1-42 OS=Mus musculus OX=10090 GN=Ighv1-42 PE=1 SV=1	51	4	7	1	98	10.8	8.73	15.03	119	110.8	112	90.7	88.3	79.3	1.32327	0.002961	0.404105	-
Q6P1H6	Ankle2	Ankyrin repeat and LEM domain-containing protein 2 OS=Mus musculus OX=10090 GN=Ankle2 PE=1 SV=2	2	2	2	2	964	106.1	7.37	3.71	118.6	110.8	112.3	90.3	76.2	91.8	1.32288	0.007272	0.403682	71782
P15864	Hist1h1c	Histone H1.2 OS=Mus musculus OX=10090 GN=Hist1h1c PE=1 SV=2	46	16	77	5	212	21.3	11	145.21	117.2	112.8	111.5	83.5	87.9	87.1	1.32108	0.000227	0.401721	-
P47791	Gsr	Glutathione reductase, mitochondrial OS=Mus musculus OX=10090 GN=Gsr PE=1 SV=3	16	7	13	7	500	53.6	7.99	35.99	109.1	111.2	121.2	90.4	82.2	85.9	1.32108	0.003329	0.401721	14782
D9J301	Pdlim5	ENH isoform 1d OS=Mus musculus OX=10090 GN=Pdlim5 PE=1 SV=1	25	10	13	1	574	61.8	7.91	27.79	116.4	103.8	121.3	88.6	93.7	76.2	1.32108	0.019791	0.401721	56376
Q8VC88	Gca	Grancalcin OS=Mus musculus OX=10090 GN=Gca PE=1 SV=1	11	3	3	3	220	24.6	5.07	1.83	120.8	105.6	115.1	88	84	86.5	1.32108	0.0038	0.401721	227960
Q6P5F9	Xpo1	Exportin-1 OS=Mus musculus OX=10090 GN=Xpo1 PE=1 SV=1	12	13	17	13	1071	123	6.07	22.27	113.8	109.3	118.3	88.8	81.7	88	1.3207	0.001294	0.401298	103573
O55135	Eif6	Eukaryotic translation initiation factor 6 OS=Mus musculus OX=10090 GN=Eif6 PE=1 SV=2	10	2	4	2	245	26.5	4.74	9.14	115.3	112.9	113.2	87.7	82.4	88.4	1.3207	0.000172	0.401298	16418
Q9CQK7	Rwdd1	RWD domain-containing protein 1 OS=Mus musculus OX=10090 GN=Rwdd1 PE=1 SV=1	12	4	4	4	243	27.8	4.26	2.66	114.8	114.8	111.8	87.5	86.5	84.5	1.3207	3.2e-05	0.401298	66521
Q8BQX0	Rab37	RAB37, member of RAS oncogene family, isoform CRA_a OS=Mus musculus OX=10090 GN=Rab37 PE=1 SV=1	11	2	4	1	216	24.1	6.7	7.58	87.3	117.8	136.2	75.7	86	96.9	1.3198	0.150301	0.400318	58222
Q9JK81	Myg1	UPF0160 protein MYG1, mitochondrial OS=Mus musculus OX=10090 GN=Myg1 PE=1 SV=1	20	6	11	6	380	42.7	7.02	12.95	111.1	114.2	116	89.3	83.2	86.2	1.31929	0.000265	0.399761	60315
E9PYH2	Acot7	Cytosolic acyl coenzyme A thioester hydrolase OS=Mus musculus OX=10090 GN=Acot7 PE=1 SV=1	26	9	14	9	384	42.8	8.68	19.01	117.6	110.4	113.3	91.8	81.3	85.7	1.31878	0.001738	0.399203	70025
Q9R099	Tbl2	Transducin beta-like protein 2 OS=Mus musculus OX=10090 GN=Tbl2 PE=1 SV=2	17	7	8	7	442	49.6	9.04	14.51	112.9	113.8	114.6	88.6	82.2	88	1.31878	0.000196	0.399203	27368
P61028	Rab8b	Ras-related protein Rab-8B OS=Mus musculus OX=10090 GN=Rab8b PE=1 SV=1	21	5	9	1	207	23.6	9.07	14.19	116.4	111.1	113.7	89.6	78.7	90.5	1.31839	0.002558	0.39878	235442
Q9D1P0	Mrpl13	39S ribosomal protein L13, mitochondrial OS=Mus musculus OX=10090 GN=Mrpl13 PE=1 SV=1	9	2	2	2	178	20.7	9.35	4.74	109.8	111.7	119.6	89	82	87.8	1.31801	0.001762	0.398357	68537
A0A0R4J034	Pdxdc1	MCG129810, isoform CRA_c OS=Mus musculus OX=10090 GN=Pdxdc1 PE=1 SV=1	11	7	8	7	789	87.4	5.67	18.18	110.1	114.8	116.2	86.6	85.5	86.7	1.31801	0.000129	0.398357	94184
Q9Z160	Cog1	Conserved oligomeric Golgi complex subunit 1 OS=Mus musculus OX=10090 GN=Cog1 PE=1 SV=3	6	6	6	6	980	109	7.18	7.36	115.3	116.7	109.1	84.8	90.5	83.6	1.3175	0.000973	0.3978	16834
A2AUM6	Srp14	Signal recognition particle 14 kDa protein OS=Mus musculus OX=10090 GN=Srp14 PE=1 SV=1	24	2	4	2	97	11.2	10.39	6.62	109.6	118.6	112.9	90.5	80.5	87.9	1.3175	0.002345	0.3978	20813
O88342	Wdr1	WD repeat-containing protein 1 OS=Mus musculus OX=10090 GN=Wdr1 PE=1 SV=3	47	24	36	24	606	66.4	6.6	58.12	114.8	111.9	114.3	86.6	83.6	88.7	1.31711	9.32e-05	0.397377	22388
Q6NZC7	Sec23ip	SEC23-interacting protein OS=Mus musculus OX=10090 GN=Sec23ip PE=1 SV=2	16	13	14	13	998	110.7	5.94	28.66	110.3	119.7	110.9	84.5	91.3	83.2	1.31622	0.002282	0.396396	207352
Q9D3U0	Pus10	Putative tRNA pseudouridine synthase Pus10 OS=Mus musculus OX=10090 GN=Pus10 PE=1 SV=1	6	3	3	3	527	59.7	6.49	1.99	112.7	100.7	127.5	84.1	78.4	96.5	1.31622	0.044118	0.396396	74467
Q8CES0	Naa30	N-alpha-acetyltransferase 30 OS=Mus musculus OX=10090 GN=Naa30 PE=1 SV=2	3	1	1	1	364	39.4	5.64	1.88	124.6	110.9	105.4	93.6	82.7	82.7	1.31622	0.015676	0.396396	70646
Q99J77	Nans	Sialic acid synthase OS=Mus musculus OX=10090 GN=Nans PE=1 SV=1	42	12	27	12	359	40	7.06	37.68	113.5	115.3	112.2	86.6	89.7	82.8	1.31609	0.000237	0.396263	94181
P32020	Scp2	Non-specific lipid-transfer protein OS=Mus musculus OX=10090 GN=Scp2 PE=1 SV=3	20	11	24	11	547	59.1	7.44	42.04	115.4	110.9	114.6	87.5	82	89.6	1.31571	0.000508	0.395839	20280
Q9CQ22	Lamtor1	Ragulator complex protein LAMTOR1 OS=Mus musculus OX=10090 GN=Lamtor1 PE=1 SV=1	30	4	4	4	161	17.7	5.15	4.73	112.1	104.6	124.2	109.6	81.5	68	1.31571	0.113878	0.395839	66508
Q64012	Raly	RNA-binding protein Raly OS=Mus musculus OX=10090 GN=Raly PE=1 SV=3	33	10	14	10	312	33.2	8.84	35.34	116.4	109.5	114.9	89.7	82	87.5	1.31482	0.000935	0.39486	19383
Q9ET30	Tm9sf3	Transmembrane 9 superfamily member 3 OS=Mus musculus OX=10090 GN=Tm9sf3 PE=1 SV=1	10	5	7	5	587	67.5	7.21	10.76	111.7	111.5	117.6	86.5	82	90.7	1.31482	0.001065	0.39486	107358
P27661	H2afx	Histone H2AX OS=Mus musculus OX=10090 GN=H2afx PE=1 SV=2	48	7	29	3	143	15.1	10.74	55	113.8	113	113.9	86.3	84.7	88.3	1.31392	1.49e-05	0.39388	-
Q8BXC6	Commd2	COMM domain-containing protein 2 OS=Mus musculus OX=10090 GN=Commd2 PE=1 SV=1	12	3	3	3	199	22.8	6.62	6.67	110.8	113.4	116.4	88.8	80.7	89.8	1.31354	0.001204	0.393456	52245
P24369	Ppib	Peptidyl-prolyl cis-trans isomerase B OS=Mus musculus OX=10090 GN=Ppib PE=1 SV=2	47	12	32	11	216	23.7	9.55	72.55	116.6	112.4	111.7	86.2	86	87.2	1.31342	6.68e-05	0.393324	19035
Q9D8C4	Ifi35	Interferon-induced 35 kDa protein homolog OS=Mus musculus OX=10090 GN=Ifi35 PE=1 SV=3	13	3	4	3	286	31.9	5.87	8.31	114	114.1	112.5	89.1	81	89.3	1.31303	0.000625	0.3929	70110
B1AXP6	Tomm5	Mitochondrial import receptor subunit TOM5 homolog OS=Mus musculus OX=10090 GN=Tomm5 PE=3 SV=1	27	2	2	2	51	6	9.6	2.5	120.2	108.3	112.1	97.5	74.9	87	1.31303	0.021745	0.3929	68512
P19096	Fasn	Fatty acid synthase OS=Mus musculus OX=10090 GN=Fasn PE=1 SV=2	32	70	146	70	2504	272.3	6.58	254.05	113.2	114.4	112.9	85.8	88.1	85.5	1.31265	8.72e-06	0.392477	14104
Q9D2U9	Hist3h2ba	Histone H2B type 3-A OS=Mus musculus OX=10090 GN=Hist3h2ba PE=1 SV=3	52	8	70	3	126	14	10.37	117.73	114.6	113.6	112.4	89.6	83.3	86.6	1.31252	0.00015	0.392344	-
A0A1Y7VMH3	Vrk1	Serine/threonine-protein kinase VRK1 OS=Mus musculus OX=10090 GN=Vrk1 PE=1 SV=1	15	6	9	6	413	46.8	8.69	10.09	115.4	112.7	112.3	87.3	84.6	87.6	1.31175	3.85e-05	0.391496	22367
Q80WB5	Wdyhv1	Protein N-terminal glutamine amidohydrolase OS=Mus musculus OX=10090 GN=Wdyhv1 PE=1 SV=1	7	1	1	1	209	24.3	5.43	2.33	123.1	108.4	108.9	87.4	89.9	82.2	1.31175	0.007164	0.391496	76773
P01801		Ig heavy chain V-III region J606 OS=Mus musculus OX=10090 PE=1 SV=1	25	2	4	1	115	12.8	7.12	9.96	113.3	121.5	105.6	82.2	98.3	79.1	1.31125	0.023095	0.390941	#N/A
Q8R480	Nup85	Nuclear pore complex protein Nup85 OS=Mus musculus OX=10090 GN=Nup85 PE=1 SV=1	11	6	6	6	656	74.7	5.57	9.71	110.4	110.4	119.6	96.7	78.5	84.5	1.31074	0.012068	0.390385	445007
Q5S006	Lrrk2	Leucine-rich repeat serine/threonine-protein kinase 2 OS=Mus musculus OX=10090 GN=Lrrk2 PE=1 SV=2	4	9	10	9	2527	284.5	6.83	6.04	109.5	119.2	111.6	84.4	91.7	83.7	1.30985	0.002342	0.389406	66725
Q6NV83	U2surp	U2 snRNP-associated SURP motif-containing protein OS=Mus musculus OX=10090 GN=U2surp PE=1 SV=3	7	6	6	6	1029	118.2	8.47	12.1	112.8	114.2	113.3	84.6	85.2	90	1.30985	0.000107	0.389406	67958
P61079	Ube2d3	Ubiquitin-conjugating enzyme E2 D3 OS=Mus musculus OX=10090 GN=Ube2d3 PE=1 SV=1	12	2	3	2	147	16.7	7.8	6.41	112	119.3	108.9	81.5	92.6	85.7	1.30947	0.00389	0.388982	66105
P35700	Prdx1	Peroxiredoxin-1 OS=Mus musculus OX=10090 GN=Prdx1 PE=1 SV=1	70	12	49	10	199	22.2	8.12	92.25	114.2	113.5	112.5	86.3	85.7	87.8	1.30947	4.64e-06	0.388982	18477
Q91Z38	Ttc1	Tetratricopeptide repeat protein 1 OS=Mus musculus OX=10090 GN=Ttc1 PE=1 SV=1	9	2	2	2	292	33.2	5.01	2.9	119.7	111	109.5	84.9	82.4	92.5	1.30947	0.003665	0.388982	66827
Q9D7E3	Ovca2	Esterase OVCA2 OS=Mus musculus OX=10090 GN=Ovca2 PE=1 SV=1	5	1	1	1	225	24.2	5.88	2.82	113.4	114.5	112.3	86.3	91.7	81.8	1.30947	0.000794	0.388982	246257
Q8BIG7	Comtd1	Catechol O-methyltransferase domain-containing protein 1 OS=Mus musculus OX=10090 GN=Comtd1 PE=1 SV=1	11	3	3	3	262	28.9	8.32	8.03	106.5	116.9	116.6	84.7	86.1	89.1	1.30819	0.001869	0.387578	69156
B2RWS6	Ep300	Histone acetyltransferase p300 OS=Mus musculus OX=10090 GN=Ep300 PE=1 SV=2	1	4	4	4	2412	263.1	8.54	3.17	105	117.8	117.2	92.7	82.5	84.7	1.30819	0.006797	0.387578	328572
Q4QRL3	Ccdc88b	Coiled-coil domain-containing protein 88B OS=Mus musculus OX=10090 GN=Ccdc88b PE=1 SV=2	5	5	5	5	1481	166.5	5.33	1.99	114.4	105.4	120.2	86.4	91.5	82	1.30819	0.006388	0.387578	78317
P97379	G3bp2	Ras GTPase-activating protein-binding protein 2 OS=Mus musculus OX=10090 GN=G3bp2 PE=1 SV=2	6	3	4	3	482	54.1	5.62	4.54	117.2	106.4	116.4	92	83.4	84.5	1.30819	0.003729	0.387578	23881
Q8CFE4	Scyl2	SCY1-like protein 2 OS=Mus musculus OX=10090 GN=Scyl2 PE=1 SV=1	5	4	4	4	930	103.3	8.02	4.15	116	111.5	112.6	86.6	81.9	91.5	1.30808	0.00098	0.387447	213326
Q9R1P0	Psma4	Proteasome subunit alpha type-4 OS=Mus musculus OX=10090 GN=Psma4 PE=1 SV=1	35	11	19	11	261	29.5	7.72	22.79	114.9	111.4	113.7	84.2	90.3	85.5	1.30769	0.00023	0.387023	26441
Q9D338	Mrpl19	39S ribosomal protein L19, mitochondrial OS=Mus musculus OX=10090 GN=Mrpl19 PE=1 SV=1	6	2	2	2	292	33.6	9.44	2.54	118.1	115	106.9	82.9	92.2	84.9	1.30769	0.003663	0.387023	56284
Q9D8V0	Hm13	Minor histocompatibility antigen H13 OS=Mus musculus OX=10090 GN=Hm13 PE=1 SV=1	14	5	9	5	378	41.7	6.04	15.63	113.8	115	111.1	88.3	80.6	91.1	1.30731	0.001347	0.386599	-
Q99MR6	Srrt	Serrate RNA effector molecule homolog OS=Mus musculus OX=10090 GN=Srrt PE=1 SV=1	16	13	14	13	875	100.4	5.97	23.4	110.1	114.9	114.9	90.6	85.1	84.4	1.3068	0.000463	0.386044	83701
Q8VBT6	Apobr	Apolipoprotein B receptor OS=Mus musculus OX=10090 GN=Apobr PE=1 SV=1	7	5	5	5	942	102.6	4.36	9.47	104.1	121.4	114.4	85	93.7	81.4	1.3068	0.012818	0.386044	171504
P26011	Itgb7	Integrin beta-7 OS=Mus musculus OX=10090 GN=Itgb7 PE=1 SV=2	3	3	4	2	806	87.4	5.55	2.21	112	113.7	114.2	83.3	105.4	71.4	1.3068	0.05613	0.386044	16421
Q9ES74	Nek7	Serine/threonine-protein kinase Nek7 OS=Mus musculus OX=10090 GN=Nek7 PE=1 SV=1	31	8	9	8	302	34.5	8.25	13.22	112.7	112.4	114.7	85.7	87.3	87.1	1.30642	7.17e-06	0.38562	59125
Q3THK3	Gtf2f1	General transcription factor IIF subunit 1 OS=Mus musculus OX=10090 GN=Gtf2f1 PE=1 SV=2	21	8	10	8	508	57.2	7.01	12.94	114	114	111.9	88.1	83.9	88.2	1.3063	7.34e-05	0.38549	98053
Q922V4	Plrg1	Pleiotropic regulator 1 OS=Mus musculus OX=10090 GN=Plrg1 PE=1 SV=1	13	4	5	4	513	56.9	9.17	4.03	111.7	108.7	119.5	91	75.3	93.9	1.3063	0.015905	0.38549	53317
Q8K4I3	Arhgef6	Rho guanine nucleotide exchange factor 6 OS=Mus musculus OX=10090 GN=Arhgef6 PE=1 SV=1	13	8	8	7	771	87	5.87	5.72	110.2	114.4	115.2	88.1	87.9	84.2	1.30592	0.000188	0.385065	73341
G3X9K3	Arfgef1	Brefeldin A-inhibited guanine nucleotide-exchange protein 1 OS=Mus musculus OX=10090 GN=Arfgef1 PE=1 SV=1	9	16	17	7	1846	208.4	5.86	18.21	101.1	101.7	136.9	84.8	89.9	85.5	1.30553	0.090703	0.38464	211673
P26350	Ptma	Prothymosin alpha OS=Mus musculus OX=10090 GN=Ptma PE=1 SV=2	14	2	12	2	111	12.2	3.79	29.38	113.8	113.5	112.4	85.4	85.1	89.8	1.30503	7.4e-05	0.384086	19231
Q99JX7	Nxf1	Nuclear RNA export factor 1 OS=Mus musculus OX=10090 GN=Nxf1 PE=1 SV=3	11	7	7	7	618	70.3	8.73	8.89	117.6	111.3	110.8	87.4	89.7	83.2	1.30503	0.0008	0.384086	53319
Q8JZR0	Acsl5	Long-chain-fatty-acid--CoA ligase 5 OS=Mus musculus OX=10090 GN=Acsl5 PE=1 SV=1	17	11	16	9	683	76.2	7.09	28.61	114.6	103	122	88.7	83.3	88.4	1.30415	0.010406	0.383106	433256
Q9QXG2	Chm	Rab proteins geranylgeranyltransferase component A 1 OS=Mus musculus OX=10090 GN=Chm PE=1 SV=1	5	3	3	3	665	73.9	4.68	5.03	121.9	107.9	109.8	86.5	88.2	85.7	1.30415	0.004033	0.383106	12662
Q8CIS0	Card11	Caspase recruitment domain-containing protein 11 OS=Mus musculus OX=10090 GN=Card11 PE=1 SV=2	1	1	1	1	1159	134	6.37	1.88	113.1	113.2	113.3	85.1	93	82.3	1.30415	0.001183	0.383106	108723
E9Q481	Ppp4r3a	Serine/threonine-protein phosphatase 4 regulatory subunit 3A OS=Mus musculus OX=10090 GN=Ppp4r3a PE=1 SV=1	5	4	4	2	833	95.3	4.94	4.95	111.1	114.5	114	87	84.5	89	1.30365	9.6e-05	0.382553	68734
Q9JMD0	Znf207	BUB3-interacting and GLEBS motif-containing protein ZNF207 OS=Mus musculus OX=10090 GN=Znf207 PE=1 SV=1	4	2	3	2	495	52.8	9.1	8.41	111.4	116.5	111.7	89.5	81	90.1	1.30315	0.001449	0.382	-
Q9Z1Q9	Vars	Valine--tRNA ligase OS=Mus musculus OX=10090 GN=Vars PE=1 SV=1	25	27	48	27	1263	140.1	7.77	83.51	113.2	113.4	112.8	85.4	87.1	88	1.30288	4.67e-06	0.381703	22321
Q80X73	Pelo	Protein pelota homolog OS=Mus musculus OX=10090 GN=Pelo PE=1 SV=3	2	1	1	1	385	43.3	5.99	2.2	110.8	110.3	118.4	99.6	80.3	80.7	1.30276	0.018788	0.381575	105083
P19973	Lsp1	Lymphocyte-specific protein 1 OS=Mus musculus OX=10090 GN=Lsp1 PE=1 SV=2	45	10	18	10	330	36.7	4.82	42.31	113.2	114.4	111.9	83.6	90.1	86.9	1.30276	0.000197	0.381575	16985
Q62018	Ctr9	RNA polymerase-associated protein CTR9 homolog OS=Mus musculus OX=10090 GN=Ctr9 PE=1 SV=2	1	2	2	2	1173	133.3	6.49	4.44	111.3	115.3	112.8	79.2	92.4	89	1.30238	0.00312	0.381149	22083
Q91VC9	Ghitm	Growth hormone-inducible transmembrane protein OS=Mus musculus OX=10090 GN=Ghitm PE=1 SV=1	10	3	3	3	346	37.3	9.8	8.54	113.6	111.7	114	87	92	81.7	1.3015	0.001018	0.380171	66092
Q9R0C0	Bloc1s6	Biogenesis of lysosome-related organelles complex 1 subunit 6 OS=Mus musculus OX=10090 GN=Bloc1s6 PE=1 SV=1	5	1	1	1	172	19.7	6.3	2.47	113.7	117.2	108.4	81.8	84.9	94	1.3015	0.004216	0.380171	18457
Q6ZQL4	Wdr43	WD repeat-containing protein 43 OS=Mus musculus OX=10090 GN=Wdr43 PE=2 SV=2	2	2	3	2	677	75.3	5.38	5.93	111.8	115.4	112.1	87.6	89.1	84	1.3015	0.000161	0.380171	72515
Q9JK23	Psmg1	Proteasome assembly chaperone 1 OS=Mus musculus OX=10090 GN=Psmg1 PE=1 SV=1	2	1	1	1	289	33.1	6.37	1.98	108.1	114.9	116.1	87.8	85.9	87.1	1.30023	0.000515	0.378767	56088
Q9JJI8	Rpl38	60S ribosomal protein L38 OS=Mus musculus OX=10090 GN=Rpl38 PE=1 SV=3	33	2	5	2	70	8.2	10.1	5.11	110.1	113.5	115.4	85.5	85.4	90.1	1.29885	0.000289	0.377236	67671

## Sheet: Down-regulated（FC ＜0.5）
	Gene Name	Description	Coverage [%]	# Peptides	# PSMs	# Unique Peptides	# AAs	MW [kDa]	calc. pI	Score Sequest HT: Sequest HT	Case1	Case2	Case3	Con1	Con2	Con3	FC	P value	Log2FC	NCBI_gene_ID
A0A0A0MQ83	Megf6	Multiple epidermal growth factor-like domains protein 6 OS=Mus musculus OX=10090 GN=Megf6 PE=1 SV=1	4	5	5	5	1572	164.7	6.27	5.28	63.5	64	72.3	138.1	129.4	132.6	0.499375	6.29599e-05	-1.0018	230971
Q91WU0	Ces1f	Carboxylesterase 1F OS=Mus musculus OX=10090 GN=Ces1f PE=1 SV=1	5	2	2	2	561	61.6	6.48	2.6	58.2	68	73	134.4	139.6	126.7	0.49713	0.000304783	-1.0083	234564
Q64374	Rgn	Regucalcin OS=Mus musculus OX=10090 GN=Rgn PE=1 SV=1	17	4	5	4	299	33.4	5.34	13.61	65.1	66.2	67.4	140.4	120.1	140.8	0.495141	0.000599332	-1.01409	19733
Q99LB7	Sardh	Sarcosine dehydrogenase, mitochondrial OS=Mus musculus OX=10090 GN=Sardh PE=1 SV=1	15	11	12	11	919	101.6	6.74	20.81	60.5	70.7	67.4	126.8	143.2	131.5	0.494645	0.000294368	-1.01553	192166
A0A0R4J1R7	Pcbd2	Pterin-4-alpha-carbinolamine dehydratase 2 OS=Mus musculus OX=10090 GN=Pcbd2 PE=1 SV=1	26	3	3	2	103	11.7	6.79	3.35	66	64.5	66.9	137.5	132.3	132.8	0.490313	2.85253e-06	-1.02823	72562
Q9EQZ6	Rapgef4	Rap guanine nucleotide exchange factor 4 OS=Mus musculus OX=10090 GN=Rapgef4 PE=1 SV=1	1	1	1	1	1011	115.4	6.92	2.35	60.9	70.5	64.1	135.6	135.9	133.1	0.483193	1.92424e-05	-1.04933	56508
Q91X83	Mat1a	S-adenosylmethionine synthase isoform type-1 OS=Mus musculus OX=10090 GN=Mat1a PE=1 SV=1	16	5	5	2	396	43.5	5.82	8.36	71.5	64.1	59.2	120.9	128.8	155.6	0.480632	0.0031963	-1.057	11720
P49429	Hpd	4-hydroxyphenylpyruvate dioxygenase OS=Mus musculus OX=10090 GN=Hpd PE=1 SV=3	9	3	3	3	393	45	7.06	4.38	65.1	61.2	68	133.2	145.4	127	0.479043	0.00025555	-1.06177	15445
Q8BSH3	Tpm1	Tropomyosin alpha-1 chain OS=Mus musculus OX=10090 GN=Tpm1 PE=1 SV=1	54	19	37	1	284	32.7	4.74	56.99	61.4	59.7	71.2	115.3	149.7	142.7	0.47167	0.00293405	-1.08415	22003
P16015	Ca3	Carbonic anhydrase 3 OS=Mus musculus OX=10090 GN=Ca3 PE=1 SV=3	48	10	15	10	260	29.3	7.37	33.28	61.8	66.1	64.2	131.8	148.7	127.4	0.470949	0.000404802	-1.08636	-
Q923L6	Ear10	Eosinophil-associated ribonuclease 10 OS=Mus musculus OX=10090 GN=Ear10 PE=3 SV=1	20	2	6	1	156	17.6	8.65	7.54	65.9	65.4	60.4	145.1	141.8	121.3	0.469623	0.00070362	-1.09043	93725
O70250	Pgam2	Phosphoglycerate mutase 2 OS=Mus musculus OX=10090 GN=Pgam2 PE=1 SV=3	18	5	12	3	253	28.8	8.5	22.45	61.2	66.8	63.1	130.6	130.3	147.9	0.467466	0.000276067	-1.09707	56012
Q8BHC0	Lyve1	Lymphatic vessel endothelial hyaluronic acid receptor 1 OS=Mus musculus OX=10090 GN=Lyve1 PE=1 SV=1	5	2	2	2	318	34.6	8.03	3.01	62.6	63	64.2	127.6	142.6	140	0.462701	9.40018e-05	-1.11185	114332
P05977	Myl1	Myosin light chain 1/3, skeletal muscle isoform OS=Mus musculus OX=10090 GN=Myl1 PE=1 SV=2	30	6	7	4	188	20.6	5.03	6.55	59.1	67	63.5	133.4	139.3	137.7	0.461988	1.40328e-05	-1.11407	17901
D3Z3P8	Akr1c6	Estradiol 17 beta-dehydrogenase 5 (Fragment) OS=Mus musculus OX=10090 GN=Akr1c6 PE=1 SV=8	10	2	2	1	174	20.2	8.32	2.46	62.4	64.1	62.5	138.9	138.2	134	0.459742	1.39224e-06	-1.1211	83702
P02104	Hbb-y	Hemoglobin subunit epsilon-Y2 OS=Mus musculus OX=10090 GN=Hbb-y PE=1 SV=2	13	2	3	1	147	16.1	8.18	6.24	60.8	63	63.6	132.8	140.2	139.6	0.454193	7.5755e-06	-1.13862	15135
Q3U1J0	Slc38a5	Sodium-coupled neutral amino acid transporter 5 OS=Mus musculus OX=10090 GN=Slc38a5 PE=1 SV=1	4	2	2	2	479	52.6	7.59	4.76	57.5	66.6	62.9	140.2	141.6	131.3	0.452675	5.50739e-05	-1.14345	209837
Q61704	Itih3	Inter-alpha-trypsin inhibitor heavy chain H3 OS=Mus musculus OX=10090 GN=Itih3 PE=1 SV=3	11	8	12	8	889	99.3	6.05	31.28	62.9	60.9	59.4	130.4	149.3	137.1	0.439539	0.000157811	-1.18594	16426
P17892	Pnliprp2	Pancreatic lipase-related protein 2 OS=Mus musculus OX=10090 GN=Pnliprp2 PE=1 SV=2	14	6	13	4	482	54	6.64	17.88	60	57.7	63.1	147	132.5	139.7	0.431298	5.87515e-05	-1.21324	18947
Q9QXF8	Gnmt	Glycine N-methyltransferase OS=Mus musculus OX=10090 GN=Gnmt PE=1 SV=3	21	4	6	4	293	32.7	7.44	12.64	61.5	60.3	58.5	145.1	125.7	148.9	0.429593	0.000384517	-1.21896	14711
E9Q5L2	Itih4	Inter alpha-trypsin inhibitor, heavy chain 4 OS=Mus musculus OX=10090 GN=Itih4 PE=1 SV=1	17	15	26	15	925	102.8	6.37	53.12	59.7	60.5	58.7	142.2	137.6	141.2	0.424941	6.97019e-07	-1.23467	16427
A0A1W2P7A4	Pcbd1	Pterin-4-alpha-carbinolamine dehydratase OS=Mus musculus OX=10090 GN=Pcbd1 PE=1 SV=1	33	2	3	1	60	6.8	6.09	6.66	56.3	64.4	57.9	132.6	146.8	142.1	0.423725	7.57862e-05	-1.2388	13180
P21550	Eno3	Beta-enolase OS=Mus musculus OX=10090 GN=Eno3 PE=1 SV=3	23	9	11	6	434	47	7.18	18.45	59.9	59.2	59.4	145.8	128.2	147.6	0.423387	0.000196837	-1.23995	13808
O88990	Actn3	Alpha-actinin-3 OS=Mus musculus OX=10090 GN=Actn3 PE=2 SV=1	10	8	13	1	900	103	5.45	27.09	61.8	68.1	47.6	136	138.3	148.2	0.420118	0.000330622	-1.25113	11474
Q9DCP2	Slc38a3	Sodium-coupled neutral amino acid transporter 3 OS=Mus musculus OX=10090 GN=Slc38a3 PE=1 SV=1	2	1	1	1	505	55.6	7.09	2.41	55.6	62.2	57.3	153.5	131.9	139.4	0.412194	0.000232159	-1.2786	76257
A1Y9I9	Tomt	Transmembrane O-methyltransferase homolog OS=Mus musculus OX=10090 GN=Tomt PE=1 SV=1	3	1	2	1	258	28.8	8.73	4.52	56.5	59.1	59.5	136.3	149.3	139.2	0.412194	3.31311e-05	-1.2786	791260
Q9D753	Exosc8	Exosome complex component RRP43 OS=Mus musculus OX=10090 GN=Exosc8 PE=1 SV=1	13	3	3	3	276	29.9	5.2	1.68	56.5	58.7	57.8	147.2	144	135.7	0.405247	1.70735e-05	-1.30313	69639
Q8VCN5	Cth	Cystathionine gamma-lyase OS=Mus musculus OX=10090 GN=Cth PE=1 SV=1	9	3	4	3	398	43.5	7.65	7.4	55.2	56.9	59.2	144.6	146.1	138.1	0.399487	5.96626e-06	-1.32378	107869
G3X9V8	Serpinb3a	MCG129038 OS=Mus musculus OX=10090 GN=Serpinb3a PE=1 SV=1	6	2	2	2	387	44.4	5.5	2.85	55.5	58.2	55.5	134.6	156.8	139.4	0.392758	0.000213617	-1.34829	20248
Q9Z1R9	Prss1	MCG124046 OS=Mus musculus OX=10090 GN=Prss1 PE=1 SV=1	15	3	6	1	246	26.1	4.94	10.74	57.2	54.6	57.2	158.7	130.2	142	0.392202	0.00046485	-1.35033	114228
Q9WV35	Apobec2	C->U-editing enzyme APOBEC-2 OS=Mus musculus OX=10090 GN=Apobec2 PE=1 SV=1	9	3	3	3	224	25.6	4.79	4.6	56.8	57	54.3	150.9	136.7	144.3	0.38921	3.05698e-05	-1.36138	11811
Q8C196	Cps1	Carbamoyl-phosphate synthase [ammonia], mitochondrial OS=Mus musculus OX=10090 GN=Cps1 PE=1 SV=2	11	15	20	14	1500	164.5	6.92	29.77	50.2	56.1	55.8	149.2	140.4	148.4	0.370091	1.11347e-05	-1.43405	227231
P12246	Apcs	Serum amyloid P-component OS=Mus musculus OX=10090 GN=Apcs PE=1 SV=2	22	4	6	4	224	26.2	6.35	19.36	52.8	54.2	54.2	155.6	136.9	146.2	0.367449	6.90548e-05	-1.44438	20219
P07310	Ckm	Creatine kinase M-type OS=Mus musculus OX=10090 GN=Ckm PE=1 SV=1	30	12	19	10	381	43	7.06	28.56	53.1	54.3	53.1	154.2	137	148.2	0.365271	5.14753e-05	-1.45296	12715
Q91WT9	Cbs	Cystathionine beta-synthase OS=Mus musculus OX=10090 GN=Cbs PE=1 SV=3	15	8	8	8	561	61.5	6.48	16.13	51.6	53	55.3	148.4	148	143.7	0.363327	9.2336e-07	-1.46066	12411
Q8JZV9	Bdh2	3-hydroxybutyrate dehydrogenase type 2 OS=Mus musculus OX=10090 GN=Bdh2 PE=1 SV=1	4	1	1	1	245	26.7	7.99	2.38	45.3	54.1	58.8	146.6	145.5	149.8	0.358	2.22125e-05	-1.48197	69772
Q08731	Reg2	Lithostathine-2 OS=Mus musculus OX=10090 GN=Reg2 PE=1 SV=1	16	2	3	2	173	19.4	6.29	5.43	45.7	53.2	58.1	155.7	134.4	152.9	0.354402	0.000231583	-1.49654	19693
P05125	Nppa	Natriuretic peptides A OS=Mus musculus OX=10090 GN=Nppa PE=1 SV=2	5	1	1	1	152	16.6	6.55	1.87	47.1	53.8	52.7	154.4	130.7	161.4	0.344009	0.000509217	-1.53948	230899
P07361	Orm2	Alpha-1-acid glycoprotein 2 OS=Mus musculus OX=10090 GN=Orm2 PE=1 SV=1	8	2	3	1	207	23.8	5.45	8.64	47.3	50.3	51	146.7	160.8	143.9	0.329198	4.65296e-05	-1.60297	18406
Q08189	Tgm3	Protein-glutamine gamma-glutamyltransferase E OS=Mus musculus OX=10090 GN=Tgm3 PE=1 SV=2	4	3	3	3	693	77.3	6.81	2.43	46.5	51.6	49.5	152.5	145.4	154.5	0.32626	5.38843e-06	-1.61591	21818
Q5SX40	Myh1	Myosin-1 OS=Mus musculus OX=10090 GN=Myh1 PE=1 SV=1	32	66	100	11	1942	223.2	5.76	177.89	48	50.1	49.3	153.7	148.1	150.8	0.325674	4.99439e-07	-1.6185	17879
Q60928	Ggt1	Glutathione hydrolase 1 proenzyme OS=Mus musculus OX=10090 GN=Ggt1 PE=1 SV=1	19	9	9	9	568	61.5	7.15	14.61	49.3	48.8	48.8	151.8	147.3	154	0.324211	8.45502e-07	-1.625	14598
Q80W21	Gstm7	Glutathione S-transferase Mu 7 OS=Mus musculus OX=10090 GN=Gstm7 PE=1 SV=1	28	7	14	1	218	25.7	6.8	32.55	48.3	48.9	48.7	153.1	150.7	150.3	0.321295	3.40744e-08	-1.63803	68312
P04247	Mb	Myoglobin OS=Mus musculus OX=10090 GN=Mb PE=1 SV=3	27	6	10	6	154	17.1	7.62	17.82	46.3	47.1	48.9	160.1	141.1	156.5	0.310902	5.73978e-05	-1.68547	17189
Q8K0C5	Zg16	Zymogen granule membrane protein 16 OS=Mus musculus OX=10090 GN=Zg16 PE=1 SV=1	32	4	8	4	167	18.2	9.23	15.67	46	46.2	49.4	164.8	134.2	159.3	0.308968	0.000370422	-1.69447	69036
Q8K009	Aldh1l2	Mitochondrial 10-formyltetrahydrofolate dehydrogenase OS=Mus musculus OX=10090 GN=Aldh1l2 PE=1 SV=2	21	16	19	13	923	101.5	6.29	38.24	46.1	47.4	46.6	161.1	141.8	157	0.304631	5.4535e-05	-1.71486	216188
Q6P6L5	Mybpc1	Myosin-binding protein C, slow-type OS=Mus musculus OX=10090 GN=Mybpc1 PE=1 SV=1	3	3	3	3	1124	126.1	5.95	5.5	38.6	52.5	47.7	157.5	150.5	153.2	0.300954	1.91732e-05	-1.73238	109272
A0A0R4J0B9	Gp2	Glycoprotein 2 (Zymogen granule membrane), isoform CRA_b OS=Mus musculus OX=10090 GN=Gp2 PE=1 SV=1	11	6	9	6	534	59.5	5.3	11.37	44.8	47	46.9	155.4	151.5	154.4	0.300672	1.588e-07	-1.73374	67133
P07744	Krt4	Keratin, type II cytoskeletal 4 OS=Mus musculus OX=10090 GN=Krt4 PE=1 SV=2	25	16	24	11	525	56.2	8.15	38.45	45	46.3	47.3	155.9	154.9	150.5	0.300455	4.56491e-07	-1.73478	16682
Q91X79	Cela1	Chymotrypsin-like elastase family member 1 OS=Mus musculus OX=10090 GN=Cela1 PE=1 SV=1	43	8	18	8	266	28.9	8.24	45.46	44.8	44.4	48.8	154.7	151.2	156.2	0.298637	7.63301e-07	-1.74354	109901
P12710	Fabp1	Fatty acid-binding protein, liver OS=Mus musculus OX=10090 GN=Fabp1 PE=1 SV=2	43	4	5	4	127	14.2	8.56	8.22	41.9	46.5	49.6	143.5	165.1	153.5	0.298637	8.30042e-05	-1.74354	14080
P08730	Krt13	Keratin, type I cytoskeletal 13 OS=Mus musculus OX=10090 GN=Krt13 PE=1 SV=2	30	16	27	9	437	47.7	4.86	44.72	45.7	46.7	44.7	160.6	146.6	155.7	0.296176	1.25747e-05	-1.75547	16663
P05366	Saa1	Serum amyloid A-1 protein OS=Mus musculus OX=10090 GN=Saa1 PE=1 SV=2	7	1	1	1	122	13.8	7.03	2.14	46.6	44.6	45	166.6	149.4	147.7	0.293724	5.60965e-05	-1.76747	20208
A0A0R4J1B0	Tnnt3	Troponin T, fast skeletal muscle OS=Mus musculus OX=10090 GN=Tnnt3 PE=1 SV=1	17	5	7	5	272	32.3	5.31	11.72	39.9	48.4	46.5	155.5	156.3	153.3	0.28983	2.25032e-06	-1.78672	21957
Q792Z0	Prss3	Protease, serine 3 OS=Mus musculus OX=10090 GN=Prss3 PE=1 SV=1	18	3	6	2	246	26.2	5.03	15.75	45	41.6	47.1	164.6	157	144.8	0.286664	4.99372e-05	-1.80257	22073
P16331	Pah	Phenylalanine-4-hydroxylase OS=Mus musculus OX=10090 GN=Pah PE=1 SV=4	4	2	2	2	453	51.9	6.3	5.1	46.5	44.1	43	149.5	154.3	162.7	0.286388	9.97794e-06	-1.80396	18478
P05208	Cela2a	Chymotrypsin-like elastase family member 2A OS=Mus musculus OX=10090 GN=Cela2a PE=1 SV=1	19	3	9	3	271	28.9	8.62	25.23	38.8	53.6	40.6	152.4	185	129.6	0.284797	0.00265293	-1.812	13706
Q61739	Itga6	Integrin alpha-6 OS=Mus musculus OX=10090 GN=Itga6 PE=1 SV=3	8	7	8	2	1091	122.1	7.03	14.36	41.6	45.2	44.9	157.8	160.6	149.9	0.28123	5.05749e-06	-1.83018	16403
Q9CQC2	Clps	Colipase OS=Mus musculus OX=10090 GN=Clps PE=1 SV=1	39	4	11	4	113	12.4	7.8	26.62	39.7	44.1	43.9	152.2	164.4	155.7	0.270379	7.91461e-06	-1.88695	109791
O88986	Gcat	2-amino-3-ketobutyrate coenzyme A ligase, mitochondrial OS=Mus musculus OX=10090 GN=Gcat PE=1 SV=2	13	3	5	3	416	44.9	7.33	12.37	45.5	39.2	40.4	169.1	144.6	161.2	0.263424	9.85493e-05	-1.92454	26912
P09542	Myl3	Myosin light chain 3 OS=Mus musculus OX=10090 GN=Myl3 PE=1 SV=4	35	7	12	6	204	22.4	5.1	21.63	39.8	41.8	42.1	163	151.6	161.6	0.259765	5.62035e-06	-1.94472	17897
Q3TB04	Frmd4a	FERM domain-containing protein 4A OS=Mus musculus OX=10090 GN=Frmd4a PE=1 SV=1	1	1	1	1	737	80.7	9.2	1.73	38.8	43.1	37.7	197.7	247.5	35.2	0.248959	0.133956	-2.00602	209630
Q9ER05	Ctrl	Chymopasin OS=Mus musculus OX=10090 GN=Ctrl PE=1 SV=1	47	7	14	7	264	28.1	8.35	29.82	40	38.9	39.4	171.1	147.2	163.5	0.245538	6.75144e-05	-2.02598	109660
D3Z4W5	1700074P13Rik	RIKEN cDNA 1700074P13 gene (Fragment) OS=Mus musculus OX=10090 GN=1700074P13Rik PE=3 SV=1	4	1	1	1	176	20.1	5.06	2.07	38.3	40.8	39.1	181.6	133.3	166.8	0.245381	0.00106508	-2.0269	73481
Q9JK88	Serpini2	Serpin I2 OS=Mus musculus OX=10090 GN=Serpini2 PE=1 SV=1	21	9	13	9	405	45.7	6.15	24.56	37.9	37.9	39.8	163.7	156.9	163.8	0.238646	8.26386e-07	-2.06706	67931
Q6P8U6	Pnlip	Pancreatic triacylglycerol lipase OS=Mus musculus OX=10090 GN=Pnlip PE=1 SV=1	33	12	27	11	465	51.4	6.83	65.9	36.8	38	39.1	164.5	159.7	161.9	0.234314	1.41564e-07	-2.09349	69060
Q5BKQ4	Pnliprp1	Inactive pancreatic lipase-related protein 1 OS=Mus musculus OX=10090 GN=Pnliprp1 PE=1 SV=2	44	16	31	15	473	52.7	6.34	53.59	36.1	38.1	38.4	159.4	168.8	159.3	0.230974	2.67185e-06	-2.1142	18946
Q9Z0Y2	Pla2g1b	Phospholipase A2 OS=Mus musculus OX=10090 GN=Pla2g1b PE=1 SV=1	5	1	1	1	146	16.3	7.42	3.13	38.2	36.8	37	159.1	168.5	160.4	0.229508	1.89257e-06	-2.12338	18778
Q9D2R4	Tmed11	Transmembrane emp24 domain-containing protein 11 OS=Mus musculus OX=10090 GN=Tmed11 PE=1 SV=1	4	1	2	1	215	24.8	5.57	5.3	28	46.4	37.2	166.6	162.1	159.7	0.228501	2.48189e-05	-2.12973	67366
P00688	Amy2	Pancreatic alpha-amylase OS=Mus musculus OX=10090 GN=Amy2 PE=1 SV=2	50	18	66	12	508	57.3	7.28	139.63	35.3	37.1	38.1	170.8	149.7	169	0.225741	4.94876e-05	-2.14726	-
P13542	Myh8	Myosin-8 OS=Mus musculus OX=10090 GN=Myh8 PE=2 SV=2	31	63	96	19	1937	222.6	5.83	181.67	35.7	36.7	36	170.1	155.7	165.8	0.220504	7.49378e-06	-2.18112	17885
P97457	Mylpf	Myosin regulatory light chain 2, skeletal muscle isoform OS=Mus musculus OX=10090 GN=Mylpf PE=1 SV=3	36	6	8	6	169	18.9	4.92	19.37	35.1	37.3	35.7	174.9	151.8	165.2	0.21976	4.50859e-05	-2.186	17907
Q8C3X8	Lmf2	Lipase maturation factor 2 OS=Mus musculus OX=10090 GN=Lmf2 PE=1 SV=1	2	1	1	1	702	79.9	9.99	2.63	31.8	34.2	41.6	171.3	156	165.1	0.218522	1.77228e-05	-2.19415	105847
Q9QUK9	Try5	MCG15083 OS=Mus musculus OX=10090 GN=Try5 PE=1 SV=1	29	6	22	2	246	26.3	5.3	50.69	34.5	36.4	36.7	172.7	152.5	167.3	0.218477	2.97569e-05	-2.19445	103964
P15947	Klk1	Kallikrein-1 OS=Mus musculus OX=10090 GN=Klk1 PE=1 SV=3	30	7	14	7	261	28.8	5.12	17.65	35.5	36.5	33.2	165.9	160.3	168.6	0.212611	1.00995e-06	-2.23371	16612
Q3USB7	Plcl1	Inactive phospholipase C-like protein 1 OS=Mus musculus OX=10090 GN=Plcl1 PE=1 SV=3	3	3	3	3	1096	122.6	5.64	2.6	30.4	38.9	34.4	172.5	163.4	160.4	0.208946	7.53353e-06	-2.2588	227120
Q61414	Krt15	Keratin, type I cytoskeletal 15 OS=Mus musculus OX=10090 GN=Krt15 PE=1 SV=2	18	10	19	3	452	49.1	4.86	38.57	32.4	34.4	36.3	162.1	175.6	159.2	0.207486	1.43676e-05	-2.26891	16665
Q9CPN9	2210010C04Rik	RIKEN cDNA 2210010C04 gene OS=Mus musculus OX=10090 GN=2210010C04Rik PE=1 SV=1	43	9	23	9	247	26.4	7.93	20.94	32.6	36.8	31.9	171	160.7	167	0.203128	2.49019e-06	-2.29954	67373
B2RS76	Cpb1	Carboxypeptidase B1 (Tissue), isoform CRA_b OS=Mus musculus OX=10090 GN=Cpb1 PE=1 SV=1	52	18	43	18	415	47.5	5.36	80.64	32.3	33.6	33.6	165.2	173	162.4	0.198761	1.96354e-06	-2.33089	76703
O08786	Cckar	Cholecystokinin receptor type A OS=Mus musculus OX=10090 GN=Cckar PE=1 SV=1	6	2	2	2	436	48.4	9.13	4.88	33	32.6	33.5	171.4	155.3	174.2	0.197844	2.22275e-05	-2.33757	12425
P43137	Reg1	Lithostathine-1 OS=Mus musculus OX=10090 GN=Reg1 PE=1 SV=1	48	6	8	6	165	18.5	6.51	19.51	31.2	33.2	32.1	170.7	170.2	162.6	0.191658	9.16346e-07	-2.38339	19692
Q7TPZ8	Cpa1	Carboxypeptidase A1 OS=Mus musculus OX=10090 GN=Cpa1 PE=1 SV=1	43	13	51	13	419	47.4	5.67	96.27	31.7	31.1	31.4	164.5	178	163.3	0.18624	8.30982e-06	-2.42477	109697
Q8VCR2	Hsd17b13	17-beta-hydroxysteroid dehydrogenase 13 OS=Mus musculus OX=10090 GN=Hsd17b13 PE=1 SV=2	17	6	10	4	304	33.4	8.88	20.25	29.6	31.8	31.5	161.1	175.8	170.3	0.183162	5.83048e-06	-2.4488	243168
Q60997	Dmbt1	Deleted in malignant brain tumors 1 protein OS=Mus musculus OX=10090 GN=Dmbt1 PE=1 SV=2	7	8	8	8	2085	226.7	4.97	12.47	21.6	42.4	27.8	170.2	179.4	158.7	0.180602	8.59154e-05	-2.46911	12945
B2RU69	Cuzd1	CUB and zona pellucida-like domain-containing protein 1 OS=Mus musculus OX=10090 GN=Cuzd1 PE=1 SV=1	8	4	5	4	607	68.2	7.03	11.91	31.7	26.6	31.8	183.7	156.8	169.3	0.176736	6.1524e-05	-2.50033	16433
Q64285	Cel	Bile salt-activated lipase OS=Mus musculus OX=10090 GN=Cel PE=1 SV=1	26	16	37	16	599	65.8	6.3	76.69	29.8	30.6	29.6	171.1	173.4	165.4	0.176505	5.1547e-07	-2.50222	12613
Q9D8U3	Erp27	Endoplasmic reticulum resident protein 27 OS=Mus musculus OX=10090 GN=Erp27 PE=1 SV=1	14	3	5	3	272	30.7	5	11.88	28.4	30.5	29	172.6	169.6	169.9	0.171646	2.53543e-08	-2.54249	69187
Q9CR35	Ctrb1	Chymotrypsinogen B OS=Mus musculus OX=10090 GN=Ctrb1 PE=1 SV=1	40	7	34	7	263	27.8	5.07	56.78	29	28.6	30	181.3	157.6	173.5	0.17096	3.4977e-05	-2.54827	66473
O09165	Casq1	Calsequestrin-1 OS=Mus musculus OX=10090 GN=Casq1 PE=1 SV=3	1	1	1	1	405	46.3	4.12	1.91	30.3	26.6	28.9	190.2	159.6	164.4	0.166861	0.00011713	-2.58328	12372
Q504N0	Cpa2	Carboxypeptidase A2 OS=Mus musculus OX=10090 GN=Cpa2 PE=1 SV=1	21	7	16	7	417	47	5.31	30.2	24.7	25.4	32	182.8	162.5	172.5	0.158555	2.10449e-05	-2.65694	232680
Q792Z1	Try10	MCG140784 OS=Mus musculus OX=10090 GN=Try10 PE=1 SV=1	11	3	17	1	246	26.2	5.83	27.73	26.2	28	25.7	181.5	161.2	177.4	0.153624	1.93474e-05	-2.70252	436522
D3Z6P0	Pdia2	Protein disulfide-isomerase A2 OS=Mus musculus OX=10090 GN=Pdia2 PE=1 SV=1	37	20	37	20	527	58.3	4.96	76.01	24.9	25.7	26	175.6	173.8	174.1	0.146323	2.12633e-09	-2.77277	69191
P20801	Tnnc2	Troponin C, skeletal muscle OS=Mus musculus OX=10090 GN=Tnnc2 PE=1 SV=2	12	2	3	1	160	18.1	4.2	6.52	25.3	26.3	23.6	171	179.8	173.9	0.14332	6.37269e-07	-2.80269	21925
A2A6K0	Tnni2	Troponin I, fast skeletal muscle (Fragment) OS=Mus musculus OX=10090 GN=Tnni2 PE=1 SV=1	15	2	3	2	135	15.7	8.57	4.6	23.8	24	25.3	177.8	176.6	172.5	0.138736	8.94872e-08	-2.84959	21953
Q8C6G3	Rnase1	Ribonuclease pancreatic OS=Mus musculus OX=10090 GN=Rnase1 PE=1 SV=1	36	2	4	2	149	16.8	8.29	6.49	17.3	18.8	11.6	142.3	275	135	0.0863661	0.0209725	-3.53339	19752
